# Supplementary material
Source: PubMed Central journal article supplement (PMC3945918)
Supplement: supp_M113.036095_mcp.M113.036095-1.pdf [file supp_M113.036095_mcp.M113.036095-1.pdf]

## **Supplemental Materials**

- I. Meeting Agenda and list of questions
- II. Speakers slide presentations
- III. Discussion group leaders and participants

# Targeted Peptide Measurements in Biology and Medicine: Guidance for Assay Development Using a “Fit-for-Purpose” Approach

June 18 - 19, 2013

NIH Campus  
Bldg. 60  
Bethesda, MD 20892

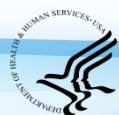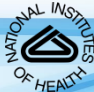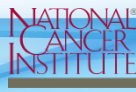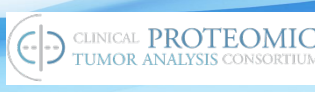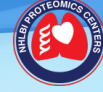

National Heart  
Lung and Blood Institute

## TUESDAY: JUNE 18, 2013

08:00 am – 09:15 am

### Introduction

08:00 am – 08:30 am

#### Registration

08:30 am – 08:45 am

#### Welcome, Overview and Meeting Charge

*Steven A. Carr, Ph.D., The Broad Institute of MIT & Harvard, Boston, MA*

08:45 am – 09:15 am

#### Overview of Fit-for-Purpose Assay Development

*Andrew Hoofnagle, M.D., Ph.D., University of Washington*

09:15 am – 09:45 am

### TIER 1: Clinical Lab/FDA

09:15 am – 09:45 am

#### How Good is Good Enough?

*Russell P. Grant, Ph. D., Laboratory Corporation of America*

09:45 am – 12:45 pm

### TIER 2: Biomarker Verification

09:45 am – 10:15 am

#### Multiplexed Biomarker Verification in Plasma

*Susan Abbatiello, Ph.D., Broad Institute of MIT and Harvard*

10:15 am – 10:45 am

#### Break

10:45 am – 11:15 am

#### Targeted MRM/MS Experiments

*Christoph Borchers, Ph.D., University of Victoria*

11:15 am – 11:45 am

#### LC-MRM MS in Cancer Biology and Translational Research

*John M. Koomen, Ph.D., Moffitt Cancer Center*

11:45 am – 12:15 pm

#### Best Practices for PRISM-SRM Assay Development

*Tao Liu, Ph.D., Pacific Northwest National Laboratory*

12:15 pm – 12:45 pm

#### Targeted Peptide Measurement in Biology and Medicine

*Brad Ackermann, Ph.D., Laboratory for Experimental Medicine, Eli Lilly Company*

12:45 pm – 01:30 pm

#### Lunch (on your own)

01:30 pm – 02:00 pm

#### Protein Target and Biomarker Quantitation in Translational Research of Biologics

*Hendrik Neubert, Ph.D. Pfizer Inc.*

# Targeted Peptide Measurements in Biology and Medicine: Guidance for Assay Development Using a “Fit-for-Purpose” Approach

June 18 - 19, 2013

NIH Campus

Bldg. 60

Bethesda, MD 20892

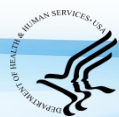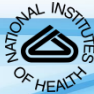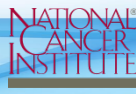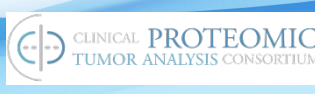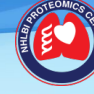

National Heart  
Lung and Blood Institute

01:30 pm – 03:30 pm

## TIER 3: Biology Focus

02:00 pm – 02:30 pm

### Multiplexed Quantitative Analyses conducted in PRM Mode

*Bruno Domon, Ph.D., Luxembourg Clinical Proteomics Center*

02:30 pm – 03:00 pm

### Applying SRM for the quantification of proteins in basic biological/clinical research

*Ruth Huttenhain, Ph.D., UCSF*

03:00 pm – 03:30 pm

### Labeled Reference Peptide Method

*Daniel C. Liebler, Ph.D., Vanderbilt University*

03:30 pm – 05:00 pm

## Data Analysis

03:30 pm – 04:00 pm

### Statistical Design and Analysis of Targeted Quantitative Proteomic Experiments

*Olga Vitek, Ph.D., Purdue University*

04:00 pm – 04:30 pm

### Automated & Reproducible Data Analysis Tools for Targeted Proteomics

*DR Mani, Ph.D., Broad Institute of MIT and Harvard*

04:30 pm – 05:00 pm

### Data Analysis

*Lukas Reiter, Ph.D., BiognoSYS AG*

05:00 pm – 06:00 pm

## Software for Data Acquisition and Databasing

05:00 pm – 05:30 pm

### Software for Data Acquisition and Databasing

*Eric Deutsch, Ph.D., Institute for Systems Biology*

05:30 pm – 06:00 pm

### Targeted Proteomics Environment: Tools for targeted assay development and data analysis

*Brendan MacLean, University of Washington*

06:00 pm

Adjourn

# Targeted Peptide Measurements in Biology and Medicine: Guidance for Assay Development Using a “Fit-for-Purpose” Approach

June 18 - 19, 2013

NIH Campus

Bldg. 60

Bethesda, MD 20892

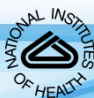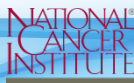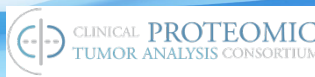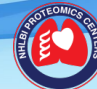

National Heart  
Lung and Blood Institute

WEDNESDAY, JUNE 19, 2013

08:30 am - 12:30 pm

Program Details for Day 2 Session

08:30 am – 10:30 am

Group leaders will convene their break-out groups to review topic areas and begin to formulate best practices and guidance for each defined Tier of targeted measurement/assay development. Groups will also address what information authors must provide in manuscripts.

10:30 am – 11:00 am

Break

11:00 am – 12:30 pm

Reconvene for read-back/presentation/discussion of each group’s proposals and recommendations

12:30 pm

Adjourn

# Targeted Peptide Measurements in Biology and Medicine: Guidance for Assay Development Using a “Fit-for-Purpose” Approach

June 18 - 19, 2013

NIH Campus

Bldg. 60

Bethesda, MD 20892

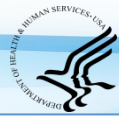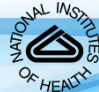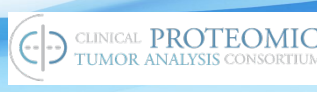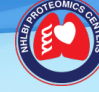

National Heart  
Lung and Blood Institute

## Questions Speakers are to Address

- What are the goals of your targeted MS experiments or software? Who are the “customers” or likely users of the methods and results?
  - o e.g., precisely quantify the concentration(s) of peptide(s) in a tryptic digest of a complex protein matrix (e.g. human serum, human tissue, cell culture lysates), but not the accurate amount of the protein in the original sample. Use in candidate biomarker Verification or to study response to perturbation in a biological system.
  - o e.g., develop software to facilitate and automate collection of targeted MS experimental data by research community
- What range of analyte plex-level per-injection do you typically use in your experiments? What is the impact of the plex-level used on the robustness and figures of merit (CV, LOD, LOQ) of the developed MRM/SRM assays?
- Explain how you establish confidence that what is being measured is the analyte of interest (e.g., match to spectra of an internal standards, match to reference spectra from discovery experiments, RT, etc.). How do these methods differ from “Discovery Proteomics” using data-dependent or data-independent experiments?
- Explain your method of quantification, how many transitions you monitor and which ones are chosen to quantify. If you are using internal standards describe in detail how they are used. If you are not using internal standards, explain how you are quantifying. Discuss the capabilities and limitations of your approach.
- If you generate standard curves (calibration or response curve), explain how you use them to assess the quantitative accuracy of the assay (e.g., are the slope and y-intercept from the curve regression used in calculating the analyte concentration in a sample? Is an external calibration curve used?).
- Can you provide a useful estimate or accurately determine the amount of protein in the matrix based on the measured levels of peptides? Explain how/why. Indicate experimental parameters such as number of peptides per protein and the criteria/computational tools applied. If you have multiple peptides from the same protein and each gives a different answer for the extrapolated protein level, how do you deal with this?
- Describe methods you use to establish presence of interferences and how you deal with them if detected
- How do you account for suppression of ionization in your quantification method?
- How do you “qualify” your measurements/assays, i.e., what criteria do you use or think appropriate to say that your measurements/assays has been successfully developed?
- What software and analytical tools do you use in your studies and why?
- What information do authors need to provide in their manuscripts/supplement to enable reviewers and readers to understand what was done and to be able to judge the confidence of the measurements made?

# **Targeted Peptide Measurements in Biology and Medicine: Best Practices for Assay Development Using a “Fit-for- Purpose” Approach**

**Steven A. Carr, Broad Institute of MIT and Harvard**

**June 18 and 19, 2013 NIH, Bethesda**

# Why have this meeting? Why now?

---

- In the field of Proteomics, umbrella terms like “MRM/SRM” and “targeted MS” can convey the erroneous message that the results are unquestionably correct with respect to what is being detected and how much is present
- New methods (e.g., HR-PRM) are blurring lines between targeted quantification and discovery proteomics: what do we need to watch out for?
- Many targeted-MS papers are being published without documenting what was done and what results were obtained that justify the claims made
  - difficult for reviewers and readers to assess quality and reliability

# Why have this meeting? Why now?

---

## Parallel to situation in discovery proteomics

- MCP developed and published the first set of guidelines for publication of peptide and protein identification data: *Mol Cell Proteomics* (2004) 3: 531
  - try to insure that high quality, significant data are entering the proteomics literature
  - guidelines should not be burdensome nor should they dictate what tools to use: avoid stifling innovation
  - Initiate process requiring submission of data as a condition for acceptance of manuscript
- 2009/2010: Guidelines revised and updated
  - Statistical methods of data analysis
  - quantitative methods used in discovery proteomics



# Top Level Meeting Goals

---

- I. Describe what are people doing and why (“fit for purpose”)  
Strawman: “Tier” approach to measurements
  
- II. Define what information (e.g., experimental methods and results) is needed for reviewers and readers to understand and assess the capabilities and limitations of the study

# Fitness-for-purpose Concept

---

- ◆ “. . .the property of data produced by a measurement process that enables the user of the data to make technically correct decisions for a stated purpose.”
  - ◆ Thompson and Ramsey (1995) Analyst; Bethem and Boyd (1998) J Amer Soc Mass Spectrom; Bethem et al.( 2003) JASMS
- ◆ “. . .the magnitude of the uncertainty associated with a measurement in relation to the needs of the application area.”
  - ◆ Kaiser in Baldwin et al. (1997) JASMS
- ◆ “. . .assay validation should be tailored to meet the intended purpose of the biomarker study, with a level of rigor commensurate with the intended use of the data.”
  - ◆ Lee et al. (2006) Pharm. Research
- ◆ To establish fitness for purpose, ask “Is the uncertainty of the method within the data recipient’s tolerance of uncertainty?”

# Targeted Peptide Measurements in Biology and Medicine

## *What Are the Options*

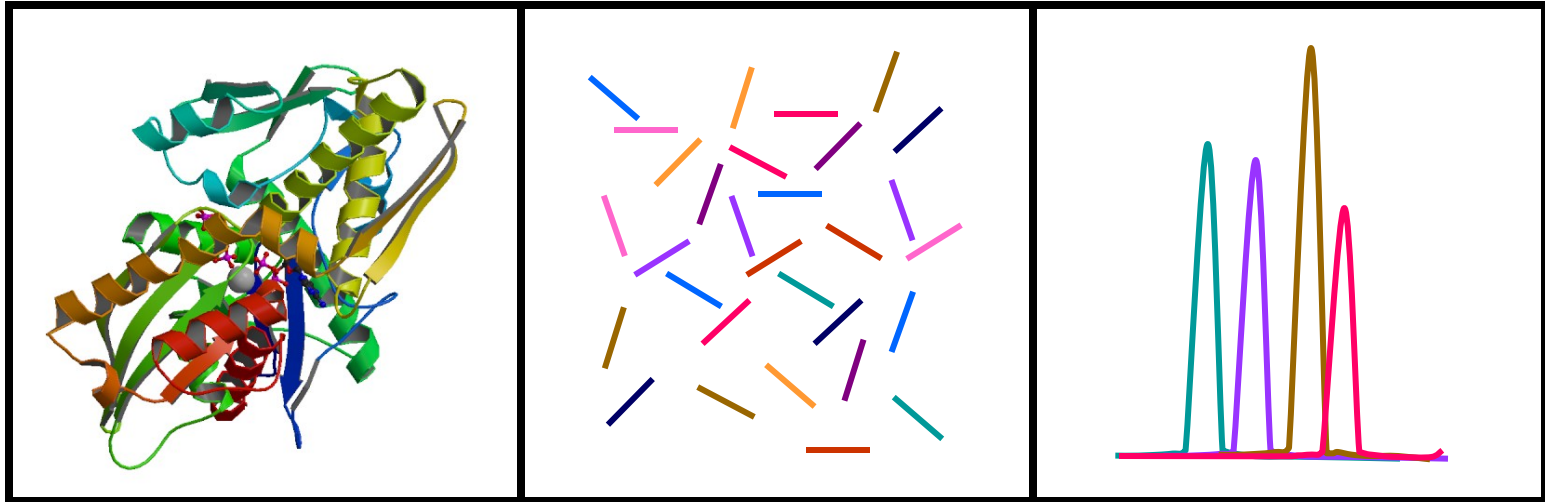

Andy Hoofnagle, MD PhD  
Department of Laboratory Medicine  
University of Washington

# Practical Definitions

## ***Validation:***

A sincere attempt to demonstrate the robustness of a system

## ***Quality control:***

Ensuring that a validated system is working as it should  
(fit-for-purpose)

# Opioid Overdose is a Huge Problem

#1 killer in 2011  
Surpassed car accidents  
5x deaths vs. 1990s

Figure 2: Unintentional drug overdose deaths by major type of drug, United States, 1999-2007

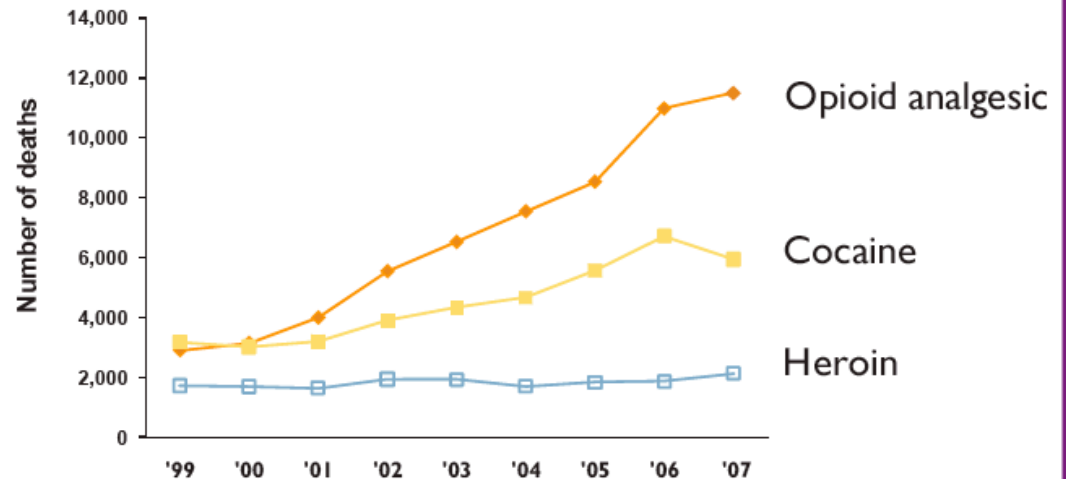

Source: National Vital Statistics System

# Molecular Basis of Cross-Reactivity in Immunoassays

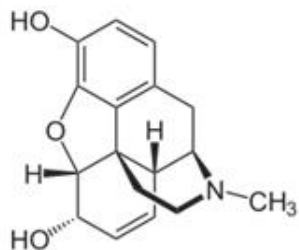

Morphine

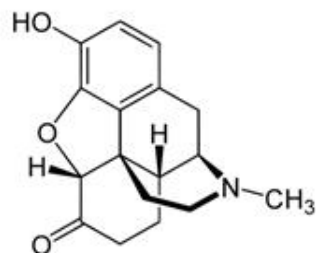

Hydromorphone

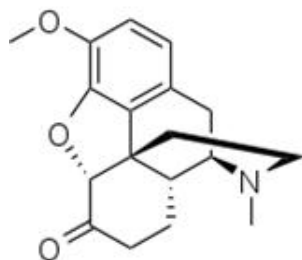

Hydrocodone

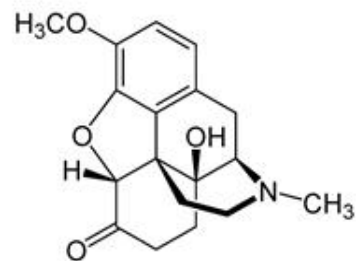

Oxycodone

# Opioid Metabolism

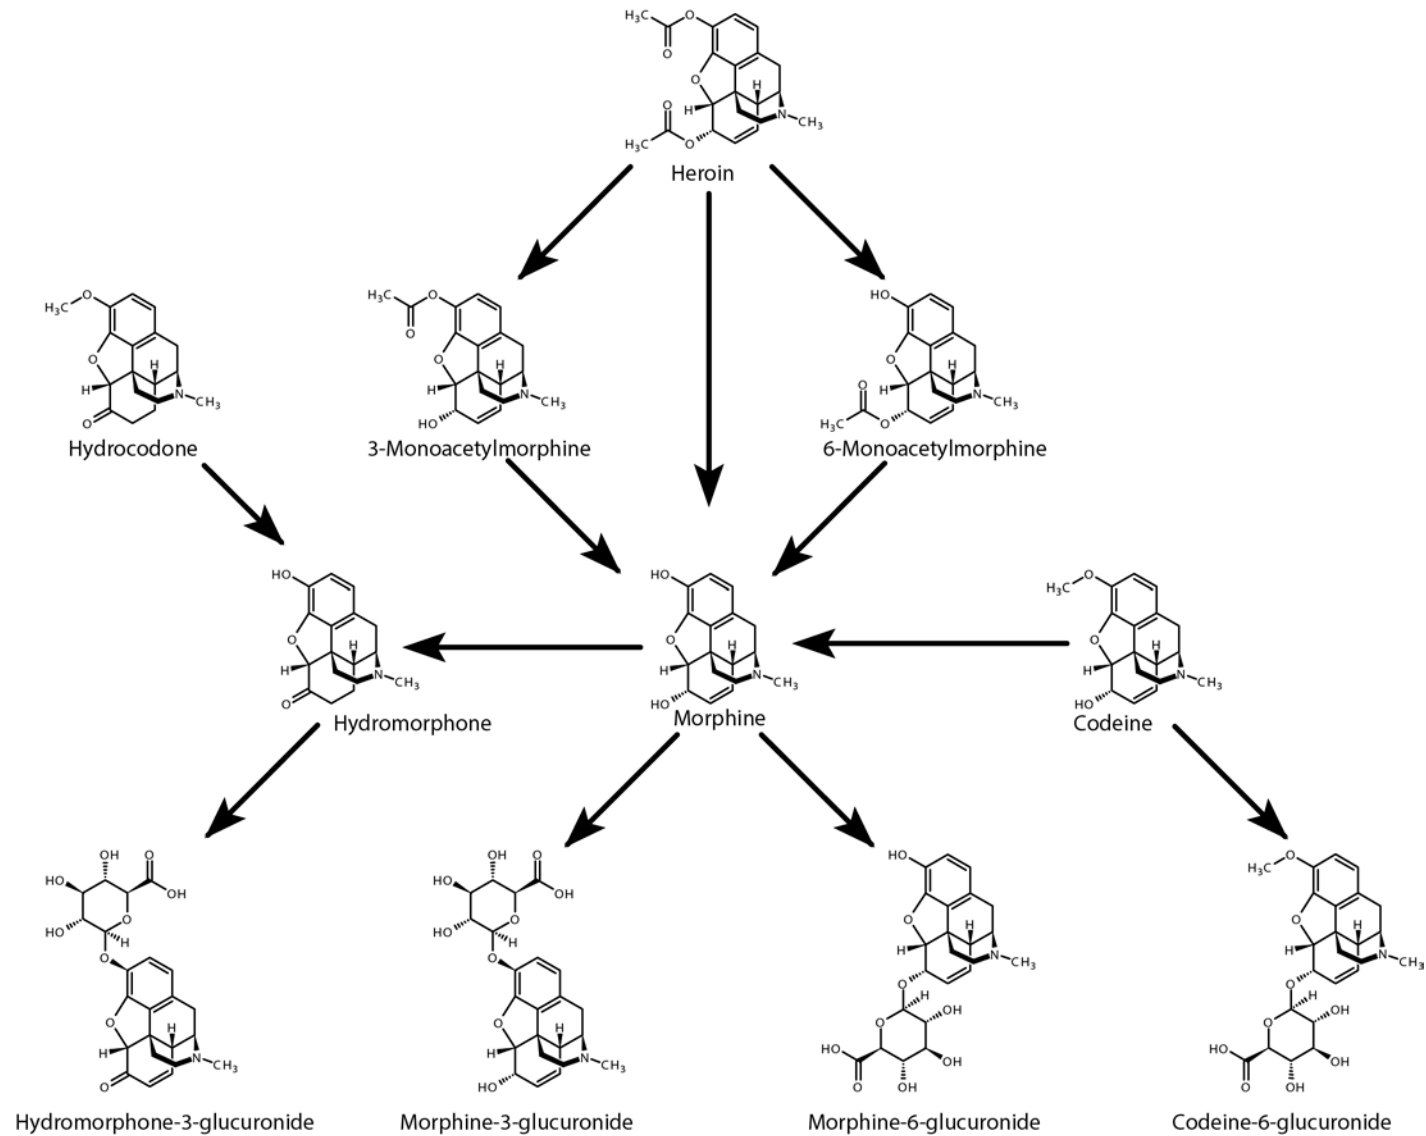

# Chromatogram of 20 Opioids and Metabolites

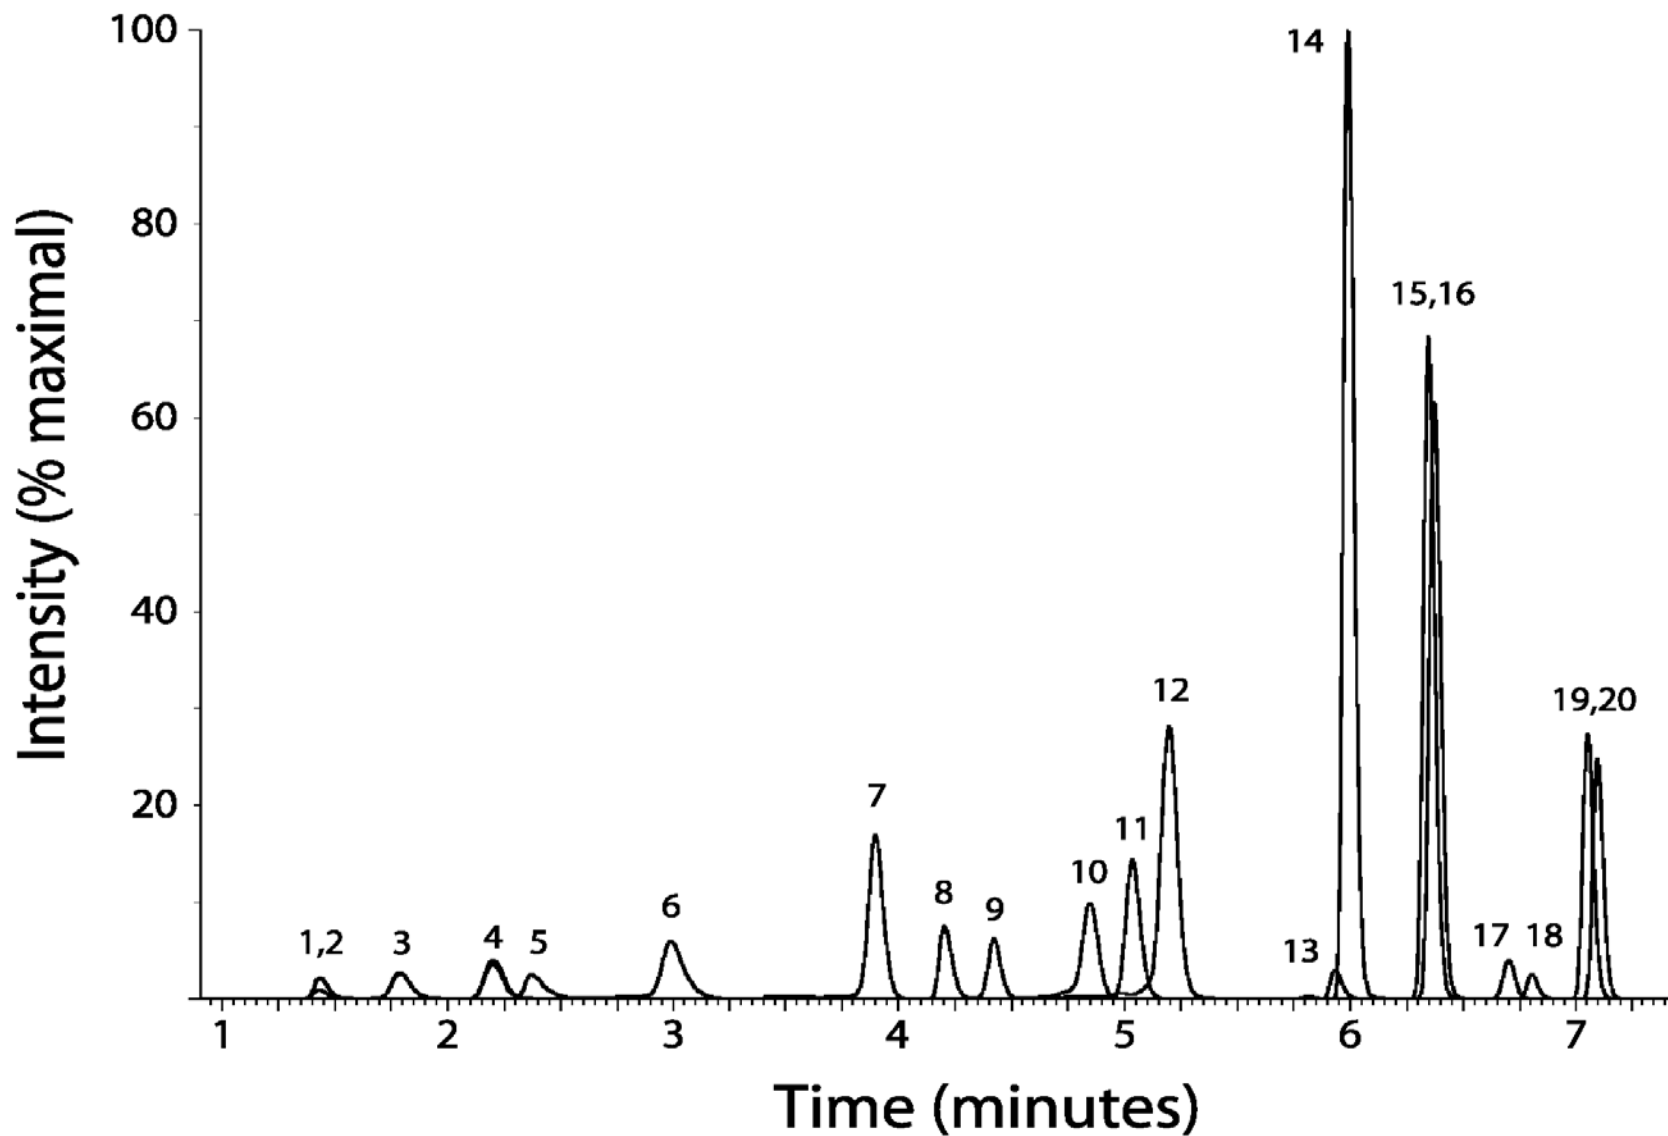



# Quality Control

## *Specificity and Sensitivity*

### **Batch specific**

Lowest calibrator (peak area or signal-to-noise)

System suitability (signal intensity)

Carryover

Internal standard purity

Calibration curve linearity

Quality control materials

### **Specimen specific**

Relative retention time

Confirmatory ion ratios

Minimum internal standard (peak area or signal-to-noise)

# Quality Control

## *Instrument Sensitivity*

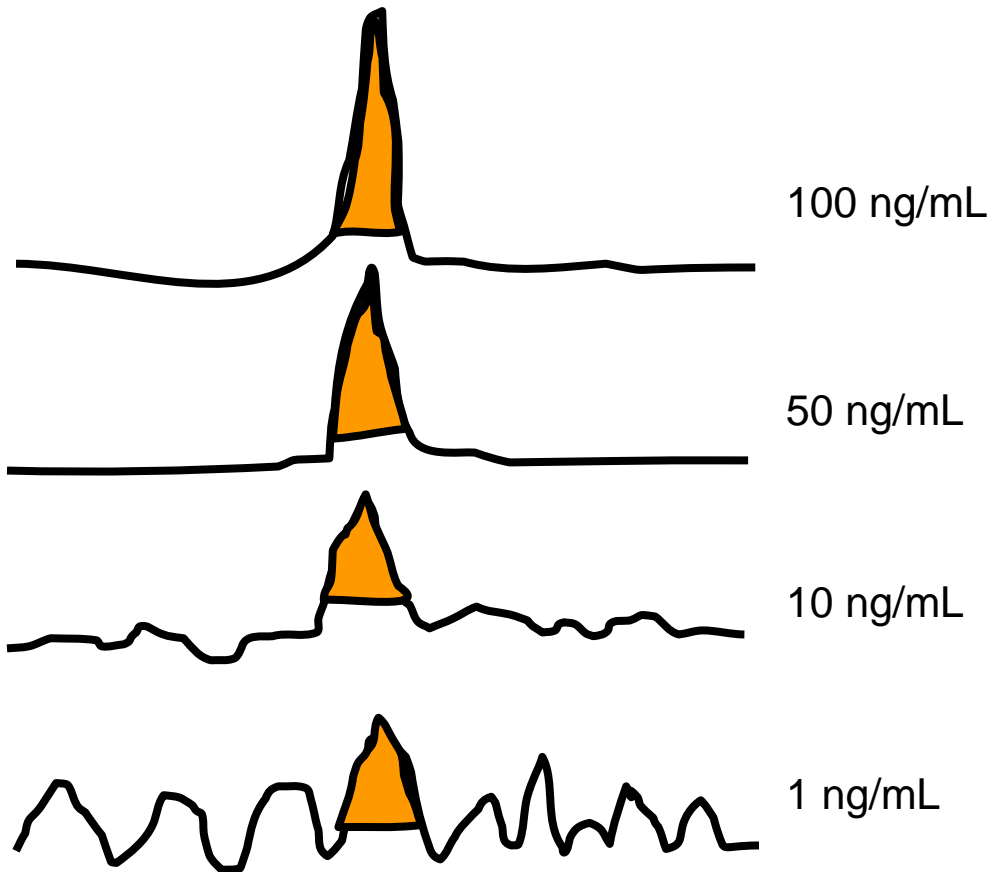

*Solution:*

*Ensure that lowest standard has an acceptable peak area or signal-to-noise.*

Integrating noise?

# Quality Control

## *Instrument Sensitivity*

| Date      | Unextract A<br>D2 | Unextract A<br>D3 | Std A D2 | IS A D2 | Std A D3 | IS A D3 |
|-----------|-------------------|-------------------|----------|---------|----------|---------|
| 1/2/2008  |                   |                   | 300      | 12495   | 435      | 15744   |
| 1/4/2008  | 2015              | 2467              | 258      | 12828   | 374      | 16164   |
| 1/6/2008  |                   |                   | 292      | 13820   | 424      | 17413   |
| 1/8/2008  |                   |                   | 305      | 12584   | 442      | 15856   |
| 1/9/2008  |                   |                   | 284      | 13391   | 412      | 16873   |
| 1/11/2008 | 2410              | 2943              | 307      | 12664   | 445      | 15957   |
| 1/13/2008 |                   |                   | 296      | 13804   | 430      | 17393   |
| 1/15/2008 |                   |                   | 289      | 12706   | 419      | 16010   |
| 1/16/2008 |                   |                   | 245      | 13454   | 355      | 16952   |
| 1/18/2008 | 1913              | 2312              | 234      | 10090   | 339      | 12713   |
| 1/20/2008 |                   |                   | 198      | 9034    | 287      | 11383   |
| 1/22/2008 | 1208              | 1315              | 130      | 7023    | 189      | 8849    |
| 1/23/2008 |                   |                   | 98       | 5012    | 142      | 6315    |

# Quality Control

## *Specificity*

| Sample  | Analyte | Conc | RT   | Analyte Peak Area | IS    | Response | Calc conc | Ion Ratio | Ratio Flag? |
|---------|---------|------|------|-------------------|-------|----------|-----------|-----------|-------------|
| Std D   | D3      | 200  | 2.81 | 12870             | 12370 | 1.04     | 198.9     | 1.5       | NO          |
| Std C   | D3      | 100  | 2.82 | 5990              | 12335 | 0.49     | 100.1     | 1.5       | NO          |
| Std B   | D3      | 30   | 2.88 | 2288              | 13237 | 0.17     | 32.9      | 1.5       | NO          |
| Std A   | D3      | 1    | 2.88 | 252               | 13704 | 0.02     | 0.9       | 1.4       | NO          |
| Ctrl HI | D3      |      | 2.90 | 780               | 13109 | 0.06     | 11.6      | 1.4       | NO          |
| Ctrl LO | D3      |      | 2.86 | 3501              | 13932 | 0.25     | 48.7      | 1.5       | NO          |
| W54634  | D3      |      | 2.83 | 1650              | 13081 | 0.13     | 24.5      | 1.5       | NO          |
| W58132  | D3      |      | 2.86 | 1249              | 12703 | 0.10     | 19.1      | 1.5       | NO          |
| W66023  | D3      |      | 2.89 | 1641              | 13211 | 0.12     | 24.1      | 1.5       | NO          |
| W62743  | D3      |      | 2.81 | 2423              | 12636 | 0.19     | 37.2      | 1.5       | NO          |
| W66817  | D3      |      | 2.86 | 2208              | 13543 | 0.16     | 31.6      | 1.5       | NO          |
| H66438  | D3      |      | 2.83 | 2359              | 12163 | 0.19     | 37.6      | 1.4       | NO          |
| H62633  | D3      |      | 2.81 | 2057              | 13559 | 0.15     | 29.4      | 1.5       | NO          |
| H78948  | D3      |      | 2.82 | 1593              | 12762 | 0.12     | 24.2      | 1.4       | NO          |
| H78388  | D3      |      | 2.82 | 2836              | 12824 | 0.22     | 42.9      | 1.4       | NO          |
| H74054  | D3      |      | 2.87 | 1257              | 12469 | 0.10     | 19.6      | 1.5       | NO          |
| H87727  | D3      |      | 2.67 | 1362              | 12944 | 0.11     | 20.4      | 1.9       | YES         |
| H89927  | D3      |      | 2.85 | 1851              | 12528 | 0.15     | 28.7      | 1.4       | NO          |
| H88721  | D3      |      | 2.89 | 2731              | 13284 | 0.21     | 39.9      | 1.4       | NO          |

# Quality Control

## *Internal Standard*

| Sample  | Analyte | Conc | RT   | Analyte Peak Area | IS    | Response | Calc conc | Ion Ratio | Ratio Flag? |
|---------|---------|------|------|-------------------|-------|----------|-----------|-----------|-------------|
| Std D   | D3      | 200  | 2.84 | 13902             | 12597 | 1.10     | 201.1     | 1.4       | NO          |
| Std C   | D3      | 100  | 2.82 | 5210              | 10349 | 0.50     | 99.8      | 1.3       | NO          |
| Std B   | D3      | 30   | 2.88 | 2128              | 11640 | 0.18     | 33.3      | 1.4       | NO          |
| Std A   | D3      | 1    | 2.87 | 249               | 10274 | 0.02     | 1.1       | 1.4       | NO          |
| Ctrl HI | D3      |      | 2.88 | 808               | 13878 | 0.06     | 10.7      | 1.4       | NO          |
| Ctrl LO | D3      |      | 2.88 | 3190              | 12186 | 0.26     | 48.4      | 1.4       | NO          |
| M64598  | D3      |      | 2.89 | 2809              | 8234  | 0.34     | 63.0      | 1.3       | NO          |
| M67899  | D3      |      | 2.86 | 1408              | 13192 | 0.11     | 19.7      | 1.5       | NO          |
| M70133  | D3      |      | 2.84 | 1504              | 13469 | 0.11     | 20.6      | 1.5       | NO          |
| M70134  | D3      |      | 2.82 | 1443              | 10960 | 0.13     | 24.3      | 1.2       | NO          |
| M70135  | D3      |      | 2.90 | 1703              | 12058 | 0.14     | 26.1      | 1.3       | NO          |
| M71222  | D3      |      | 2.80 | 1774              | 13004 | 0.14     | 25.2      | 1.4       | NO          |
| M72090  | D3      |      | 2.84 | 1932              | 11747 | 0.16     | 30.4      | 1.4       | NO          |
| T80031  | D3      |      | 2.83 | 2034              | 2312  | 0.88     | 162.6     | 1.4       | NO          |
| T80100  | D3      |      | 2.83 | 2178              | 13075 | 0.17     | 30.8      | 1.3       | NO          |
| T81070  | D3      |      | 2.89 | 4508              | 12678 | 0.36     | 65.7      | 1.2       | NO          |
| T90909  | D3      |      | 2.83 | 3488              | 11378 | 0.31     | 56.7      | 1.4       | NO          |
| T91002  | D3      |      | 2.80 | 2912              | 12790 | 0.23     | 42.1      | 1.4       | NO          |
| T91114  | D3      |      | 2.84 | 2600              | 12610 | 0.21     | 38.1      | 1.5       | NO          |

# Quality Control

## *One Step Further*

### **Matrix effects (Ion suppression)**

What do we do if useful internal standards are not available?

Standard addition experiments

Determine that negative results are truly negative

Dickerson, J Anal Toxicol, 2012

Dickerson, Clin Chim Acta, 2013

# Quality Control

*One Step Further*

Every specimen run in quadruplicate

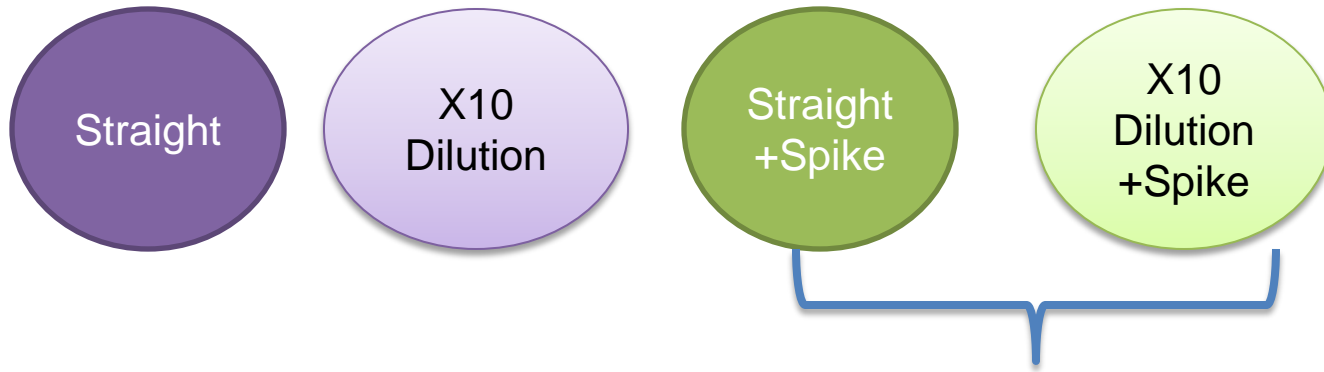

Is Recovery > 80%?

Yes = Negative Sample

No = Interference

# Quality Control

## *Specificity and Interference*

**In the absence of stable isotope labeled analog**

### ***Lack of interference***

Happens during validation

Spike recovery or mixing studies in as many different biological replicates of matrix as possible/reasonable

Constant transition ion ratios across the experiment

Reliable recovery of analyte across the experiment (requires calibration materials)

### ***Specificity***

Rely on (relative) retention time and transition ion ratios in each sample

If there is a question, acquire MS/MS to compare with pure material



# Different Uses of Targeted Assays

Distribution of reagents to clinical laboratories (think FDA)

Patients (laboratory developed tests, think CLIA)

Verification of biomarkers

Discovery of biomarkers

Mechanistic studies in basic science

# Regulatory Statutes and Guidance Documents

Food and Drug Administration

Clinical Laboratory Improvement Amendments of 1988

Clinical Laboratory Standards Institute

International Organization for Standards (ISO)

New York State

Clinical society recommendations

Journal guidelines

# Some Examples of Guidance Documents

## **FDA**

Guidance for Industry, Bioanalytical Method Validation  
2001

## **CLSI (C50)**

Mass Spectrometry in the Clinical Laboratory  
2007

## **ISO (17511)**

Metrological traceability of values assigned to calibrators  
and control materials  
2003

# Examples of Targeted Methods

## ***Target during analysis***

Selected reaction monitoring (SRM, MRM)

Parallel reaction monitoring

Isotope labeled peptides (partial vs. complete coverage of targets)

Winged labeled peptides

Isotope labeled proteins

Purified vs. crude internal standard peptides

## ***Target post hoc***

Data-independent acquisition

# Examples of Targeted Methods

## ***Calibration***

None

Internal standard

External calibration materials

Purified peptides

Recombinant proteins

Native human matrix

*External calibration can improve between-day precision*

# Defining Fit-for-purpose

## **Tier 1**

Clinical laboratory, FDA submission  
Guidelines and regulation

## **Tier 2**

*e.g.* Biomarker verification  
Labeled internal standards for all analytes

## **Tier 3**

*e.g.* Biology focus  
Limited or no use of internal standards

# What is the Measurand?

## **Peptide concentration**

the concentration of a peptide in a tryptic digest of a complex protein matrix (e.g. human serum, human tissue, cell culture lysates), not the amount of a protein in the original sample

## **Protein concentration**

the concentration of protein in a complex protein matrix

# When Does It Become An Assay?

Definition of MRM transitions for a peptide

Detection of a peptide spiked into a matrix

Quantification of a peptide spiked into a matrix

Quantification of protein spiked into a matrix

Quantification of an endogenous protein



# Tiers of Targeted Assays

## *Validation Experiments Performed*

### ***Things we might choose from:***

Recovery, repeatability, reproducibility, linearity, interferences and matrix effects, stability, LLOQ, LOD, carryover

### ***Examples:***

- (1) Bilirubin is spiked into a sample at multiple concentrations. Measured analyte concentration is compared with unspiked sample.
- (2) Two concentrations of peptide are spiked into digested human plasma and injected in triplicate on each of 10 days.

# Tiers of Targeted Assays

## *Validation Criteria Met*

### ***Examples of what we might consider acceptable:***

- (1) The amount of peptide detected before and after the addition of bilirubin to digests of five different human serum samples are within 15% (for each sample and bilirubin concentration tested)
- (2) The average within-day variability for each spike is <10% and the between-day variability for each spike is <15%

# Tier 1 Assay

*The Highest Bar*

|                               |                                                                                          |
|-------------------------------|------------------------------------------------------------------------------------------|
| Oversight:                    | Food & Drug Administration                                                               |
| Guidance documents:           | CLSI (nothing specific for LC-MS yet)                                                    |
| Expected throughput:          | 10,000s                                                                                  |
| Number of labs deploying:     | 100s                                                                                     |
| Clinical validation required: | Yes                                                                                      |
| Assay needed:                 | Calibrated (measuring protein concentration), internal standards, batch quality controls |

# Tier 1 Assay

## *The Highest Bar*

***Simplified example of what might be acceptable to FDA:***

**Precision:** <8% within-day variability, <12% between-day variability

**Bias:** <5% on each of five days

**Calibration curve slope:** <5% difference over five days

**Interference and Matrix effects:** Blank samples (with no spiked internal standard peptide) and double blanks (with no spiked peptide or spiked internal standard peptide) contribute less than 5% of LLOQ signal, recovery of analyte spiked into 60 samples is 85-115% for all samples, three transitions monitored and the two transition ratios are within 25% of mean for all 60 samples and are monitored for all samples in production as QC

# Tier 1 Assay

## *The Highest Bar*

***Simplified example of what might be acceptable to FDA (cont'd):***

**LLOQ validation:** A sample run consecutively for 25 days at a level 50% above the LLOQ has a precision <15%

**Carryover:** Blank samples run after a matrix-matched highest calibrator have less than 5% of the signal at the LLOQ for the endogenous peptide and internal standard channels

**Stability and sample type:** different collection and storage conditions are evaluated for the effect on the measurement of the endogenous analyte concentration, no effect is >15%

**Clinical validation:** safe and effective (PMA, 100s-1000s of samples), equivalence (510k, 100s of samples)

# Tier 1 Assay

## *For Clinical Use*

|                               |                                                                                          |
|-------------------------------|------------------------------------------------------------------------------------------|
| Oversight:                    | CLIA                                                                                     |
| Guidance documents:           | CLSI, accrediting organizations                                                          |
| Expected throughput:          | 1,000s-10,000s                                                                           |
| Number of labs deploying:     | one (or more if published)                                                               |
| Clinical validation required: | Yes                                                                                      |
| Assay needed:                 | Calibrated (measuring protein concentration), internal standards, batch quality controls |

# Tier 1 Assay

*For Clinical Use*

***Consider two different categories:***

## **Category A:**

The same acceptance criteria as for a Level 1 Assay

## **Category B:**

**Precision:** <15% within-day variability (N=20), <20% between-day variability (N=25) at a concentration 50% above the lower end of the analytical measurement range

**Interference and Matrix effects:** recovery of analyte spiked into 10 samples is 80-110% for all samples, three transitions are monitored and the two transition ratios are within 25% of mean for all 10 samples and are monitored for all samples in production as QC

# Tier 1 Assay

## *For Clinical Use*

### **Category B (cont'd):**

**Linearity:** The relationship between expected and observed concentration is linear across the analytical measurement range (for each point, observed concentration is within 10% of expected)

**LLOQ:** Linear dilution of samples with endogenous analyte are each run 5 times and the concentration at which the CV rises to 20% is identified by interpolation

**Carryover:** A blank run after the highest calibrator contributes to less than 5% of the LLOQ

**Stability and sample type:** Different collection and storage conditions are evaluated for the effect on the measurement of the endogenous analyte concentration, no effect is  $>15\%$



# Tier 2 Assay

## *Biomarker Verification*

|                               |                     |
|-------------------------------|---------------------|
| Oversight:                    | Journals, investors |
| Expected throughput:          | 100s                |
| Number of labs deploying:     | 2-4                 |
| Clinical validation required: | No                  |
| Assay needed:                 | Internal standards  |

# Different Tier 2 Assays

## ***Consider the following experiment:***

Seven logarithmic concentrations of peptide are spiked into a matrix (e.g. digested ovarian stromal tissue) and run in duplicate. Constant amount of internal standard peptide is added to each of the samples.

**Category A:** >95% *pure* internal standards, between-day imprecision <20% ( $N=10$ ), two transition ratios are monitored and should be within 25% of the mean over time

**Category B:** same as category A, *unpurified* internal standards

**Category C:** purified or unpurified internal standard peptides, between-day imprecision <20% ( $N=5$ )

# Tier 3 Assay

## *Biology Focus*

|                               |                           |
|-------------------------------|---------------------------|
| Oversight:                    | Journals, grant reviewers |
| Expected throughput:          | 10s                       |
| Number of labs deploying:     | 1                         |
| Clinical validation required: | No                        |
| Assay needed:                 | To be discussed           |

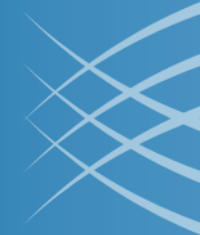

# Tier 2: Multiplexed Biomarker Verification in Plasma

Susan Abbatiello, Ph.D.

The Broad Institute of MIT and Harvard

June 18, 2013

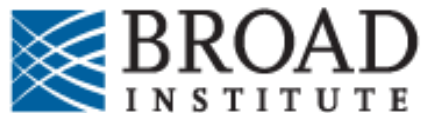

# CPTAC VWG Study 9 – Targeting 34 Proteins in Depleted Plasma, 125 Peptide Targets

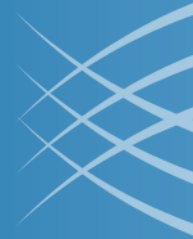

unlabeled protein + <sup>15</sup>N labeled protein

34 proteins  
8-point Curve low amol – 100 fmol/ug

27 proteins  
Fixed Spike Level

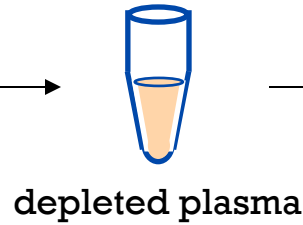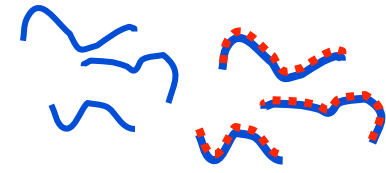

<sup>13</sup>C/<sup>15</sup>N labeled peptides

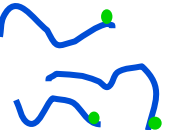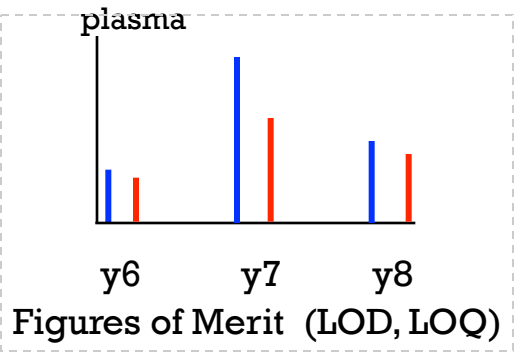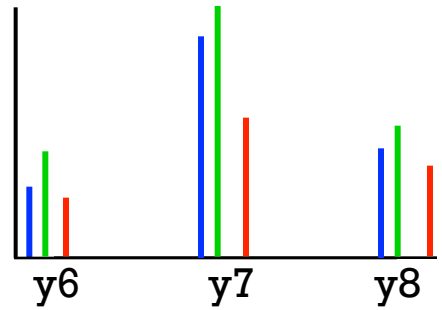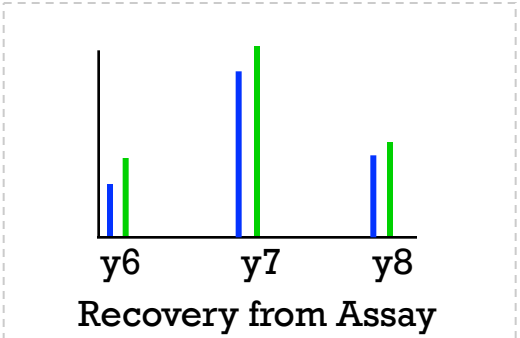

9.1 = 750 transitions  
9.2 = 1095 transitions

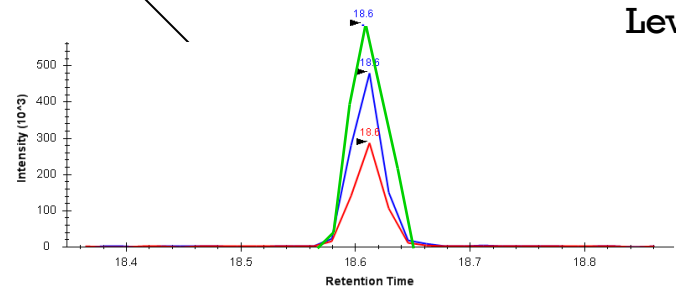

LC-MRM-MS

# CPTAC VWG Study 9 – Targeting 34 Proteins in Depleted Plasma, 125 Peptide Targets

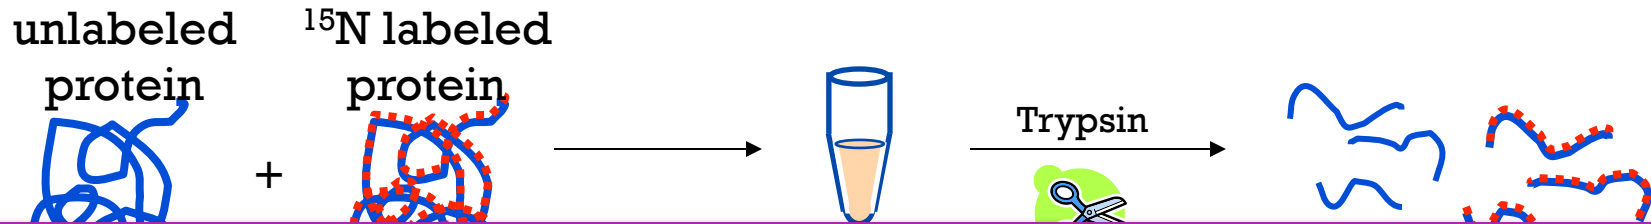

## Goals:

- **Design an assay with low technical variation that can be used to assess biological variation in a large number of samples by precise, relative quantitation**
- Prove feasibility of > 100-plex (34 proteins) assays in plasma
- Improve LOD and LOQ by depleting abundant proteins
- Evaluate true quantitative accuracy and digestion recovery using heavy labeled proteins
- Conduct blinded verification study to assess accuracy, precision and reproducibility across multiple sites and instrument platforms
- Evaluate system suitability test in context of this large-scale inter-lab study

34 proteins, 10 participating sites, 15 instruments, 4 Vendors

# Multiplexed MRM Assays Require Good Quality Data

## Chromatography

- Scheduling puts rigorous demands on RT reproducibility
- Peak width and RT drift are often limiting factors
- Environmental Factors and LC plumbing play key roles

## MS Signal

- What is the minimum MS signal required to satisfy LLOQ criteria?
- How does peak shape influence observed MS signal?
- How important is ESI stability?

**Prior to analyzing complex samples, are LC-MRM-MS systems running in optimal condition?**

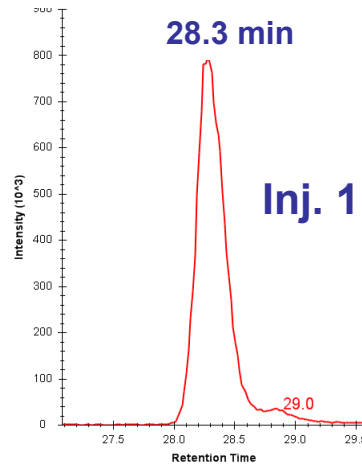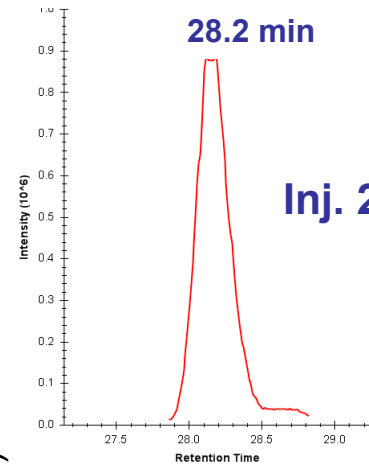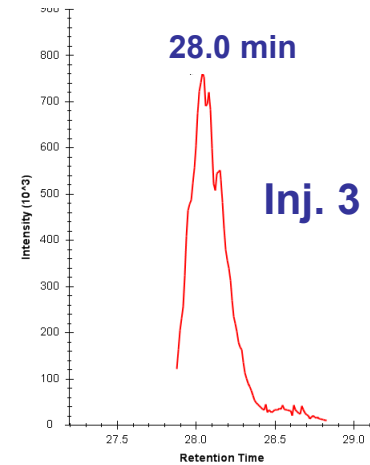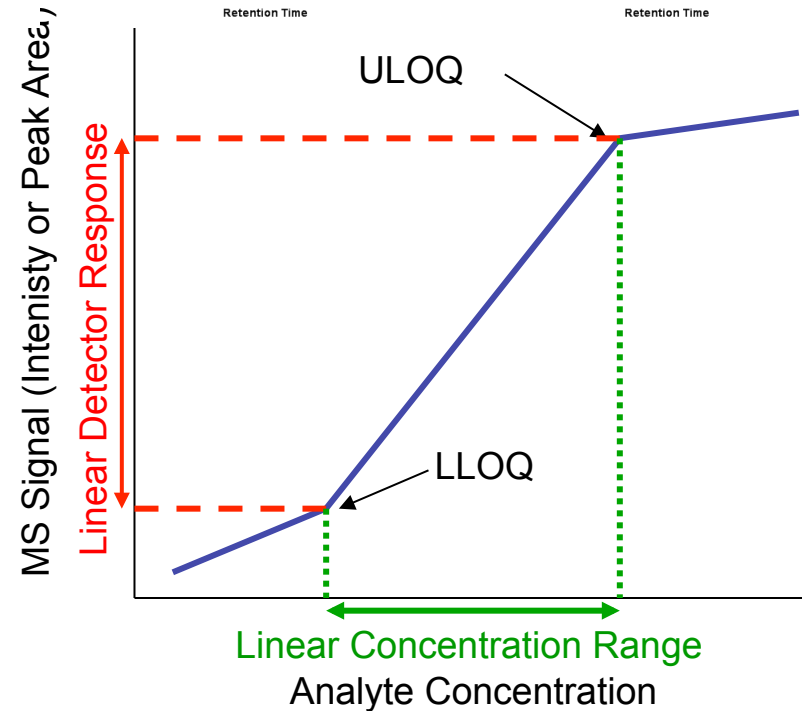

# Analytes

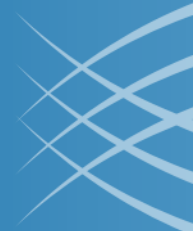

- Typical multiplex levels range from 10s to 160 peptide targets
- Study 9 pushed the upper end of analyte multiplexing
  - 125 peptide targets
  - 1-2 types of isotopically labeled internal standards
  - 750 or 1095 transitions monitored in a single injection (1 hour gradient, 80 min LC cycle time)

## Points to Consider:

- Minimum dwell time
  - 10 msec (\*13-15 msec total)
- Minimum cycle time
  - 1-2 sec (FWHM dependent)
- Retention time scheduling
  - 1.5-2 min
- Number of coeluting transitions
  - 60-120 transitions
    - ~7 - 20 analytes



# <sup>15</sup>N Labeled Proteins Improve Quantitative Accuracy\*



## <sup>13</sup>C/<sup>15</sup>N Peptide Internal Standards

$$\text{Peptide Conc}_{(13\text{C}/15\text{N})} = \frac{\text{Light Peak Area}}{13\text{C}/15\text{N Peak Area}} \times \frac{10 \text{ fmol}}{\mu\text{L}}$$

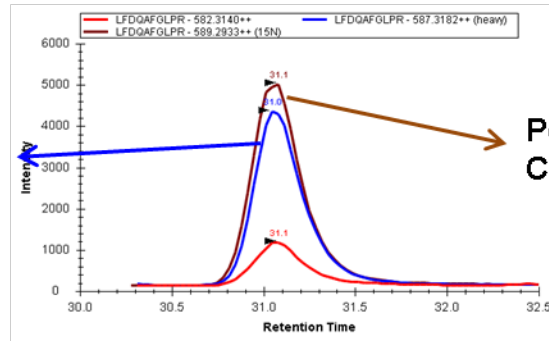

## <sup>15</sup>N Protein Internal Standards

$$\text{Peptide Conc}_{(15\text{N})} = \frac{\text{Light Peak Area}}{15\text{N Peak Area}} \times \frac{25 \text{ fmol}}{\mu\text{L}}$$

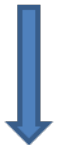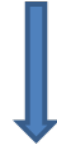

**A**

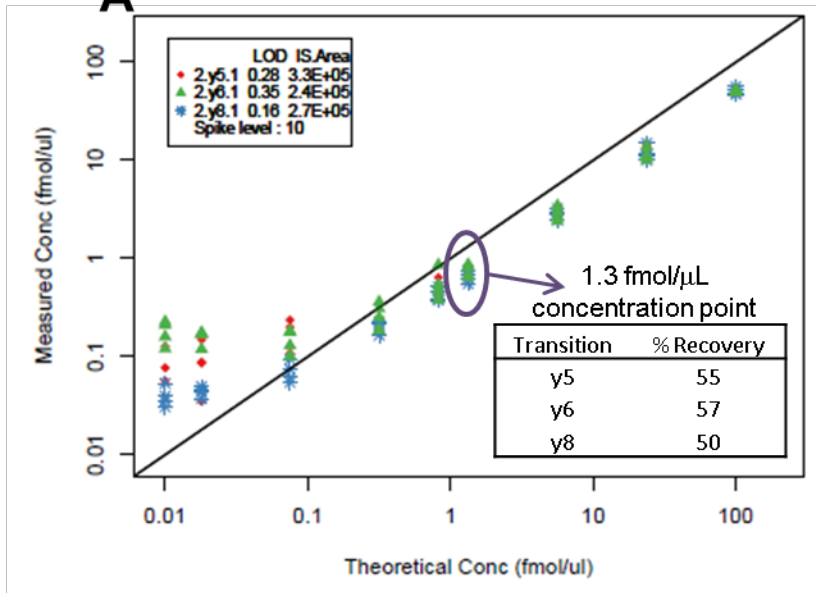

**B**

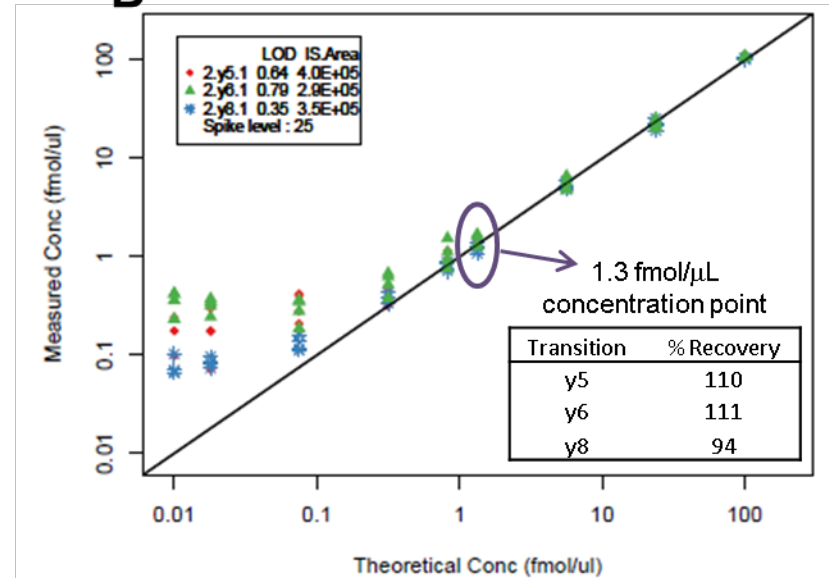

# Limitations to $^{15}\text{N}$ Proteins and Isotopically Labeled Standards in General

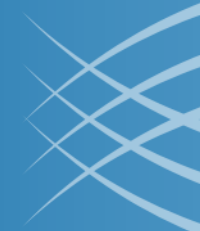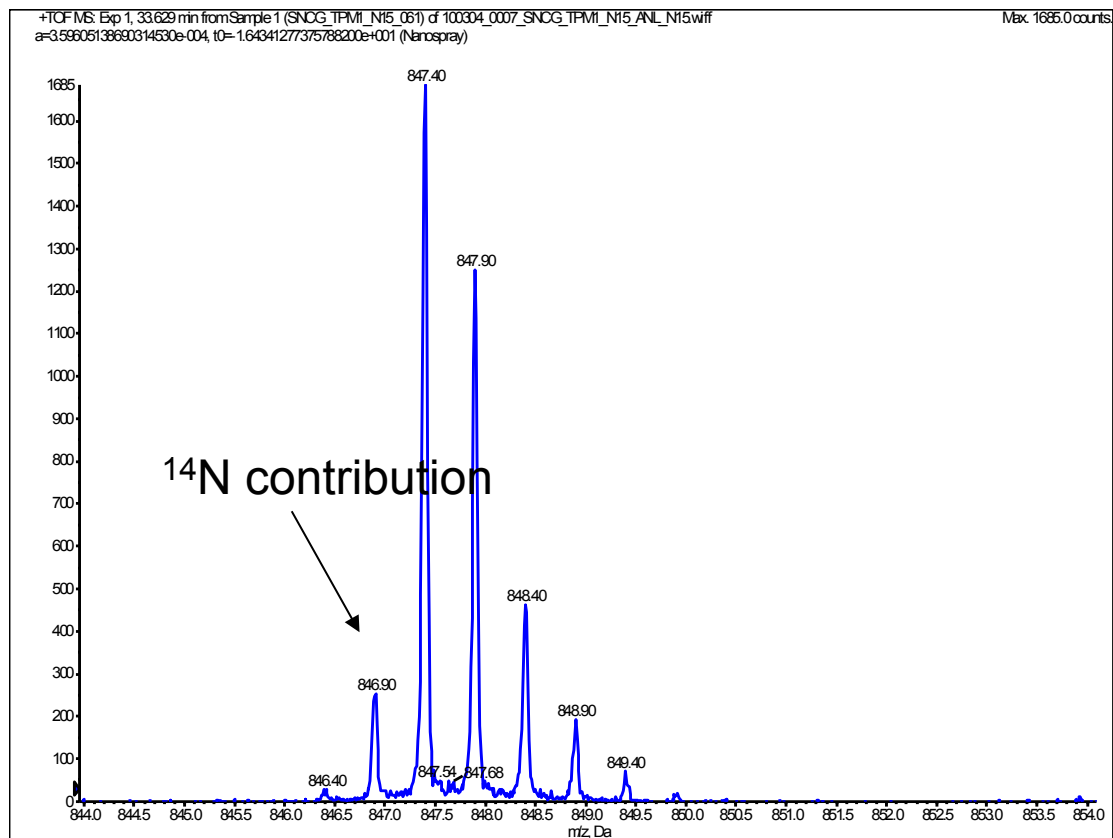

- **Determined  $^{15}\text{N}$  incorporation is 99.10 % for synuclein gamma peptide**  
**TVEEAENIAVTSGVVR**
- **What is the peptide-level  $^{15}\text{N}$  incorporation?**
- **Do protein standards digest the same way as native proteins?**
- **How pure are the proteins?**

- **How confidently do we quantify our standards?**

# LOD/LOQ Calculations: How Many Points in the Curve are Needed?



What is the ideal concentration range?

$$\text{LOD} = \bar{s}_{\text{blank}} + t_{0.95} \times (s_{\text{blank}} + s_{\text{low}}) / \sqrt{n}$$

(fmol/ $\mu\text{L}$ )

250

113

51

23

10

4.6

Proposed:

**LOQ  
range**

**LOD  
range**

2.0

0.9

0.42

0.19

0.09

0.04

0.017

0.008

0.004

0.002

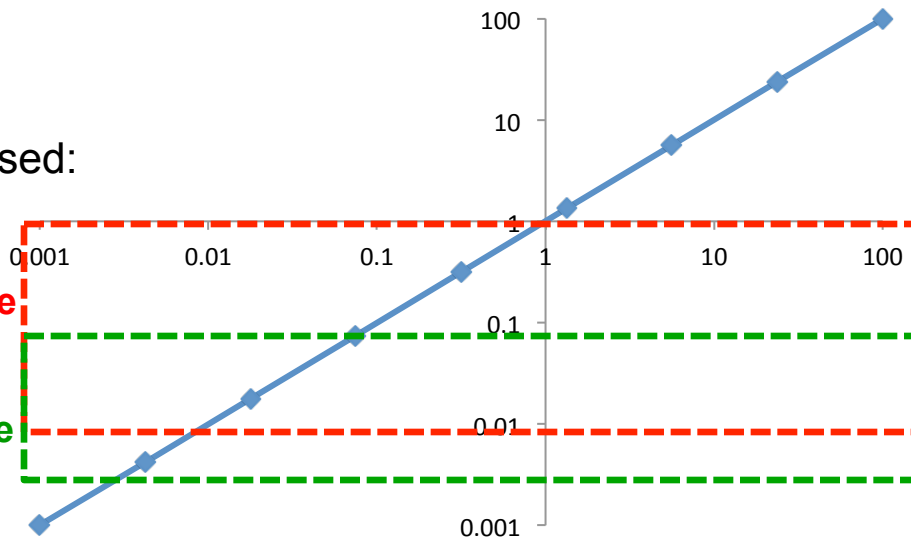

- Generate preliminary curves (16 pts)
- Pick a range and number of points to cover most peptides
- 4 process replicates

# Use of Response Curves



- Check for linearity
- Check for interferences
- Slope = 1; y-intercept = 0 for linear plots
- We do not currently use slope to correct quantitation values
- If peptide standards are used, assumptions are made about protein digestion efficiency

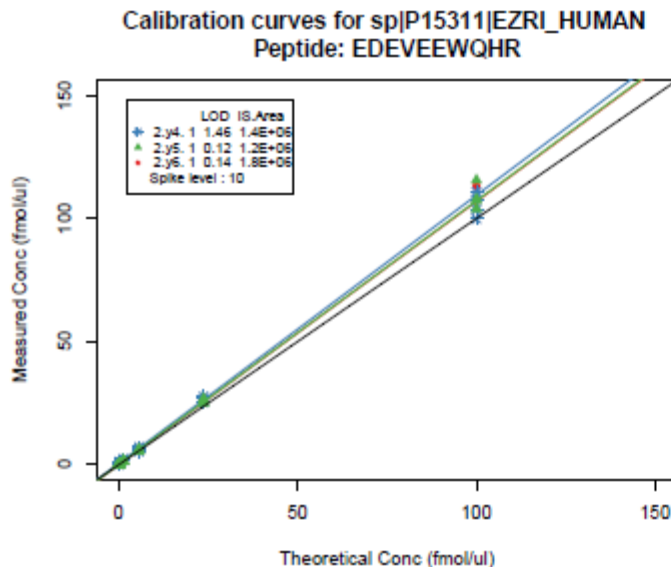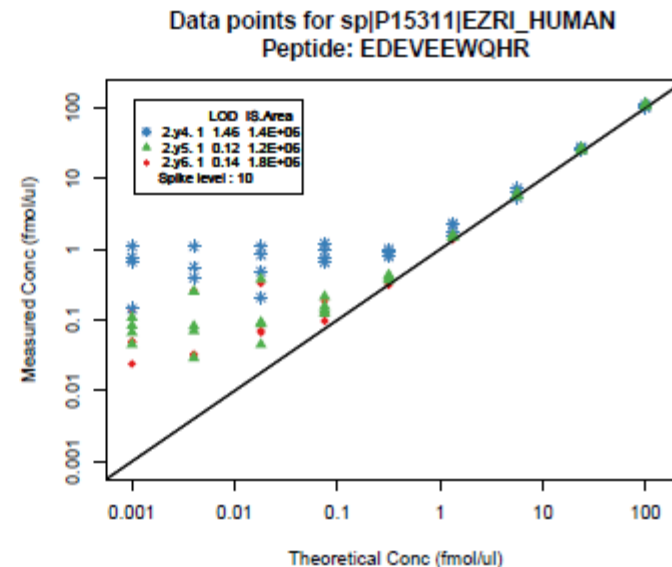

# Quantitation at the Transition Level

- Single “best” transition used
  - Stable
  - Intense
  - Interference-free
- Remaining transitions used for ID and interference check
- Is using only 1 transition acceptable or should the sum of transitions be used?

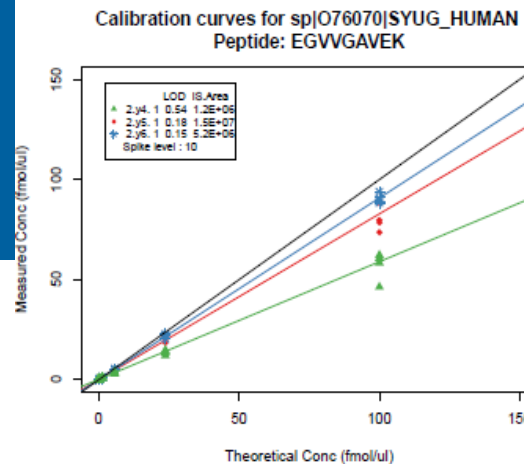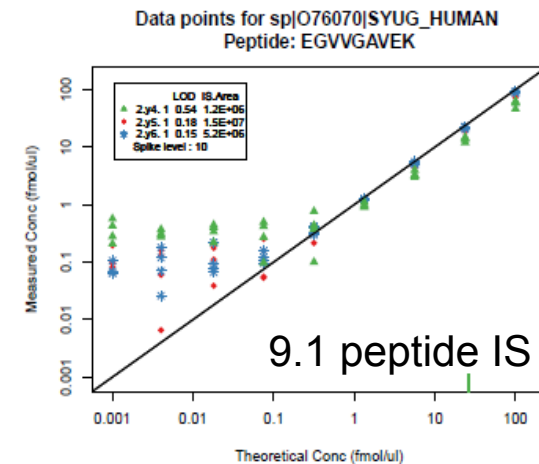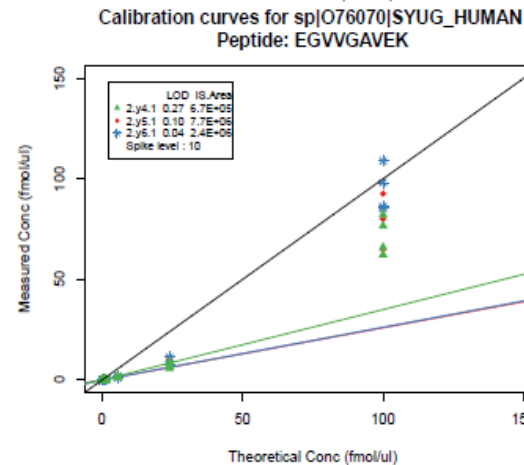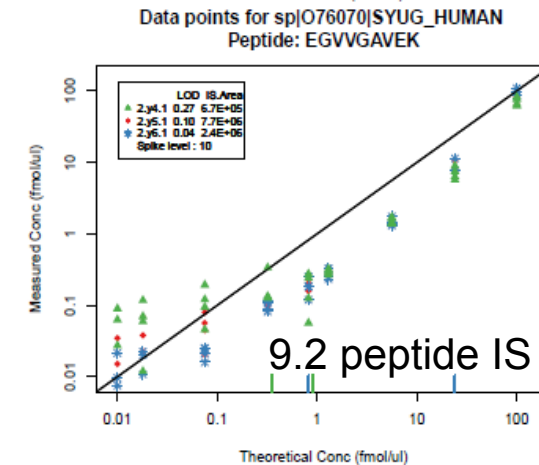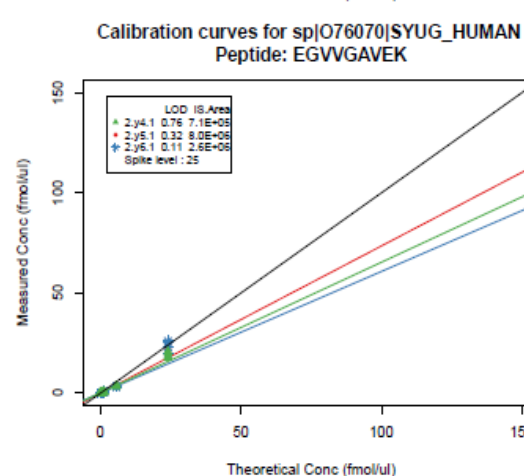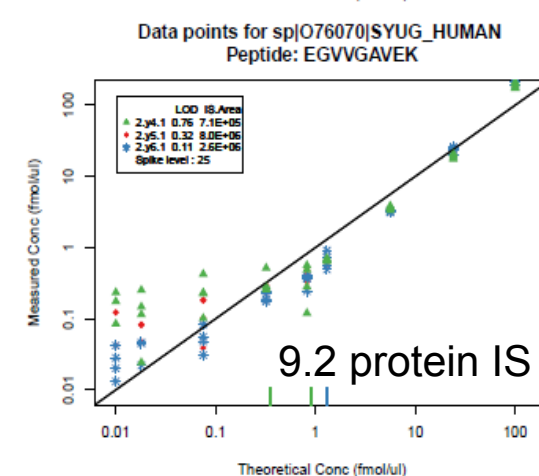

# Qualifying Assay Criteria



- LC-MRM-MS passes system suitability specifications
- Internal standards meet minimum signal threshold
- Peptides co-elute with internal standards
- Analytes and internal standards are interference-free
- Instrument performance and quantitative response is similar in inter-lab studies
- Digestion controls must be consistent in all samples

# Software

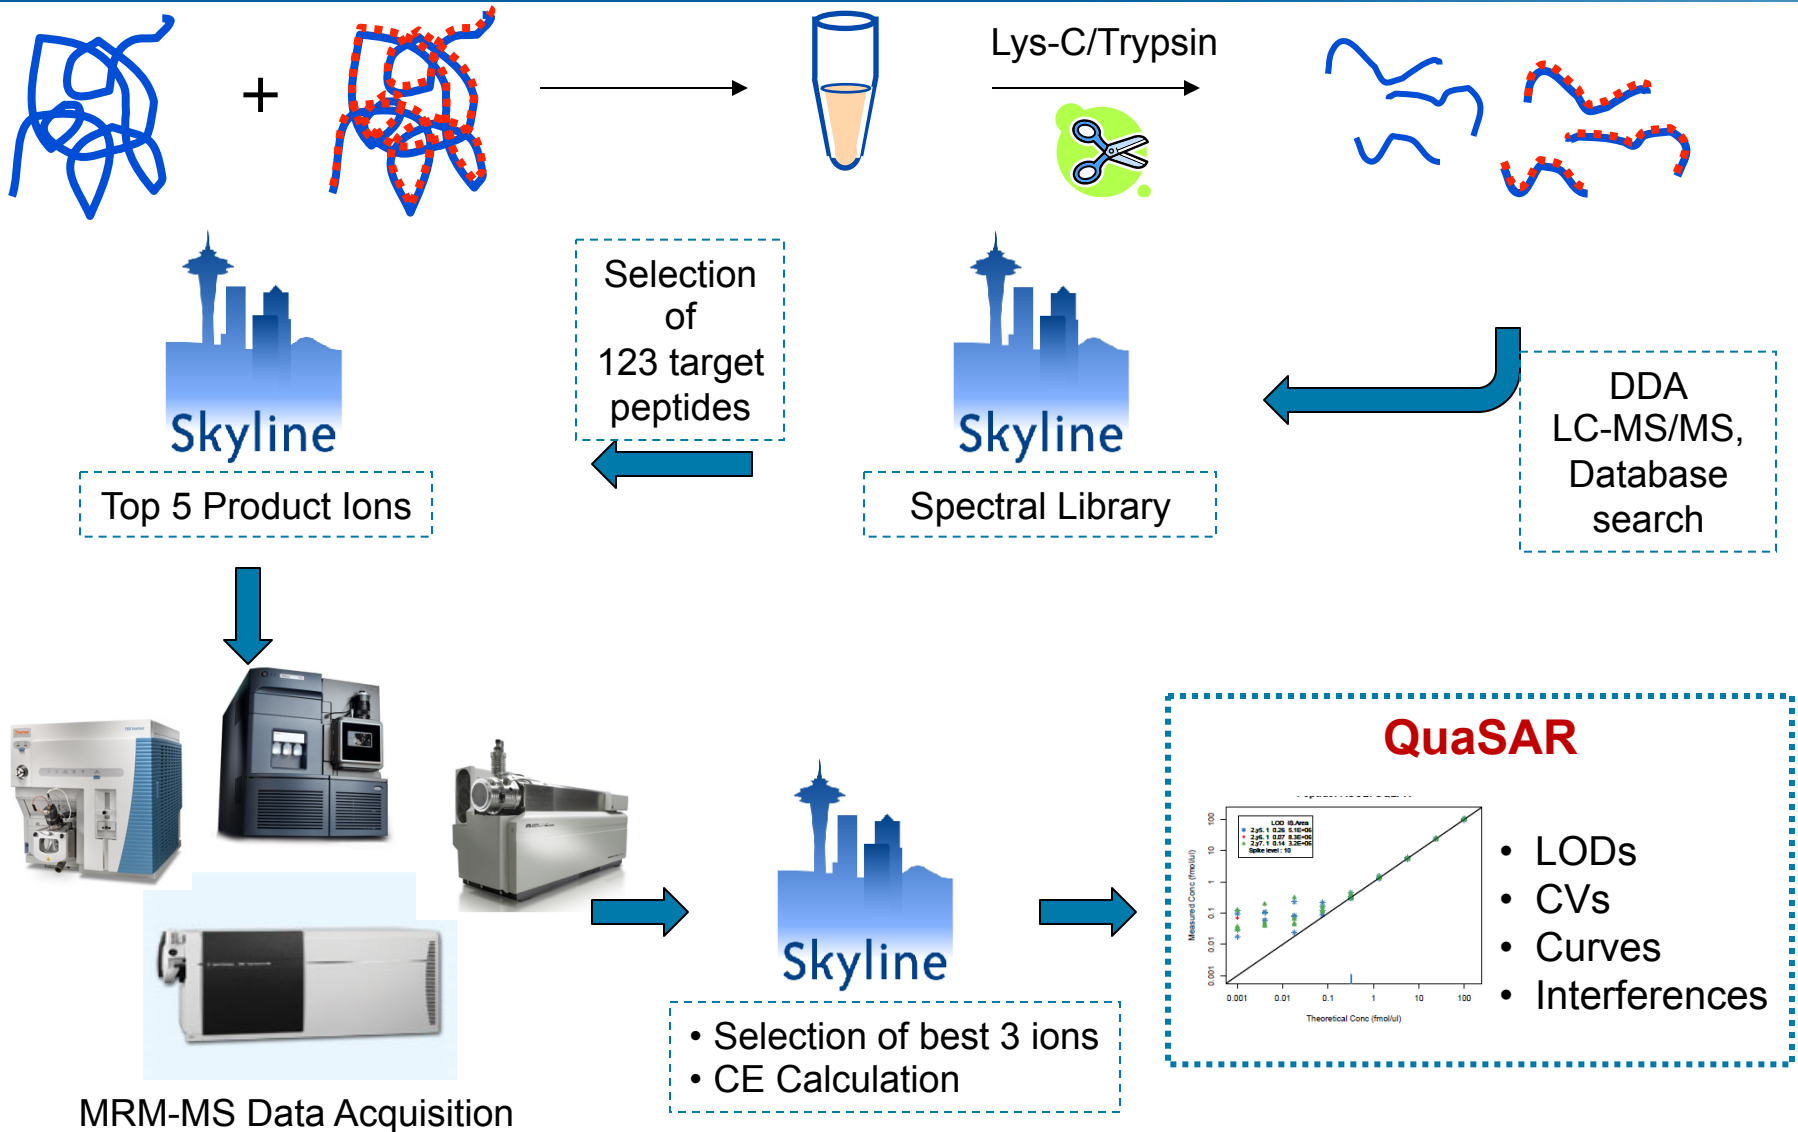

# Advantages and Disadvantages of This Approach

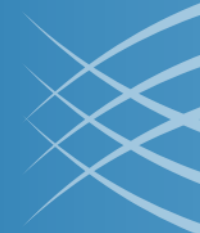

- Peptide ID is straight forward
- Interferences can be objectively determined
- Quantitation is based on a single transition
- Protein standards bring us closer to “accuracy”
- Multiplexing allows us to target many analytes in 1 injection
- External calibration is not used
- Cost of internal standards
- Accurately quantifying internal standards
- Quantitation is based on a single transition
- Protein standards are hard to come by
- Data quality must be high to quantify all analytes in 1 injection
- Assumptions regarding digestions are made
- Curves can take 3+ days to complete



# Study 9.1 – Blinded Sample Results



- Results across 13 sites showed good reproducibility
- Some sites showed differences in precision and accuracy
- Use of the system suitability and curves will help identify sources of variation

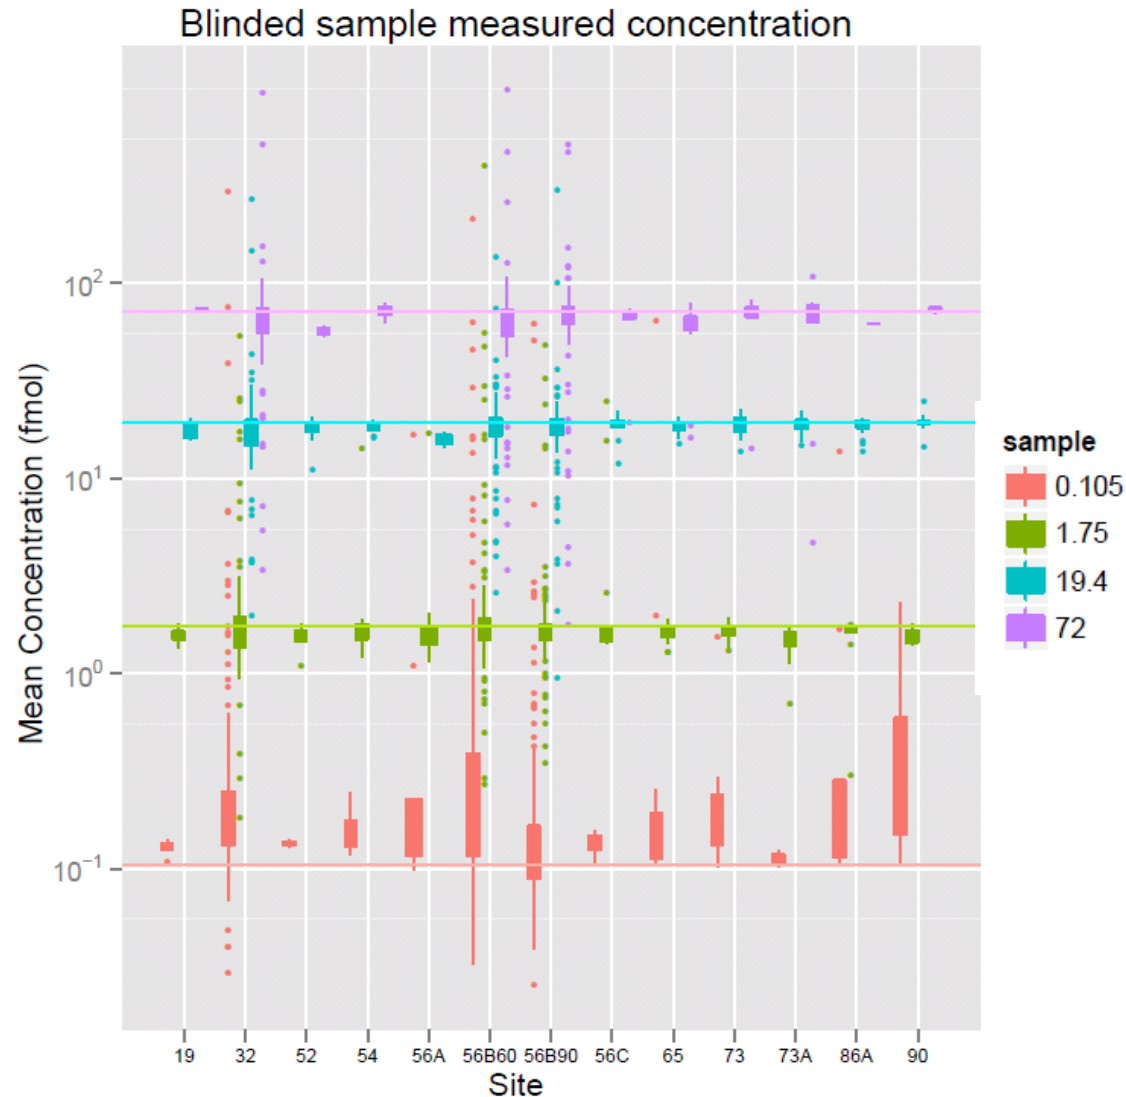

# “Fit-for-purpose” Tier 2 Biomarker Verification

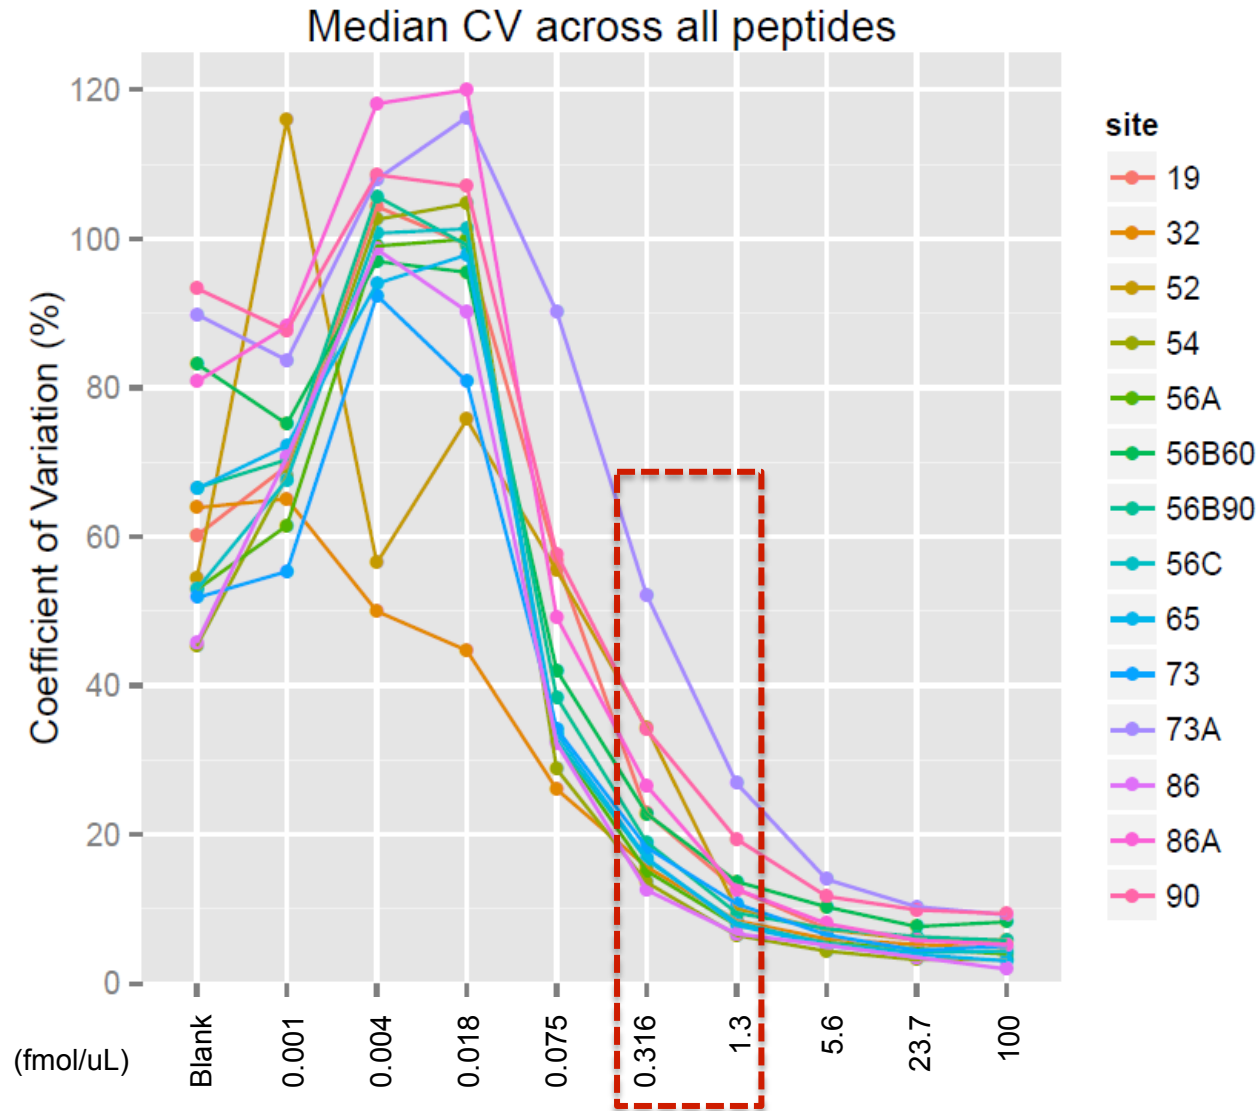

# Minimum Information Needed in Publications



- Complete disclosure of LC-MS methods used
  - Dwell time, cycle time, RT window, AGC target, etc
- Statistics or “calculations” section in the Methods
  - LODs, LOQs, precision, accuracy, response curves, etc
  - Cite methods of calculation
- How is quantitation being done?
  - # transitions used for quantitation
  - Peptides per protein: combined or reported separately
  - What assumptions are made?
  - How is the curve being used?
- Address interferences
  - How are data evaluated for interferences?

# CPTAC VWG Participants & Acknowledgements



**Broad Institute:** Susan Abbatiello, Terri Addona, Michael Burgess, Steven A. Carr, Hasmik Keshishian, Eric Kuhn, D.R. Mani, James Markell

**Buck Institute for Age Research:** Michael P. Cusack, Bradford W. Gibson  
Jason M. Held, **Birgit Schilling**

**Fred Hutchinson Cancer Research Center:** Amanda G. Paulovich, Jeffrey R. Whiteaker, Shucha Zhang

**Indiana University:** Mu Wang, Jong-Won Kim, Jimsan You

**Massachusetts General Hospital:** Steven J. Skates

**Memorial Sloan-Kettering Cancer Center:** Paul Tempst, Mousumi Ghosh

**National Cancer Institute:** Emily Boja  
Tara Hiltke, Christopher Kinsinger,  
Mehdi Mesri, Henry Rodriguez, Robert Rivers

**NISS:** Xingdong Feng, Nell Sedransk, Jessie Xia

**NIST:** Paul Rudnick

**New York University:** John Lyssand, Thomas A. Neubert, Åsa Wahlander, Sofia Waldemarson, Pawel Sadowski

**Plasma Proteome Institute:** N. Leigh Anderson

**Purdue University:** Charles Buck, Fred Regnier, Dorota Inerowicz, Vicki Hedrick

**University of California, San Francisco:** Simon Allen, Susan J. Fisher, **Steven C. Hall**,

**University of North Carolina:** David Ransohof  
**University of Victoria:** Christoph H. Borchers, Angela Jackson, Derek Smith

**University of Washington:** Michael MacCoss, Brendan MacLean, Daniela Tomazela

**Vanderbilt University:** Daniel Liebler, Kent Shaddox, Corbin Whitwell, Lisa Zimmerman

**Funding: National Cancer Institute**

## Targeted Proteomic Measurements in Biology and Medicine

---

Christoph Borchers

June 18, 2013

## Targeted MRM/MS Experiments

### Our Goals

- To rapidly and precisely quantitate a multiplexed panel of proteins in human biofluids using an absolute quantitative proteomic strategy.
- To verify and validate the candidate disease biomarkers toward clinical use.

### Projected Users

- Verification and validation → quantitative proteomic researchers in academic and industrial laboratories.
- Clinical implementation → technicians in clinical and pharmaceutical laboratories.

### Q/A

- Will MRM-based technology eventually replace ELISAs?  
MRM-based techniques are ideal for expediting the verification and validation phases of the protein biomarker pipeline. These will complement, but not replace ELISAs in the clinic.

## Confirmation of Analyte Signal

- We use stable isotope-labeled standard (SIS) peptides.
  - $^{13}\text{C}/^{15}\text{N}$  labeled standards are chemically identical to unlabeled counterpart and are distinguishable by mass only.

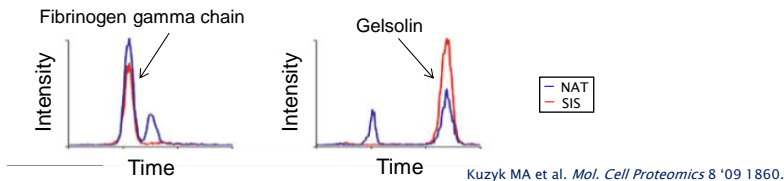

- 3 transitions/peptide empirically targeted for RT verification and interference screening in the control.
- 1 transition/peptide in the final MRM method.

### Q/A

- How else can the target peptide identities be confirmed?  
 Automated transition building from the intensities of untargeted discovery experiments (e.g., iSRM software Kiyonami et al. MCP '11).

## Ionization Suppression

- Correct for ion suppression and matrix effects through the use of  $^{13}\text{C}/^{15}\text{N}$  labeled analogs of the unlabeled analytes (peptides in our case).
- SIS peptides behave identically to their NAT counterpart in terms of chromatographic retention, electrospray ionization, and gas-phase fragmentation.
  - Produce same pattern of product ions.
  - Distinguishable by precursor and/or product ion  $m/z$  only.

### Question

- If labeled internal standards are so effective at alleviating ion suppression, why then is protein quantitation with them not yet universal?  
 Cost of the standards is a deterrent, while the reproducibility and transferability of the technique is a misconceived limitation.

# Interference Assessment

Approach with Normal Biofluid

- Monitor 3 MRM transitions/peptide form under matrix and matrix-free conditions.

## Criteria for Interference-free Transitions

- identical SIS and NAT retention times
- symmetrical and similar SIS and NAT peak shapes
- absence of co-eluting ion pairs
- 2 of 3 transitions must obey the above and have av. relative ratio between SIS in buffer, SIS in biofluid, and NAT in biofluid <20% CV

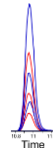

| Peptide (Protein) | Product Ion | Relative Ratios to $y_7^+$ |               |               | Av. Relative Ratio (%CV) |
|-------------------|-------------|----------------------------|---------------|---------------|--------------------------|
|                   |             | SIS in buffer              | SIS in plasma | NAT in plasma |                          |
| LSITGTDLK (AAT)   | $y_6^+$     | 0.56                       | 0.55          | 0.54          | 0.55 (2)                 |
| LSITGTDLK (AAT)   | $y_7^+$     | 1.00                       | 1.00          | 1.00          | 1.00 (0)                 |
| LSITGTDLK (AAT)   | $y_8^{2+}$  | 0.35                       | 0.35          | 0.40          | 0.37 (7)                 |

← Quantifier

# Interference Assessment

Approach with Unknown Biofluid Samples

- 1 transition/peptide
- $\geq 2$  peptides/protein

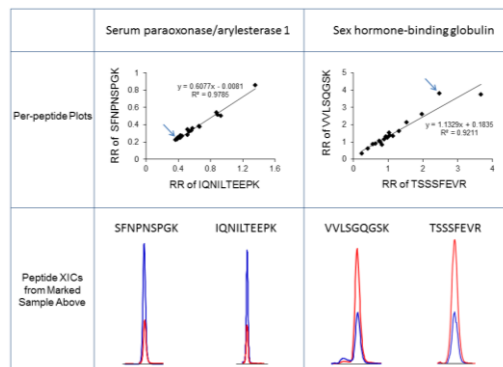

## Q/A

- What are the limitations of this approach?
  - Lengthy and manual data analysis.
  - Insufficient no. of peptides/protein may cause reliable peptides to be disqualified.

## Analyte Plex–level per Injection

- We typically target >100 peptides in a single run.
  - 348 peptides (149 plasma proteins) were recently targeted in a quantitative MRM analysis.  
*Percy AJ et al. Biochim. Biophys. Acta '13 in–press.*
- Robustness is independent of plex–level.
  - ➡ av. CVs <10% for signal and <0.05% for RT
- Equivalent protein concentration and LOQs are obtained.

### Q/A

- Is the ability to reach higher plex–levels a current technological limitation?  
It appears so. The 348 peptides targeted in a single run is pushing the current limits, whereby cycle times are <1 s and dwell times are sufficient to obtain ~10 points across the chromatographic profile of the reconstructed peptide.

## Assay Qualification Criteria

### Our Strategy

- rigorous 2–stage qualification of normal biofluid:
  - interference screening
  - std curve generation
- qualification of unknown samples:
  - interference screening

### Q/A

- How can the internal standards be effectively quantified?  
AAA and CZE

### Case Example

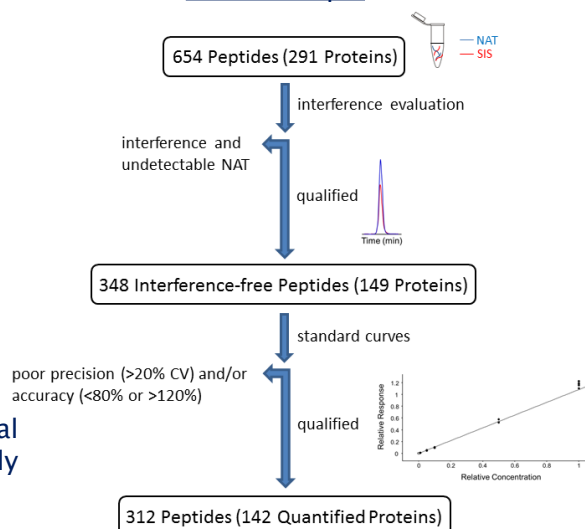



## Protein Quantitation Method

- We target each peptide's highest responding, interference-free MRM transition and multiple peptides per protein.
- Peptide standard curves are generated with control biofluid.

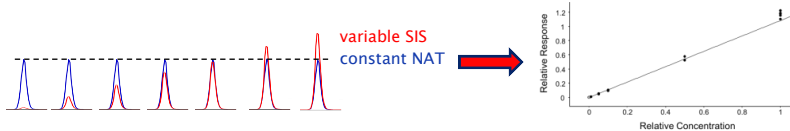

- A min. of 3 precise (<20% av. CV/level) and accurate (av. 80–120%/level) concentration levels must qualify to quantify.
- merits: multiplexing ability and sample throughput
- limitations: manual and laborious data analysis

### Q/A

- Is a single MRM transition sufficient for accurate quantitation after preliminary interference screening?  
Yes, since our qualification criteria for generating curves is strict. This enables precise and accurate protein quantitation.

## Use of Standard Curves

- Protein concentrations ( $NAT_{conc}$ ) in healthy and diseased samples are determined from regression equations of control.

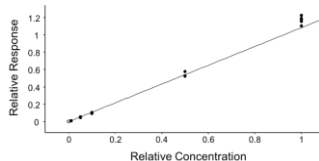

$$NAT_{conc} = \frac{SIS_{conc} \times m}{RR - b}$$

- RR is measured from the sample, while SIS concentration, slope, and y-intercept are all known values.

### Question

- What number of replicates for the concentration levels of the control and the unknown samples is appropriate?  
We use 5 replicates/level for the control and 1 replicate for the unknown, with blank injections in between.

## Determining Protein Concentrations

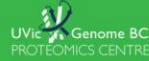

- Strict qualification criteria enables interference-free peptides to be precisely quantitated.
- Peptide acts as a surrogate for intact protein.
- Multiple peptides per protein are targeted with the highest determined concentration deemed representative of the protein concentration.
- Quantitative accuracy, based on ELISAs, is a challenge.

### Question

- Is applying correction factors to compensate for sample loss or poor digestion efficiency acceptable at the quantitation stage?  
Yes, if the recovery is known.

## Analytical Tools and Software

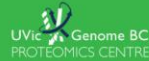

### Analytical Tools

- SPE → desalt and concentrate
- 1D and 2D RPLC → improve peak capacity
- MRM/MS on triple quadrupole → sensitive with wide DR

### Software

- vendor-specific → freeware cannot generate plots with NAT and SIS reversed
- Excel or IgorPro → figure and table generation

### Question

- Should vendor independent software for generating curves with quantitation based on regression equations be created?  
Yes, we are planning to develop this.

# Detail Required in Manuscripts

## Experimental Conditions

- Peptide/protein list and Uniprot accession numbers.
- Chromatographic details.
- Acquisition parameters and MRM transition lists.
- Linearity, sensitivity, and precision of quantitation.
- Protein concentrations.

## Verification of Results

- Qualification and quantitation criteria.

## Question

- Should raw data be uploaded into public databases?  
**Yes.**



# LC-MRM MS in Cancer Biology and Translational Research



↓

**Protein**

```

MAKQPSDVSS ECDREGRLQ PAER
TRSPQNPENHG
TRSPAPSPGPF
TRSPFLFIMRRSSLLSRSSGGYFSFD
TDRSPAPMSCDKSTQTPSPCCQAFN
HYLSAMASMRQAEPADMRPEIWIQAQ
ELRRIGDEFN AYYARVELN NYQAA
EDHPRMVLRLRLRYIVRLVWRMH
  
```

↓

**Peptide**



John Koomen, PhD  
Moffitt Cancer Center

Prepared for:  
Targeted Peptide Measurements in Biology and Medicine: Best Practices for Assay Development Using a “Fit-for-Purpose” Approach 06/2013

<http://proteome.moffitt.org/QUAD/>  
Remily-Wood *et al. Proteomics Clin Appl.* 2011, 5, 383.



## Customers

- Cancer Biologists
  - Evaluate Model Systems/Perturbations
    - Compare Cell Lines
    - Drug Effects
    - Pathway Activation
    - Confirmatory to Westerns, More Quant. Info
    - No Antibody, No Problem-Assay Development for New Analyte
- Clinicians
  - Measure Correlates in Clinical Trials
  - Develop Diagnostics/Prognostics
  - Signature of Drug Response/Therapeutic Escape
- Sponsored Research Agreement
  - Develop Commercial Assays for Implementation in Models & Tissues
    - Compare Against Other Methods: Precision, Accuracy, Linearity, Sensitivity

**MOFFITT CANCER CENTER**

## Resistance to B-RAF V600E Targeted Therapy in Melanoma

**Vemurafenib**

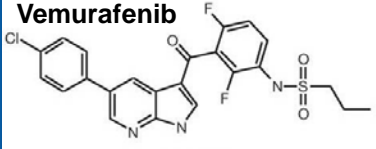


Pre-Tx Post-Tx

G. McArthur & R. Hicks  
MacCallum Cancer Center



Naive Resistant



Sosman *et al.* *N Engl J Med.* **2012**, 366, 707.  
Paraiso & Smalley. *Cancer Discov.* **2012**, 2, 390.

**MOFFITT CANCER CENTER**

## LC-MRM Quantification of Biomarkers of HSP90 Inhibition

**ClinicalTrials.gov: NCT01657591**

**XL888, Exelixis**

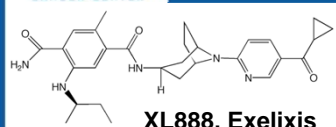


CT CT CT  
XL XL XL



HSP71  
HSP74  
CDC37  
HSP90A  
HSP90B

1 2 3 4 1 2 3 4 5  
vehicle XL888

Paraiso *et al.* *Clin Cancer Res.* **2012**, 18, 2502.

**HSP90 Clients**

- **MAPK:** ARAF, BRAF, CRAF, COT, p90RSK
- **RTK:** IGF1R, PDGFR
- **PI3K/Akt:** Akt, Raptor, S6, PDK1

| MW  | Peptides | Transitions |
|-----|----------|-------------|
| 250 | 33       | 178         |
| 150 | 145      | 697         |
| 100 | 250      | 1254        |
| 75  | 194      | 935         |
| 50  | 92       | 514         |
| 37  |          |             |
| 10  |          |             |



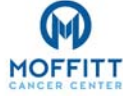

# Distribution of Experiments

- Cancer Biologists:
  - Measurements
    - Expression 80%
    - Modification (PO<sub>4</sub>, ABPP) 15%
    - Mutation 5%
  - Assay Type
    - Detection (not in LC-MS/MS) 5%
    - Relative Quantification 70%
    - Absolute Quantification 25%
      - Normalized to Housekeeping Protein (GAPDH) to Compare to Western
  
- Clinicians and Commercial Development
  - Measurements
    - Expression 95%
    - Phosphorylation 5%
  - Assay Type
    - Absolute Quantification 100%
      - Evaluation against Quality Control Standards (Normalize and/or Drop Data)

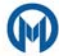

# LC-MRM Assay Development

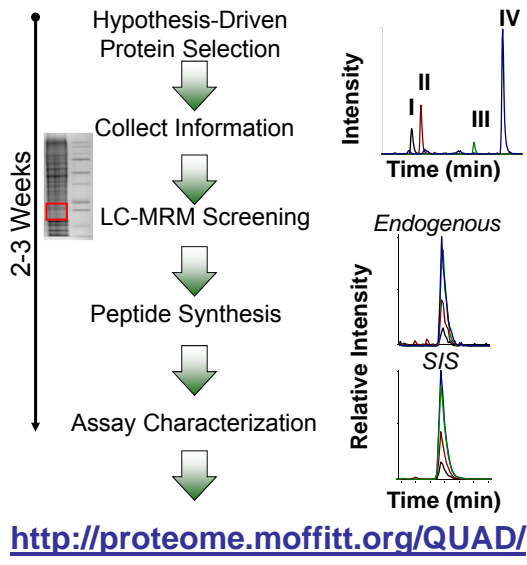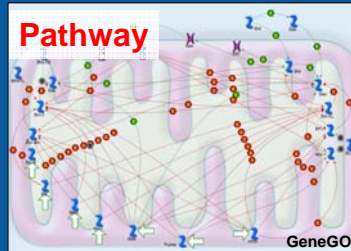

**Protein**

MAKGRDVSQ FQDREGRLQ PAERPPQLRPGAPTS  
 GEGDSCPHGSPQGFLAPPASP  
 GPRATCSPLRPIRIRSSLLSRSSSYFSFDTRSPAP  
 RSSLLSRSSSYFSFDTRSPAP  
 MSCDKSTQTPSPPCQAFNHYLSAMASMRQAEPADM  
 RPEIWIQAQLRRIGDEFN AYTARVFLN NYQAAEDHP  
 RMVILRLRYIVRLVWRMH

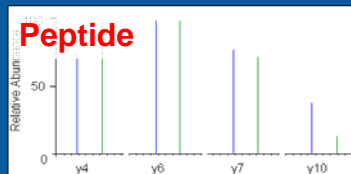

Remily-Wood et al. *Proteomics Clin Appl.* 2011, 5, 383.

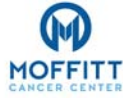

## Software

- Assay Setup
  - TSQ and Xcalibur (Historical)
  - Skyline<sup>1</sup>
  - LC-MS/MS Data Pipeline: Sequest, TPP<sup>2</sup>, Skyline
  - Uniqueness: iPIP (in-house), BLAST, Databases
- Data Acquisition
  - TSQ and Xcalibur (Thermo)
- Data Analysis
  - QuanBrowser (Historical, Mainly Cal. Curves)
  - MRMer (Historical)<sup>3</sup>
  - Skyline
- Statistical Analysis
  - MatLab, R (Y. Ann Chen)

1. MacLean B, et al. *Bioinformatics* 2010, 26, 966.
2. Deutsch EW, et al. *Proteomics* 2010, 10, 1150.
3. Martin DB, et al. *Mol Cell Proteomics* 2008, 7, 2270.

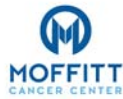

## Standards and Transitions

**BRAF-IGDFGLATVKSR**

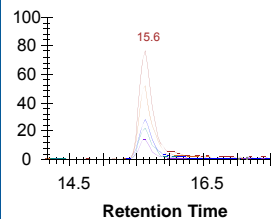

**CTNB1-AIPELTK**

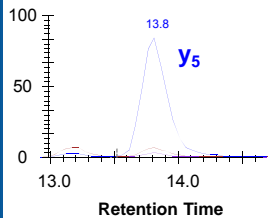

- SIS Peptides for Best Protein Expression Assay (1<sup>o</sup>) and for Unmodified and Modified Peptide Pairs
- Single Conservative Amino Acid Replacement for 2<sup>o</sup> Protein Expression Assays\*
- Exploring Use of SIS Proteins and Mutant Proteins as Standards
- 3-5 Transitions Per Peptide
  - Detection > Peak Shape > Ratios Correct
- Transitions Selected for Quantification
  - **All**: Detected and Each Above 10% Base Peak
  - **Single Most Intense**: Other Fragments Detected at Threshold or Poor Peak Shape
  - **Just Those Detected**: No Better Choice and No More Sample

\*Remily-Wood and Koomen. *J Mass Spectrom.* 2012, 47, 188.

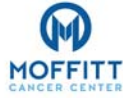

# Standard Curves: ER $\alpha$ -LASTNDKGSAMESAK

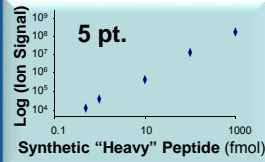

12 Point Calibration Curves with Synthetic Peptides

In Buffer

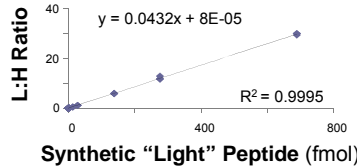

In Matrix

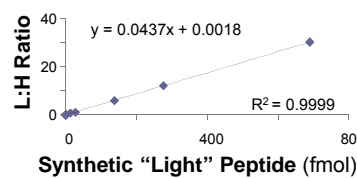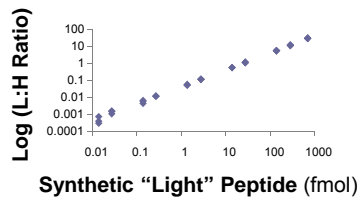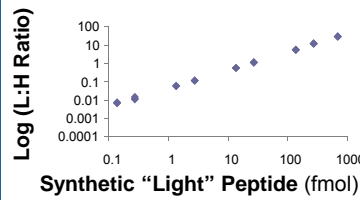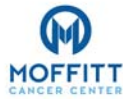

# Peptide ID and Verification

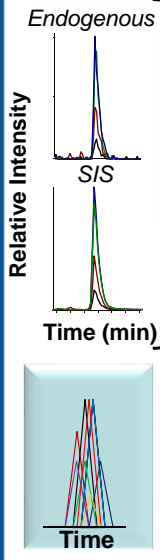

- Start from Defined Biological Question ( $\rightarrow$  peptide)
- LC-MRM Screening Method
  - Enrich Protein
  - Screen "Usual Suspects"
- Depending on "Poor MS/MS with Few Fragments"
  - Comparison to Internal Standards (Tier 2)
  - Transition Ratios
    - Tier 2: Comparison Against Standard and/or Quantification (+/- 5%)
    - Tier 3: Ranking or "Eyeball Test" in Skyline
  - Retention Time
    - Tier 2: Comparison Against Standard
    - Tier 2/3: Correlation of LC-MS/MS and LC-MRM Elution Times
    - Tier 3: LC-MRM Data "Eyeball Test" - Plot Data and Peaks from All Samples Must Overlap



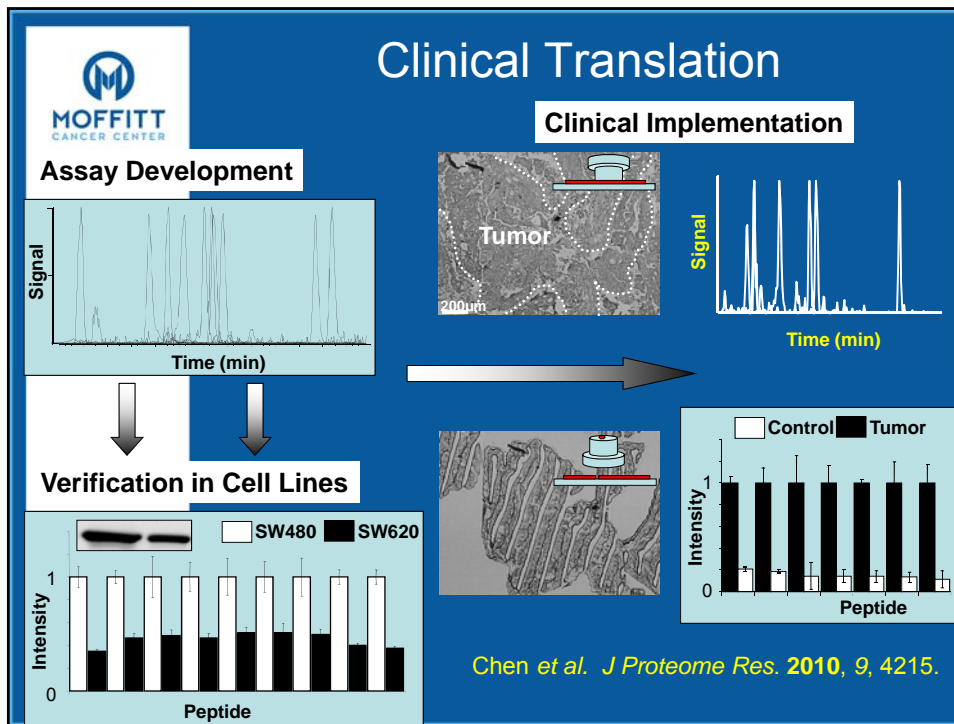

**MOFFITT  
CANCER CENTER**

## Development Milestones

- Matching Endogenous and SIS Peptide RT and Transition Ratios
- Compare Data Against Other Method in Known Biological System
  - Westerns
  - ELISA
  - Nephelometry (Other Antibody-Based Techniques)
- Translation to Clinical Specimens

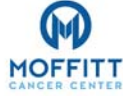

# Analyte Multiplexing

- **Unscheduled (TSQ Quantum Ultra and Vantage, Thermo)**
  - Limit of Peak Sampling: ~30 peptides
  - Gradient (30 min)
- **Scheduled (Vantage, Thermo)**
  - Limits of Peak Sampling
    - 400 Peptides for Relative Quantification (Tier 3)
    - 32 Proteins: 250 Peptides with 1,254 Transitions
    - Dependent on Peptide Hydrophobicity
  - Gradients up to 90 min (Tier 3 Assays)
- **Combining Assays**
  - Prefractionated Protein
    - SDS-PAGE
    - Affinity Enrichment
  - Loss from Less Material, Not Sampling and Not Interferences
  - CV, LOD, LOQ due more to Sample Type/Matrix Background, not Multiplexing

20 ms/Transition  
>7 Samples/Peak

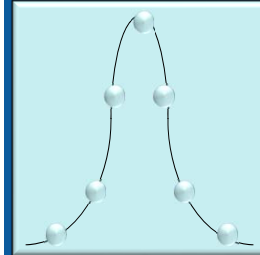

20 seconds

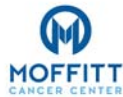

# Detection of Interference

- Peak Shape
- Transition Ratio Measurements
- Interventions:
  - Omit Transitions
  - Add New Transitions
  - Lengthen Gradient
  - Narrow Quad Resolution?
  - Drop Data and Redefine Strategy for Protein Enrichment

CADH1-VTEPLDR  
(SIS)

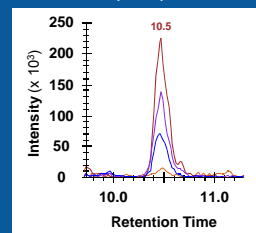

CADH1-VTEPLDR  
(Endogenous)

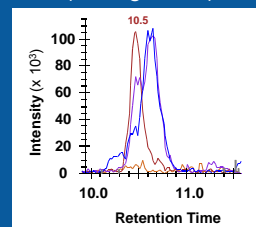

## Ion Suppression

- Compare to SIS/Review SIS Peptide Signal

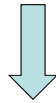

- Enrichment
  - Fractionation
  - IP
  - IMAC
  - IEF
  - ABPP

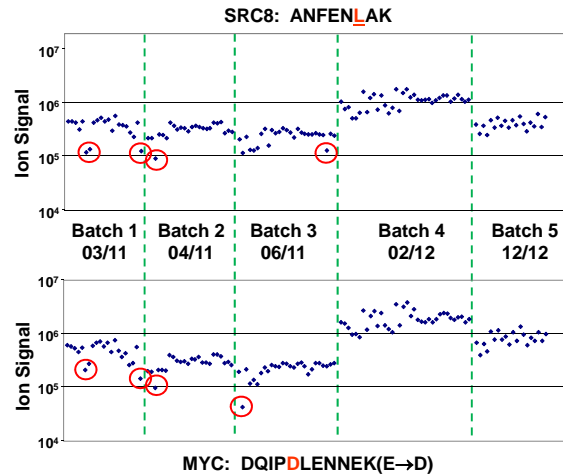

## Which Peptide(s) are Best?

- Peptides per Protein
  - n = 1-14 including Modified Peptides
- If they Disagree?
  - Homework:
    - Modified or Mutated?
    - Location in protein? Accessible for Digestion?
    - Size? Hydrophobicity? Difficulty in Recovering Peptide?
    - Repeated Sequence?
  - Significance by T-test or ANOVA
  - Monitor Ratio to Others
- Defer to Best Peptide (with SIS)

# LC-MRM of ER Peptides

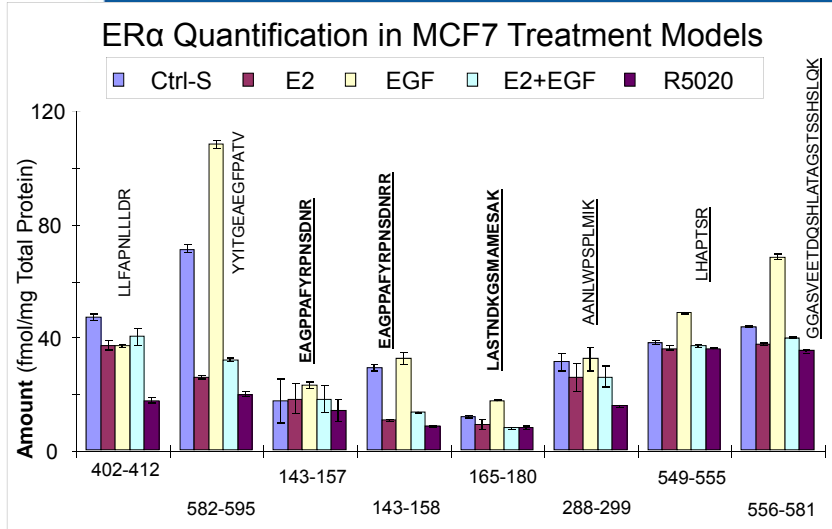

# Accuracy of Quantification

- Use of SIS Proteins
- Comparison against ELISA for Multiple Proteins
  - Slopes, Intercepts, R<sup>2</sup> Values

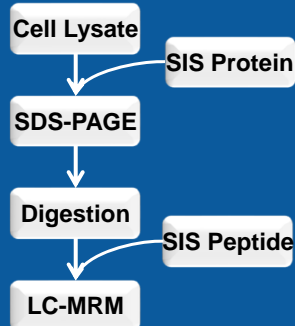

| Quantitative Comparison  | SIS Peptide  | SIS Protein  |
|--------------------------|--------------|--------------|
| <b>SRC Amt (fmol/mg)</b> | 19.17 ± 0.32 | 28.36 ± 1.14 |
| <b>CV</b>                | 1.6%         | 6.0%         |
| <b>Difference</b>        | ---          | + 48%        |
| <b>p value</b>           | ---          | 0.008        |

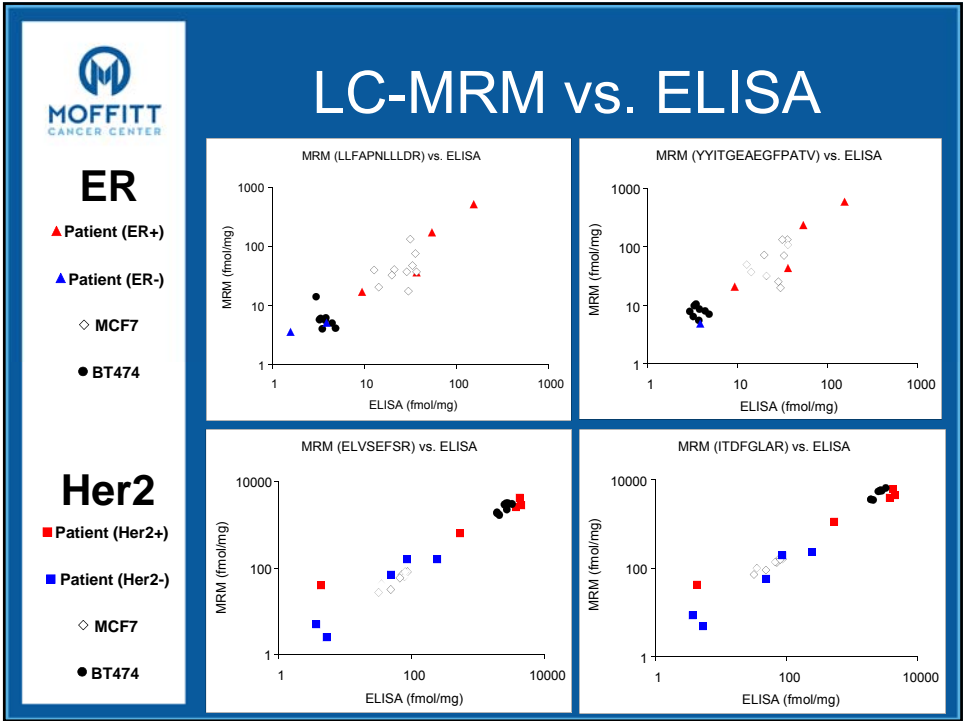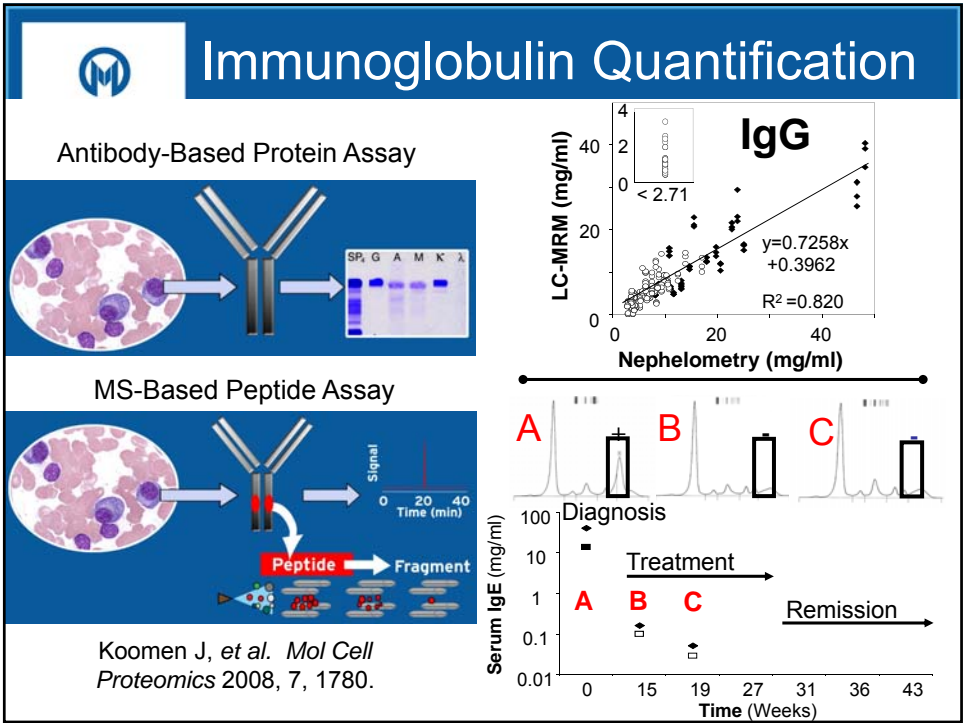



# MIAMRME

- Pathway, Protein, Peptide, Transitions
  - Method for Peak Selection/*in silico* evaluation of uniqueness?
  - Export Transition List from Acquisition Software
- Internal Standard Sequence, Mass, *etc.*
- Level of Multiplexing
- Purification/Enrichment Method
- Digestion Method
- QA/QC Standards and Metrics
- Instrument Settings
- Peaks Selected for Quantification and Rationale
- Data Normalization Method
- Evaluation of Sample-to-Sample and Batch-to-Batch Variability
- Comparison to Other Techniques (when available)

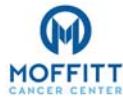

# Acknowledgments

## Koomen Lab/Proteomics

Yi Chen, PhD  
Elizabeth Remily-Wood  
Yun Xiang, PhD  
Bin Fang, PhD  
Wei Guan  
Victoria Izumi  
Robert Sprung, PhD

## Colon Cancer

David Shibata, MD  
Erin Siegel, PhD  
Timothy Yeatman, MD  
Domenico Coppola, MD  
Emina Huang, MD (UF)

## Lung Cancer

Eric Haura, MD  
Jiannong Li, PhD  
Guolin Zhang, PhD  
Lanxi Song, MS

## Multiple Myeloma

William S. Dalton, MD PhD  
Ken Shain, MD PhD  
Lori Hazlehurst, PhD  
Rachid Baz, MD  
Kaaron Benson, MD

## Biostatistics and Cancer Informatics

Y. Ann Chen, PhD  
Kate Fisher  
Steven Eschrich, PhD  
Richard Liu  
Eric Welsh, PhD

## Breast/Proteome Sciences

Anthony Magliocco, MD  
Heather Han, MD  
David Britton, PhD  
Ian Pike, PhD

## Promega

Mike Rosenblatt, PhD  
Robin Hurst, PhD

## Melanoma

Keiran Smalley, PhD  
Vernon Sondak, MD  
Jane Messina, MD  
Kim Paraiso  
Eirik Haarberg

Funding: R01-CA077859, R21-CA152345, U54-CA143970, R01-CA161107, R01-CA123174, Lung SPORE P50-CA119997, R21-CA141285, CCSG P30 CA076292, UF-Moffitt Partnership, US Army DoD National Functional Genomics Center, Florida DoH Bankhead Coley Cancer Research Program, Proteome Sciences, Promega

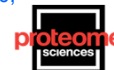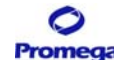

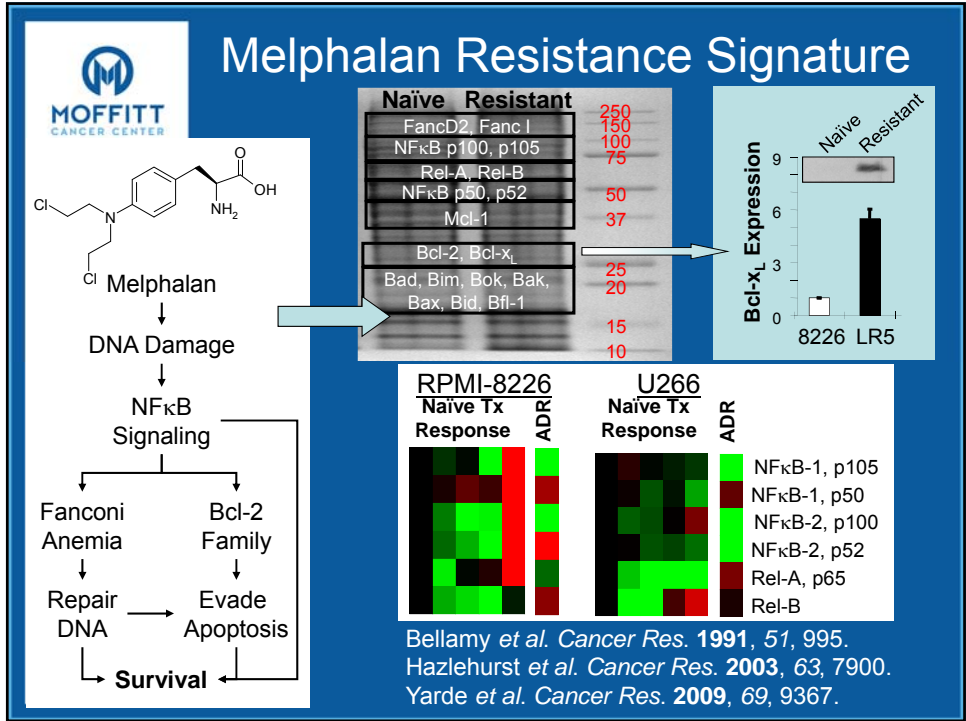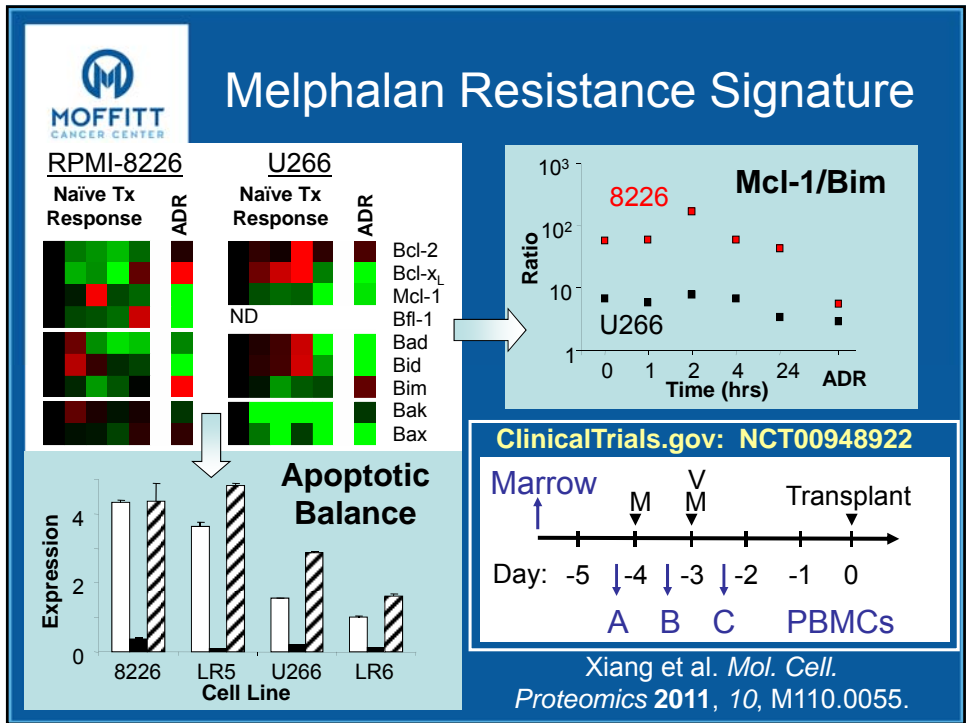

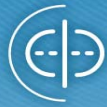

# Best Practices for PRISM-SRM Assay Development

Tao Liu, Ph.D.

Pacific Northwest National laboratory

6/18/2013

## PRISM-SRM workflow

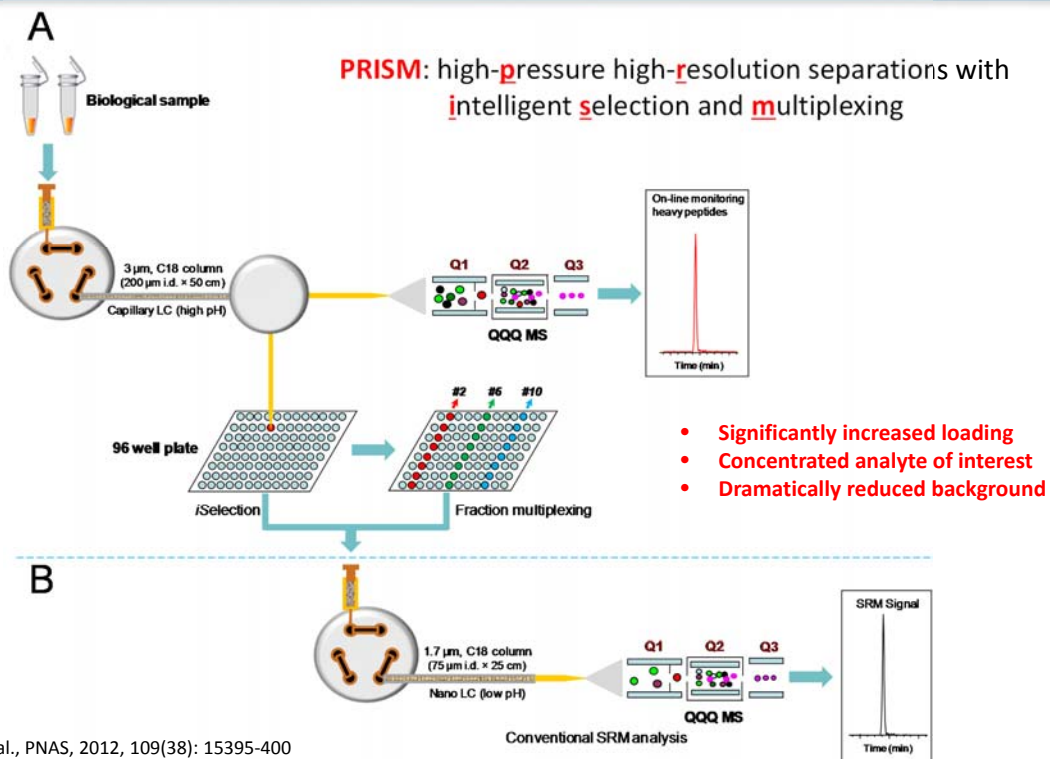



# Typical figures of merit for PRISM-SRM assays

- **LOD (S/N>3):**
  - 50-100 pg/mL with IgY14
  - 0.3-1 ng/mL without IgY14
- **LOQ (S/N>10):**
  - 50-300 pg/mL with IgY14
  - 0.5-5 ng/mL without IgY14
- **CV: <10%**

Table 1. Summary of the LOD and LOQ of four target proteins in female plasma with IgY14 only and IgY14-PRISM

| Proteins                              | Surrogate peptides   | Fractionation strategies | LOD, ng/mL | LOQ, ng/mL |
|---------------------------------------|----------------------|--------------------------|------------|------------|
| Bovine carbonic anhydrase             | DGPLTGYR             | IgY14 only               | 5          | 10         |
|                                       | DFPIANGER            | IgY14 plus PRISM         | 0.05       | 0.5        |
| Bovine $\beta$ -lactoglobulin         | VLVLDTDYKK           | IgY14 only               | 5          | 10         |
|                                       |                      | IgY14 plus PRISM         | <0.05      | 0.05       |
|                                       | VYVEELKPTPEGDLEILLQK | IgY14 only               | 5          | 10         |
|                                       |                      | IgY14 plus PRISM         | <0.05      | <0.05      |
| <i>E. coli</i> $\beta$ -galactosidase | VDEDQFPFPAVK         | IgY14 only               | 10         | 25         |
|                                       |                      | IgY14 plus PRISM         | 0.5        | 5          |
|                                       | LWSAEIPNLYR          | IgY14 only               | 10         | 100        |
|                                       |                      | IgY14 plus PRISM         | 0.05       | 0.1        |
| PSA                                   | IVGGWEcamCEK*        | IgY14 only               | 25         | 100        |
|                                       |                      | IgY14 plus PRISM         | 0.05       | 0.1        |
|                                       | LSEPAELTDAVK         | IgY14 plus PRISM         | <0.05      | <0.05      |

\*Cysteine was synthesized as carbamidomethyl cysteine.

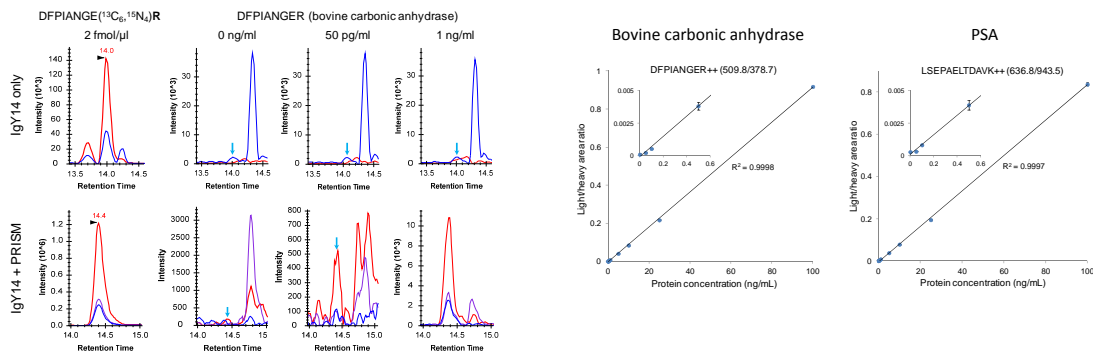

3

# Improved throughput in PRISM-SRM

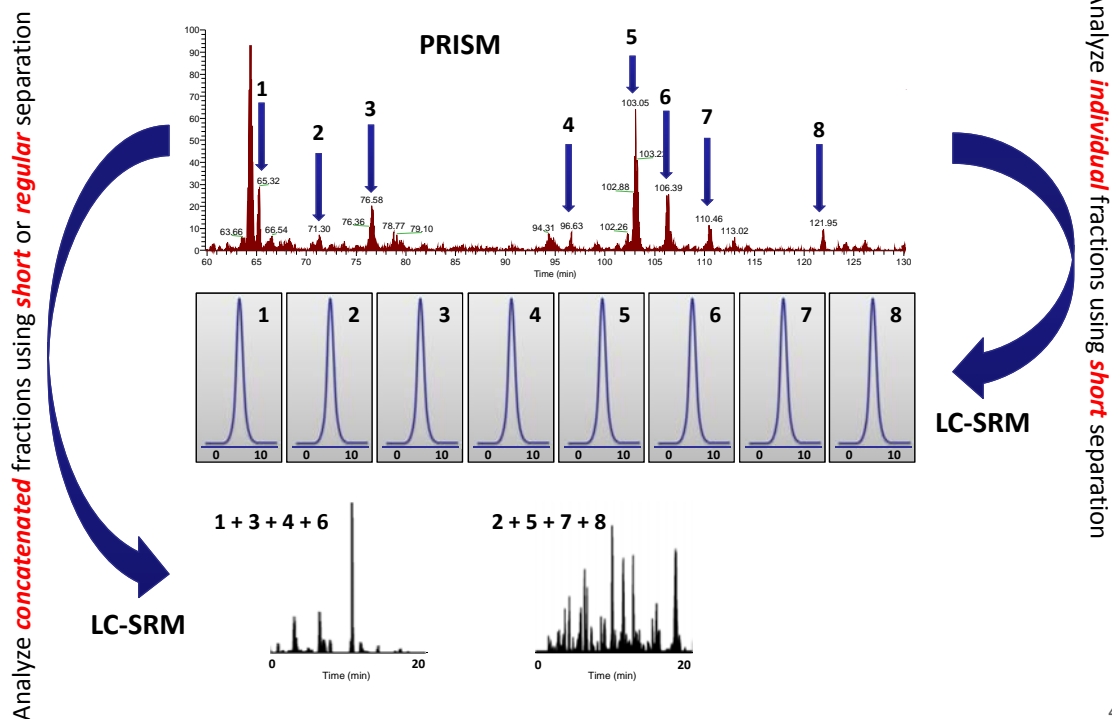

4

## Q/A: Experimental goals and applications

- What are the goals of the targeted MS experiments? Who are the likely users of the methods and results?
  - Experimental goals:** To sensitively and precisely quantify the concentration(s) of peptide(s) in a tryptic digest of a complex protein matrix, but not the accurate amount of the protein in the original sample
  - Applications:** Verification of low abundance biomarker candidates (e.g., fusion protein products); highly sensitive quantification of proteins and PTMs (e.g., phosphorylation) in systems biology

Quantitation of TMPRSS2-ERG fusion proteins in prostate tumor tissues

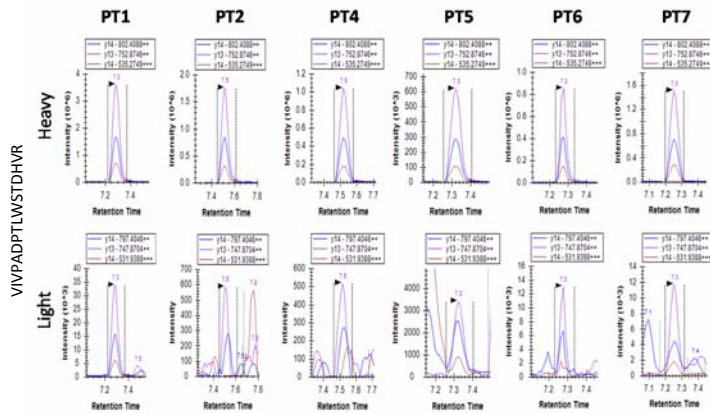

Phosphorylation stoichiometry of ERK1

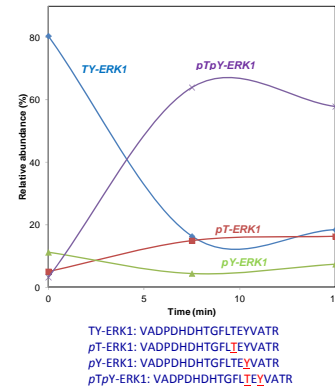

5

## Q/A: Effects of concatenation/pooling

- What is the typical range of analyte plex-level per-injection? What is the impact of the plex-level used on performance of the PRISM-SRM assays?

Depleted plasma, regular gradient

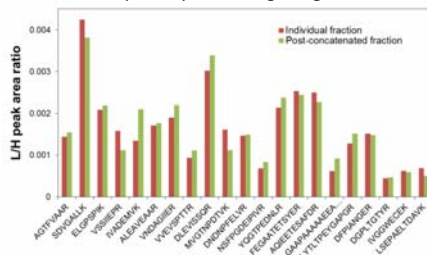

Non-depleted plasma; regular gradient

| Surrogate peptide (best transition) | Pooling fraction |         |        | Individual fraction |         |        | Relative error (%) |
|-------------------------------------|------------------|---------|--------|---------------------|---------|--------|--------------------|
|                                     | S/N              | L/H     | CV (%) | S/N                 | L/H     | CV (%) |                    |
| DGPIGTYSR (490.2/597.3)             | 2.7              | 0.00380 | 25.4   | 2.8                 | 0.00323 | 11.1   | 17.6               |
| DFPIANGSR (509.8/378.7)             | 13.1             | 0.00130 | 3.6    | 17.1                | 0.00138 | 1.5    | 5.7                |
| VLVLDTDYK (597.3/981.5)             | 33.4             | 0.0253  | 7.6    | 82.5                | 0.0279  | 15.9   | 9.0                |
| IVGGWECEK (539.2/865.3)             | 18.3             | 0.00224 | 28.6   | 25.9                | 0.00210 | 1.2    | 6.7                |
| LSEPAELTDAVK (636.8/943.5)          | 20.9             | 0.00167 | 18.8   | 30.8                | 0.00204 | 17.0   | 18.5               |

- Typical plex-level in PRISM-SRM: 5-30 (can be much larger)
- Concatenation to >10 fractions has minimal impact
- Accuracy is largely unaffected
- Impact on precision is evident for LLOQ level analytes
- Impact on sensitivity is matrix- and separation-dependent:
  - potential non-characteristic loss in pooling and concentration steps
  - less impact in depleted plasma (vs. non-depleted plasma)
  - pooling followed by short separation diminishes signal by 1/3 to 2/3

Tumor tissue; short gradient

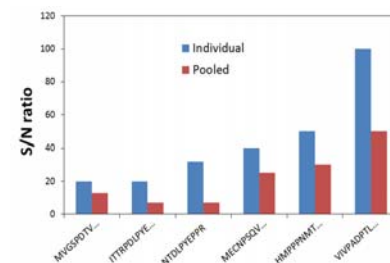

6

## Q/A: Confidence of measurements

### ❑ How is the confidence of measurements established?

- Through matching to transition profiles (>3 transitions) and LC elution of heavy isotope-labeled internal standards
- PRISM separation (basic pH RPLC) with online monitoring adding another level of confidence (i.e., orthogonal with 2<sup>nd</sup> dimension acidic pH RPLC separation)
- Increased confidence by monitoring more transitions (e.g., iSRM, QTRAP)
- Confidence further established through titration (response curve)

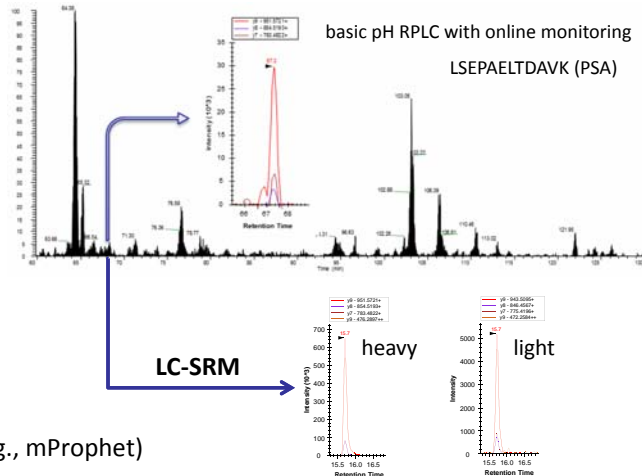

### ❑ How do these methods differ from those in “Discovery Proteomics”?

- Confidence typically governed by use of internal standard
- Usually does not have full spectrum
- No well-established scoring algorithm (e.g., FDR); new tools are emerging (e.g., mProphet)

7

## Q/A: Quantification method

### ❑ Explain the method of quantification.

- Peptides are quantified through Light/Heavy ratios (peak area) and response curves
- All transitions are checked for potential interference (e.g., AuDIT)
- The most sensitive transition is used for quantification
- “Crude” peptides can be used for comparative studies

### ❑ Discuss the capabilities and limitations of the approach.

- **Strength:** use of internal standards mitigates many issues that could affect quantitation accuracy (e.g., sample prep and instrument analysis reproducibility)
- **Limitations:** 1) synthetic heavy peptide standards are required for PRISM-SRM; 2) cost is high if purified and accurately quantified internal standards are used; 3) 3-5 weeks lead time for peptide synthesis; 4) not “true” absolute quantitation

8

## Q/A: Use of standard curves

- If you generate standard curves (calibration or response curve), explain how you use them to assess the quantitative accuracy of the assay.
  - The slope and y-intercept from the curve regression are used in calculating the analyte concentration in a sample (**process** replicates for at least one of the data points)
  - External calibration can be used, but is not required
  - Correlation to other measurements (e.g., ELISA) can be made

### PRISM-SRM analysis of PSA in non-depleted female plasma

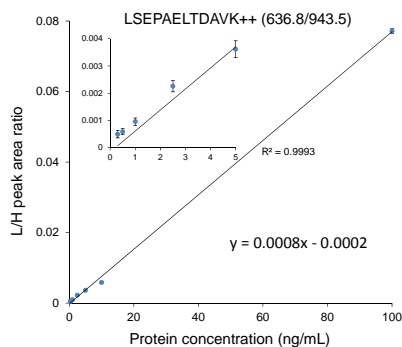

\*60% of immunoreactivity of spiked PSA could be lost due to complexation to A2M in plasma; SRM is detecting true "total PSA"

9

## Q/A: Detecting interference

- What methods are use to establish presence of interferences? How do you deal with them if detected?
  - Check heavy transitions in both buffer and matrix; compare light and heavy in matrix using AuDIT
  - If interference detected, either change transitions or refine LC gradient (e.g., long gradient)

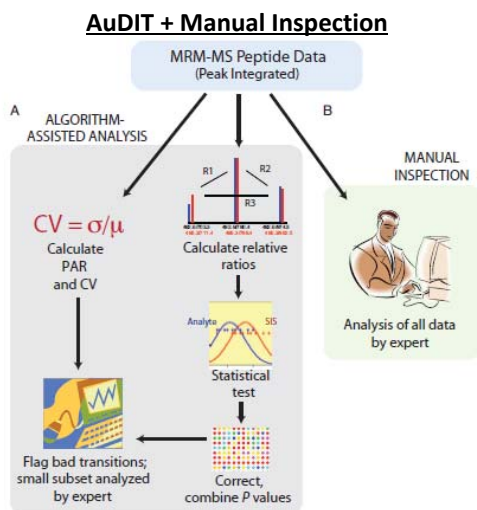

Abbatello et al., Clin Chem, 2010, 56:2, 291-305

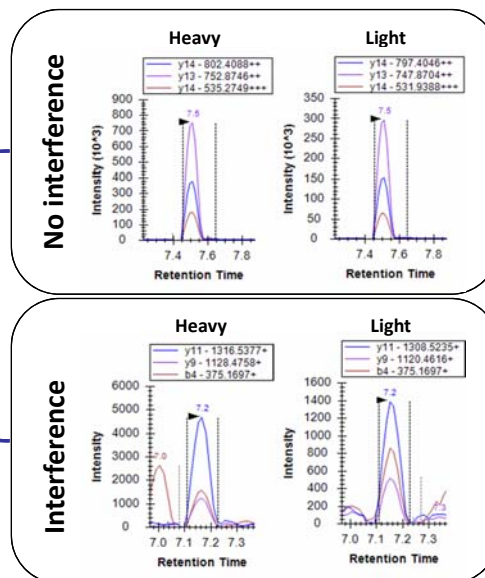

10

## Q/A: Data analysis tools; ionization suppression

- ❑ **What software and analytical tools do you use in your studies and why?**
  - In-house programs are used for peptide selection from our own data repository
  - Skyline and in-house algorithms are used for transition selection (e.g., analysis of Orbitrap LC-MS/MS data) and CE optimization (e.g., direct infusion, CE ramping in scheduled SRM)
  - Skyline is used for LC-SRM scheduling and method generation
  - Skyline is used for data visualization and quantification
  - Skyline is used for data sharing (Panorama is being tested)
  
- ❑ **How do you account for suppression of ionization in your quantification method?**
  - Because heavy isotope-labeled internal standards are used throughout PRISM-SRM analysis, we do not need to account for suppression of ionization

11

## Q/A: “Bottom-up” protein quantification

- ❑ **Can you provide a useful estimate or accurately determine the amount of protein in the matrix based on the measured levels of peptides? Explain how/why. Indicate experimental parameters such as number of peptides per protein and the criteria/computational tools applied.**
  - The amount of proteins in the matrix can be estimated:
    - use protein and heavy isotope-labeled peptide when building response curve (2-3 peptides; spike-in samples go through the entire sample prep process)
    - if protein standard is not available, measure the same actual clinical samples using both PRISM-SRM and other measurements (e.g., ELISA) and establish calibration curve
  
- ❑ **If you have multiple peptides from the same protein and each gives a different answer for the extrapolated protein level, how do you deal with this?**
  - Make sure there is no potential PTM site (e.g., phosphorylation, N-glycosylation)
  - Check protein isoform information
  - Check if there is potential motif that inhibits trypsin digestion
  - Cheer up, some great discovery might have been made!!!

12

# An example: protein isoforms

## Pro-platelet basic protein (PPBP)

| Protein | Peptide      | 100 HC, 50 T1D           |                      |      | 10 HC, 10 T1D                |             |                 | 50 T2D                 |                 |                      |                 |                      |
|---------|--------------|--------------------------|----------------------|------|------------------------------|-------------|-----------------|------------------------|-----------------|----------------------|-----------------|----------------------|
|         |              | DASP Verification Cohort |                      |      | DASP Blind Validation Cohort |             |                 | T2D Specificity Cohort |                 |                      |                 |                      |
|         |              | FC <sup>a</sup>          | P-value <sup>a</sup> | AUC  | Specificity                  | Sensitivity | FC <sup>a</sup> | P-value <sup>a</sup>   | FC <sup>b</sup> | P-value <sup>b</sup> | FC <sup>c</sup> | P-value <sup>c</sup> |
| PPBP    | EESLSDLYAELR | 1.6                      | 8.41E-08             | 0.77 | 0.3                          | 1           | 1.6             | 4.93E-02               | -1.7            | 1.71E-04             | 11.0            | 4.44E-12             |
| PPBP    | NIQSLEVIQK   | 8.5                      | 6.62E-18             | 0.93 | 1                            | 1           | 30.4            | 1.08E-05               | -1.2            | 7.44E-02             | 32.6            | 4.44E-12             |

<sup>a</sup>T1D in respect to HC.

<sup>b</sup>T1D of blind set in respect to T2D.

<sup>c</sup>T2D in respect to HC of blind set.

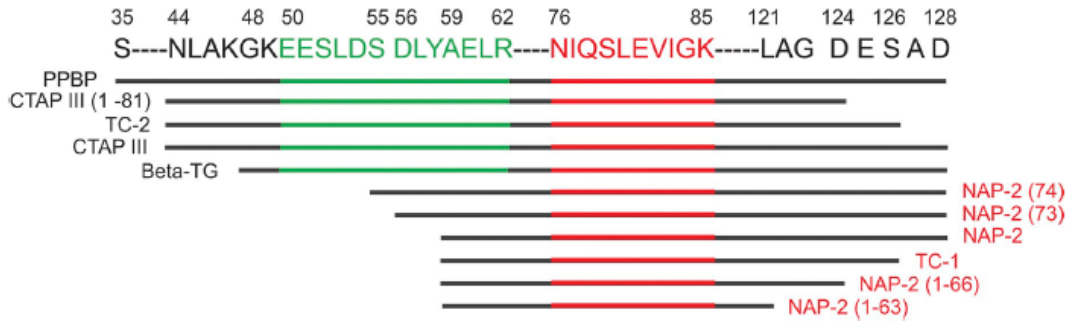

Zhang et al., J Exp Med. 2013, 210(1): 191-203

13

# TMPRSS2-ERG fusion protein products

## All possible TMPRSS2-ERG fusion protein products in prostate cancer

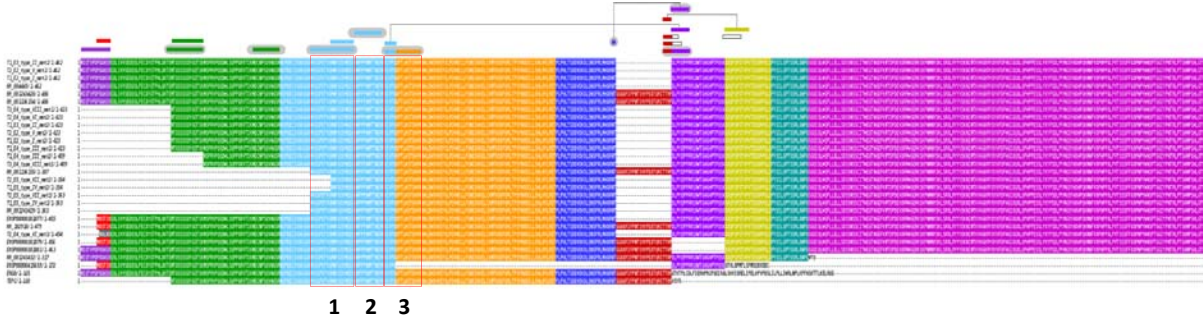

## Multiple protein products are detected in TMPRSS2-ERG fusion positive tumors

| Sequence            | amol/μg of total protein |     |     |     |     |     |     |
|---------------------|--------------------------|-----|-----|-----|-----|-----|-----|
|                     | PT1                      | PT2 | PT3 | PT4 | PT5 | PT6 | PT7 |
| TEMTASSSSDYGQTSK    |                          |     |     |     |     |     | 287 |
| MVGSPDTVGMNYGSYMEEK | 339                      | 50  |     | 80  | 382 | 117 | 546 |
| HMPPPNMTTNER        | 1210                     | 169 | 20  | 78  | 760 | 543 | 762 |
| VIVPADPTLWSTDHVR    | 48                       | NQ  |     | NQ  | 30  | 74  | 35  |
| ITTRPDLPEYPPR*      | 31                       | 10  |     |     |     |     |     |
| NTDLPYPPR*          | 26                       | 10  |     | NQ  |     |     |     |

\*mutually exclusive peptides

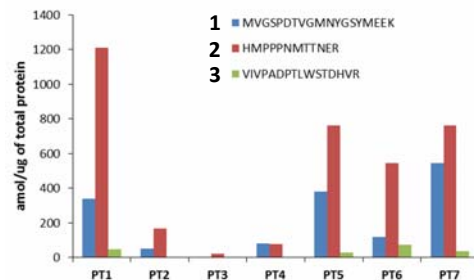

He et al., manuscript in preparation

14

## Q/A: “Qualify” the assays

- ❑ **How do you “qualify” your measurements/assays, i.e., what criteria do you use or think appropriate to say that your measurements/assays has been successfully developed?**
  - Detection of endogenous signal in intended biological matrix
  - Response curve is linear spanning  $\geq 3$  orders (reversed curve OK)
  - $CV < 20\%$
  - Endogenous level:  $> 2 \sim 5 \times$  LLOQ, to be clinically useful
  - If to be used for relative comparison, recovery evaluation can be done, but not required

15

## Q/A: Min. requirement for publication

- ❑ **What information do authors need to provide in their manuscripts/supplement to enable reviewers and readers to understand what was done and to be able to judge the confidence of the measurements made?**
  - PRISM separation conditions: column dimensions, packing material, gradient, loading, fraction collection, concatenation
  - LC-SRM conditions in details: column dimensions, packing material, gradient, loading, MS conditions
  - Extracted ion chromatograms (XICs) for both light and heavy signals at claimed detection level (for at least three transitions; if not available at this level, show simultaneous detection of  $> 3$  transitions at a higher concentration level)
  - S/N ratios for each transition measured
  - CV for each transition measured
  - Response curve for each transition used for quantification

16

## Acknowledgement

- Tujin Shi
  - Weijun Qian
  - Jintang He
  - Chaochao Wu
  - Qibin Zhang
  - Thomas Fillmore
  - Yuqian Gao
  - Athena Schepmoes
  - Mahmud Hossain
  - Joe Brown
  - Karin Rodland
  - David Camp
  - Dick Smith
- NCI CPTAC
  - NCI EDNRN
  - NIGMS P41 BTRC (NCRR)
  - NIH Director's New Innovator Award



# Targeted Peptide Measurement in Biology and Medicine

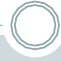

**Brad Ackermann, Ph.D.**

**Biological Mass Spectrometry  
Laboratory for Experimental Medicine  
Eli Lilly and Company  
19-June-2013**

## Background

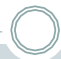

- Group charged with performing biological protein MS for Lilly Research Labs
- Applications
  - Biomarker discovery
  - Target validation/characterization
  - Biomarker verification/clinical translation
  - Reagent characterization and other forms of protein analysis
- Instrumentation: Orbitraps, triple quads, MALDI-ToF
- Customers: Program Teams (discovery, pre-clinical, clinical)
- Therapeutic areas: Onco, AI, MSK, NS, Endo
- Goal: use targeted MS for rapid, selective protein analysis
  - Improve biochemical understanding of drug targets and disease
  - Verify and translate protein biomarkers (PD, tailoring, disease)

## Protein-MS Work Distribution

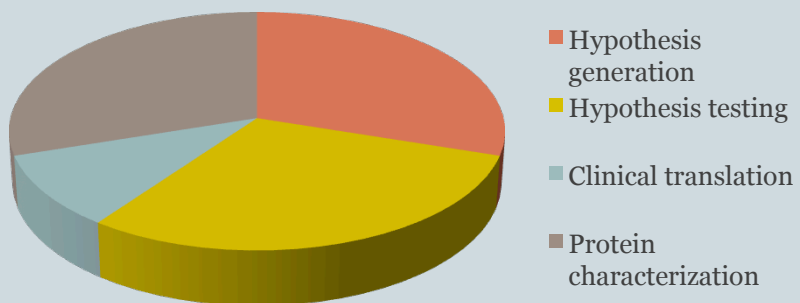

## Protein Biomarker Workflow

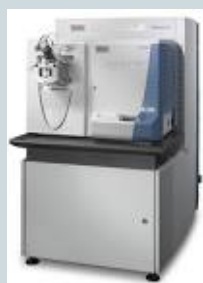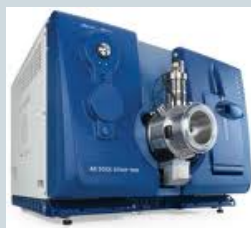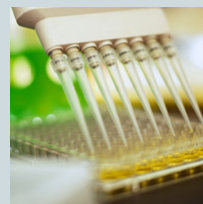

Discovery → Qualification → Verification → Validation

Tier I

Tier II

Tier III

## Q1: Level of Multiplexed Analysis

*What range of analyte plex-level per-injection do you typically use in your experiments? What is the impact of the plex-level used on the robustness and figures of merit (CV, LOD, LOQ) of the developed MRM/SRM assays?*

## Level of Multiplexed Analysis

- We typically do not use LC/MS/MS for *de novo* hypothesis generation; rather, we use it to understand biology surrounding a target that is of interest to our portfolio.
- Most assays have fewer than 10 analytes; targeted assays MRM are developed using the fewest analytes possible to interrogate target biology.
- The influence of plex multiple on assay robustness/performance has not been investigated.
- Formal acceptance criteria are not applied in early stages.
- LLOQ is based on precision and accuracy (if protein std available). LOD is considered to be 3x std dev of blank.

## Q2: Confidence in Protein Assignment

*Explain how you establish confidence that what is being measured is the analyte of interest (e.g., match to spectra of an internal standards, match to reference spectra from discovery experiments, RT, etc.). How do these methods differ from "Discovery Proteomics" using data-dependent or data-independent experiments?*

## Confidence in Protein Assignment

### Targeted MRM

- MRM methods are not prepared without peptide standards.
- We synthesize standards for all surrogate peptides of interest and use full scan MS/MS, RT, and exact  $m/z$  (if available) to confirm assignments.
- Blast searches are performed to verify the uniqueness of all surrogate peptides used.

### Non-Targeted Label-Free Analysis

- *De novo* hypothesis generation work done using label-free methods on an Orbitrap; MS1 used for quantification with data-dependent MS/MS for peptide identification.
- Workflow for discovery proteomics using label-free methodology has been published.<sup>1,2</sup> Measures taken to confirm protein assignments are discussed.

1. Higgs RE, et al., *J. Proteom. Res.* 4, 1442-50 (2005)

2. Higgs RE et al., *Int. J. Proteom.* 674282, 1-10 (2013)

## Q3: Method of Quantification

*Explain your method of quantification, how many transitions you monitor and which ones are chosen to quantify. If you are using internal standards describe in detail how they are used. If you are not using internal standards, explain how you are quantifying. Discuss the capabilities and limitations of your approach.*

## Method of Quantification

- Labeled protein IS rarely used (availability/purity).
- SIL-IS prepared for all surrogate peptides, typically with 2-3 flanking residues.
- One to three transitions monitored depending on matrix complexity and method for clean-up.
- Extra transitions often used for confirmation only.
- *Relative* assay<sup>1</sup> – peptide std curves
- *Definitive* assay<sup>1</sup> – protein std curves
- Protein standards are well characterized.
- Peptide stds are qualified by AAA for peptide content (on fit-for-purpose basis).
- For *definitive* assays, spike-recovery and std addition are used to qualify a surrogate matrix.

1. Lee JW, et al. *Pharm. Res.* **23**, 312-328 (2006).

## Q4: Standard Curves

*If you generate standard curves (calibration or response curve), explain how you use them to assess the quantitative accuracy of the assay (e.g., are the slope and y-intercept from the curve regression used in calculating the analyte concentration in a sample? Is an external calibration curve used?).*

## Standard Curves

- External calibration using either peptide or protein standards are analyzed using peptide SIL internal standards.
- Standard curves are prepared in surrogate matrix  $\geq 5$  pts.
- Various fitting methods applied (1/x, 1/x<sup>2</sup>, 4PL).
- Authentic samples used whenever possible to define the working range of the assay.
- Duplicate std curves which bracket samples used to verify assay performance. Back-calculated values for individual stds gives crude estimate of accuracy.
- As assays progress, it's important to understand the validity of the surrogate matrix used (i.e. demonstrate parallelism).
- Parallelism between surrogate and authentic matrix can be assessed for both *relative* and *definitive* assays.

## Q5: Protein Estimation

Can you provide a useful estimate or accurately determine the amount of protein in the matrix based on the measured levels of peptides? Explain how/why. Indicate experimental parameters such as number of peptides per protein and the criteria/computational tools applied. If you have multiple peptides from the same protein and each gives a different answer for the extrapolated protein level, how do you deal with this?

## Protein Estimation

- Linear statistical models used to roll up transitions to peptides and peptides to proteins.<sup>1,2</sup>
  - Peptide area = Peptide Constant \* [Protein]  $\rightarrow \log(\text{AUC}_{ij}) = \text{Peptide}_j + \text{Sample}_i + e_{ij}$
- Dilution can be used to identify peptides or transitions.

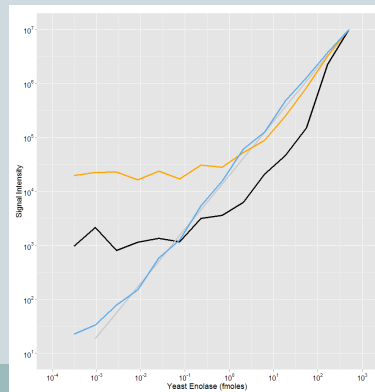

Dilution of yeast enolase in UPS1 background  
 Black = average of all peptides  
 Orange = model estimate  
 Blue = dilution optimal model

1. Higgs RE et al., *Int. J. Proteom.* 674282, 1-10 (2013)
2. Chang C-Y, et al., *Mol. Cell. Proteomics* 11, 1-12 (2012)

## Q6: Interferences

*Describe methods you use to establish presence of interferences and how you deal with them if detected.*

## Interferences

- Appropriate blank samples are included with all sample analysis runs.
- SRM ratios in biological matrix are compared to synthetic peptide standard.
- Linear dilution of signal in surrogate matrix or buffer also used.
- High reliance on anti-protein IP
  - Improved enrichment with reduced interference
  - Conventional sample prep (SPE, IEX) only used on as needed basis
- Interferences addressed by:
  - Changes in sample prep
  - Choose alternate transition or peptide
  - Change LC column or gradient
  - Use high resolution SIM instead of MRM (Q-Exactive)
- Important: watch out for endogenous ligand interference when using high affinity antibodies.



## Q7: Ionization Suppression

*How do you account for suppression of ionization in your quantification method?*

## Ionization Suppression

- Not a major issue owing to high reliance on SIL internal standards.
- Anti-peptide IP employed where ever possible over conventional methods (faster method development and reduced ion suppression).
- We do not specifically quantify ion suppression; it is therefore rolled up into our estimation of spike-recovery.
- Single biggest concern comes from detergents needed for protein handling and IP. We usually modify the sample preparation method to address this issue (change detergent, increase washing steps, etc.).

## Q8: Assay Qualification

*How do you “qualify” your measurements/assays, i.e., what criteria do you use or think appropriate to say that your measurements/assays has been successfully developed?*

## Assay Qualification

- Depends on the use of the assay (Fit-for-Purpose).
- Both *pre-study* and *in-study* validation considered.
- *Pre-study*: Total Error of 30% is considered the default for acceptance
  - Not applied to early work
  - Accuracy measured by spike-recovery using a protein std (*definitive*)
  - Accuracy can be estimated from peptide std or QCs (*relative*)
- *In-study*: bracketed std curves used to assess run acceptance.
- For later stage work, qualification of the surrogate matrix is performed:
  1. Std addition – does the surrogate and authentic matrix give similar slopes?
  2. Dilutional linearity – does the signal for an authentic biological sample decrease linearly when diluted in surrogate matrix?
  3. Spiked recovery – is recovery within  $\pm 20\%$  of theoretical?
- Important to address source of determinant error (e.g. stability or PAE).

## Q9: Software Tools

What software and analytical tools do you use in your studies and why?

## Software Tools

- In-house proteomics pipeline
  - Utilizes OMSSA, X! Tandem, Protein Pilot, and Peaks de-novo for peptide ID
  - High resolution label free MS1 quantification
  - MALDI-quant (Gutierrez *et al.* 2005)
- JMP, SAS, R for statistical analyses, Multiquant and Pinpoint for MRMs

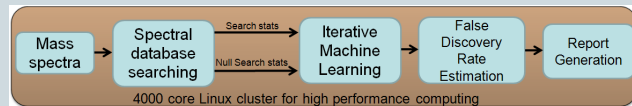

Interactive web-based report to review results with links to external databases:

Amlyloid like protein 1 precursor\_6 distinct seq (0.00% specific), 8 peptide ions, min\_qval=0.00000 [2 of 23]

0100000101234567891011121314151617181920212223

0100000101234567891011121314151617181920212223

| Scan  | RT    | Δ RT   | Δ CACN | M    | Theo M1 | Δ M1 | Δ M2 | Thro M3 | Mod  | Δ CQ  | peptide | score | qval |      |           |        |
|-------|-------|--------|--------|------|---------|------|------|---------|------|-------|---------|-------|------|------|-----------|--------|
| 00440 | 12.74 | -15.44 | 0.0    | 1938 | 4327    | 1938 | 8300 | 0       | 4000 | 205.3 | 1695    | 8136  | 73   | 0.73 | FLVLSK    | 0.0000 |
| 01005 | 28.44 | 0.00   | 0.0    | 1263 | 4467    | 1263 | 6277 | 0       | 1820 | 144.0 | 1247    | 6328  | 19   | 0.94 | FEGLAR    | 0.0000 |
| 00096 | 18.44 | -7.00  | 0.0    | 1037 | 3736    | 1037 | 6000 | 0       | 3100 | 223.4 | 1371    | 6820  | 10   | 0.98 | LVGALDQ   | 0.0000 |
| 00819 | 22.51 | -4.81  | 0.0    | 1371 | 4467    | 1371 | 6800 | 0       | 2400 | 178.0 | 1371    | 6800  | 0    | 0.94 | LVGALDQ   | 0.0000 |
| 01107 | 28.90 | -0.94  | 0.0    | 1247 | 3876    | 1247 | 6300 | 0       | 2300 | 184.3 | 1247    | 6300  | 0    | 0.88 | SLVFEGLAR | 0.0000 |
| 00540 | 15.98 | -10.00 | 0.0    | 938  | 2377    | 938  | 4600 | 0       | 1600 | 184.4 | 81      | 3765  | 07   | 0.85 | LVGALDQ   | 0.0000 |
| 00973 | 18.43 | -4.32  | 0.0    | 1240 | 3579    | 1240 | 6000 | 0       | 2800 | 233.8 | 1240    | 6000  | 0    | 0.89 | LVGALDQ   | 0.0000 |
| 00327 | 8.67  | 0.00   | 0.0    | 825  | 3978    | 825  | 4977 | 0       | 1000 | 108.0 | 928     | 4977  | 0    | 0.79 | LVGTHAR   | 0.0000 |

Post-translational modifications shown with green background  
Amino acid mutations shown with red background

Result cancer:  
 Cervical cancer  
 Colorectal cancer  
 Endometrial cancer  
 Head & neck cancer

## Q10: Author recommendations

*What information do authors need to provide in their manuscripts/ supplement to enable reviewers and readers to understand what was done and to be able to judge the confidence of the measurements made?*

## Author recommendations

- Sufficient detail needed to allow replication of work.
- More extensive supplemental sections recommended.
- Authors should include discussion on how/why they selected the level of validation used (explain fit-for-purpose rationale).
- Surrogate matrix qualification should be documented.
- Consistent nomenclature should be adopted for key terms regarding validation or quality assessment.
- Validation data should be included in publication of measurements.

## Author recommendations

- *Nature* **496**, 398 (2013) – *Editorial announcement*

To ease the interpretation and improve the reliability of published results we will more systematically ensure that key methodological details are reported, and we will give more space to methods sections. We will examine statistics more closely and encourage authors to be transparent, for example by including their raw data. Central to this initiative is a checklist intended to prompt authors to disclose technical and statistical information in their submissions, and to encourage referees to consider aspects important *for research reproducibility* ([go.nature.com/oloeip](http://go.nature.com/oloeip)).

## Biomarker Verification Recommendations for Tier 2

- Tier 2 assays do not need to be in full control; however, the major contributions to assay variation should be identified during development and addressed as an assay progresses.
- Total error of 30% is recommended for assay acceptance.
- Methods can be either *relative* or *definitive* based on the standards used.
- Assay precision should be measured for all methods and can be used for LLOQ assignment.
- Accuracy (bias) is measured in *definitive* methods by spike-recovery and requires a characterized protein standard.
- Spiked recovery using interleaving validation dilutions can be used to estimate bias without a protein std (*relative* methods).
- Parallelism should be demonstrated between the surrogate matrix used to prepare standards (and QCs) and the authentic biological matrix.
- Total error profile should be considered when selecting method for curve fitting.

## **Biomarker Verification**

### ***Recommendations for Tier 2 - continued***

- SIL peptide internal standards should be made for each analyte.
- IS with flanking residues recommended, but not required.
- Std curves must have a minimum of 5 pts.
- In-study validation:
  - Duplicate std curves (bracketed) recommended
  - QC samples optional
- Selectivity blanks should be included in each run.
- More than one transition per analyte depending on sample prep and matrix.
- Fit-for-Purpose experiments to address pre-analytical effects need to be considered to avoid large sources of determinant error.



## Protein Target and Biomarker Quantitation in Translational Research of Biologics

*Targeted Peptide Measurements in Biology and Medicine:  
Best Practices for Assay Development Using a “Fit-for-Purpose” Approach*

Dr Hendrik Neubert  
Associate Research Fellow  
Head of Biomarkers & Mass Spectrometry  
PDMNBE, Pfizer Inc, Andover MA  
Bethesda – 18/19 June 2013

 **WORLDWIDE RESEARCH & DEVELOPMENT**  
Pharmacokinetics, Dynamics & Metabolism – NBE

## Goals of Targeted MS Assays

**WHAT:**

- Quantify proteins targeted by therapeutics (preclinically 20% / clinically 80%)
  - Basal levels in normal and disease; all fluids and tissues
    - Parameter determination for mechanistic PK/PD models supporting target evaluation and FIH dose projections (translational pharmacology)
    - Precision medicine/patient stratification
  - Longitudinal assessment of target engagement (free, complex, total), in preclinical, FIH and POC studies
    - How hard did the drug hit the target to test the mechanism?
- Longitudinal assessment of mechanistic PD protein biomarkers (proximal to target/site of action)
  - Did we test the proposed mechanism of action?

**CUSTOMERS:**

- PK/PD and Clinical Pharmacology modelers
- Precision Medicine/Clinical Scientists

 **WORLDWIDE RESEARCH & DEVELOPMENT**  
Pharmacokinetics, Dynamics & Metabolism – NBE

2

## Mechanistic 'Site-Of-Action' PK/PD Model

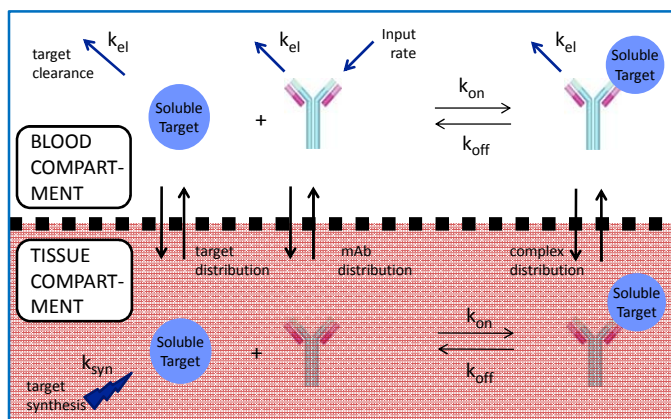

## Immunoaffinity (IA)-LC-MS/MS Assays *configurations for protein quantification*

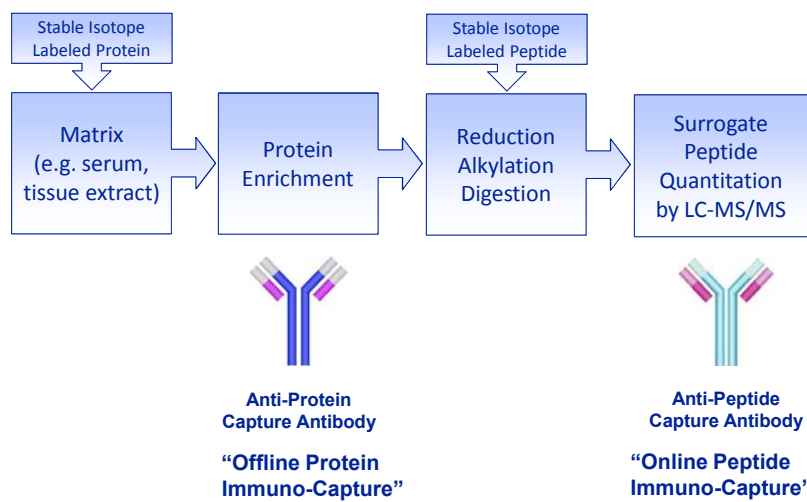



## Mechanics of Immunoaffinity Workflows

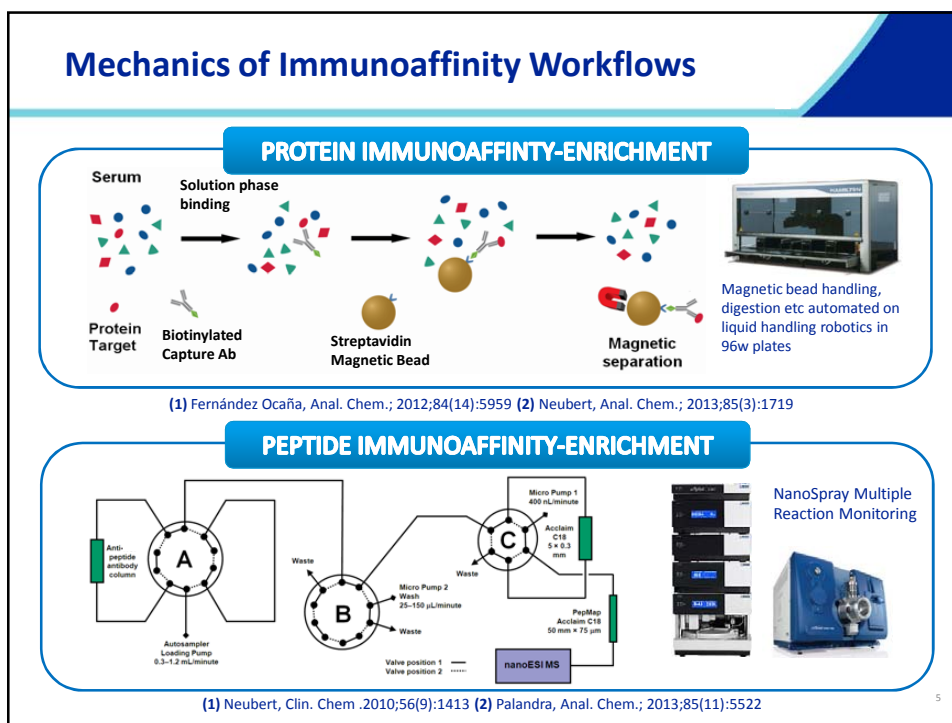

## Confidence in what's being measured

### Assay development

- Protein and/or peptide immunoaffinity enrichment increases selectivity
- SIL peptide (coelution with native peptide; matching MRM transition ratios)
- MRM triggered MS/MS (if enough signal); match spectra
- Increase MS signal of native peptide by spiking...
  - Recombinant protein prior to digestion
  - Digest of recombinant protein (or cell lysate, tissue digest containing protein of interest)
  - Light synthetic peptides
- When possible: induce increase in protein in biological sample (cell line, primary cells, whole blood, etc) using external stimulus

### Assay validation/implementation

- Assess assay selectivity as part of qualification/validation by analyzing protein in normal/disease populations:
  - Evaluate potential for variable matrix-related interferences in independent sources of matrix
  - Recovery of spiked recombinant/endogenous pool into individual samples
    - E.g. Unspiked and spiked matrix (n>6) are analyzed in replicates and results are considered acceptable if 80% of samples are within +/- 25% % of the target value.

## Method of Quantification

- Standard curve with recombinant protein in analyte-free surrogate matrix
- SIL peptides (typically use extended sequence containing trypsin cleavage sites) added to all samples, standards and QCs
- Monitor 2-3 transitions per analyte
  - usually use single transition (most intense) for calculating signal-area-ratio (native/SIL)
  - occasionally summing transitions if S/N advantage achieved
- Back-calculate samples against standard curve

**Advantage:** recombinant protein curve is proven approach in many assay formats including immunoassays; akin to small molecule LCMS; SIL peptide provides additional normalization for part of the workflow

**Disadvantage:** recombinant  $\neq$  endogenous protein

## Standard Curves

- Standard curve with recombinant protein in analyte-free surrogate matrix (buffer, depleted matrix from same species, same matrix from different species)
  - Demonstrate parallelism (dilution linearity of incurred sample)!!
  - Duplicate standards and blanks: one set of standards run before samples, one after
- Linear or non-linear curve fit
  - Non-linear fit common for many IA approaches
  - Depending of affinity of capture Ab
- Assess goodness of curve fit by back-calculating standards against curve
  - For assay validation/implementation -- if needed remove outliers using predefined criteria and document analytical reason; e.g. +/- 25%; x number of stds included in final curve; 75% of total numbers of stds included)
- Don't extrapolate above highest or below lowest standard (unless during exploratory method development)

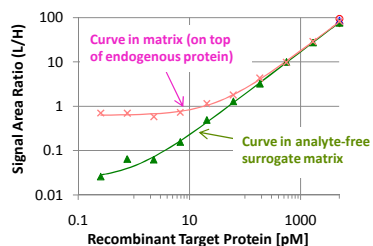

## Multiplexing vs Single Measurement

- Typically 1 protein analyzed (sometimes 2, rarely 3 or more)
- Typically 2-3 peptides per protein (sometimes 1, rarely more than 3)
  - Decide upfront what to do with the data from several peptides
    1. Use highest responding peptide
    2. Calculate average if difference no more than e.g. 20%
    3. Report different concentrations based on individual peptides for confirmed isoforms

Confirmatory peptide (good correlation between two peptides confirms validity to quantify with one peptide)

Lead peptide used for quantification

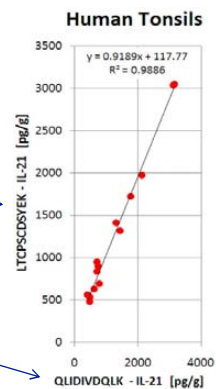

Palandra, Anal. Chem.; 2013;85(11):5522

## Interferences

- Establish during method development using pooled sample(s) and assess spike recovery
- Assess assay selectivity using protein spike recovery as part of assay qualification/validation from multiple matrix sources (different individuals; matching disease state, etc)
- Consistency of response of SIL peptide (e.g. across a 96w plate)
- Consistency of response of SIL peptide between buffer and matrix samples (ionization suppression; matrix effect?)

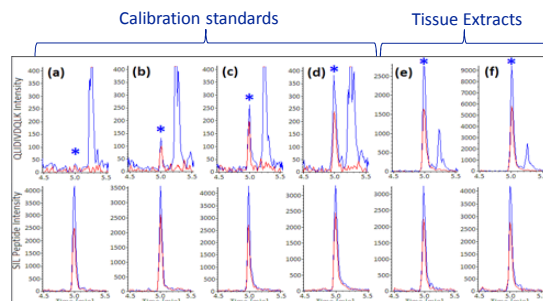

Palandra, Anal. Chem.; 2013;85(11):5522

## Assay Qualification/Validation

- Fit-for-purpose assay qualification/validation
  - Stage-gate dependent increase of analytical rigor (early disc., lead development, preclinical tox, FIH, POC ....)
- How is the data used? ... Exploratory biomarker versus defined clinical end-point?
  - Non-regulated versus regulated (GCP and GLP)
- Assay qualification/validation plan predefines acceptance criteria for each experiment
- Example of validation experiments performed for target biomarker assay for FIH study (GLP/GCP)
  - *Primary standard stock solution stability*
  - *Back-calculated calibration standards & calibration parameters*
  - *Intra-batch and inter-batch precision and accuracy (different target levels, different days, many replicates)*
  - *Matrix inter-lot accuracy precision*
  - *Effect of therapeutic on recovery*
  - *Dilution linearity/parallelism*
  - *Confirmation of LLOQ*
  - *Autosampler re-injection reproducibility*
  - *Benchtop (4C) matrix stability*
  - *Freeze/thaw matrix stability at -20C and -70C*
  - *Long term stability (1m, 3m, 6m, 1y ...)*
  - ....

## Software

- Skyline (early MRM method development)
- Mostly vendor specific quantification software such as
  - Analyst Quantitation Wizard and MultiQuant (Sciex)
  - LCQuan and PinPoint (Thermo)
- Sometimes Excel and relevant data-analysis Add-on's for better multi-parametric curve fitting of immunoaffinity LC-MS/MS data

## Publications

- Information on all topics discussed in this presentation should be provided (either for manuscript or supplement):
  - *Goal of measurement*
  - *Why the chosen assay format is most relevant (contrast to other assay formats) and suitable for the intended purpose*
  - *Rationale for selection of all standards (recombinant proteins, SIL peptide etc), capture Ab, surrogate peptides, MRM transitions.*
  - *Confidence in the measurement; highlight what makes the method specific*
  - *If single peptide is measured: why this is good enough?*
  - *If multiple peptides are measured: what to do with the data and why?*
  - *Illustrate analytical rigor and show fit-for-purpose assay qualification dependant on use of data*

# Multiplexed Quantitative Analyses Conducted in PRM Mode

Targeted Peptide Measurements in Biology and Medicine:  
*Best Practices for Assay Development  
Using a "Fit-for-Purpose" Approach*  
Bethesda, MD, June 18-19, 2013.

**Bruno Domon, PhD**  
Head Luxembourg Clinical Proteomics Center  
Invited Professor University of Luxembourg

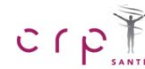

## Challenges in Quantitative Proteomics

- **Complexity of proteomic samples**
  - Reduce sample complexity (*i.e.* biochemical background)
  - High [selectivity](#) of measurements
- **Wide dynamic range of protein concentrations**
  - High [sensitivity](#) (LOD / LOQ)
  - Cover a wide dynamic range
- **Experiment at scale**
  - Biological variability; *e.g.* assess "[sensitivity](#)" and "[selectivity](#)" of markers
  - [Multiplexing](#) capability, concomitant analysis of large panels of peptides
  - [Throughput and robustness](#) of platform to measure large cohorts

Domon - 2013

...

## Requirements for a Targeted Experiment

- **Selectivity**
  - Background interferences
  - Monitor multiple transitions
  - *Confirm identity of the analyte !*  
*Full MS/MS spectrum (or surrogate)*
- **Sensitivity**
  - Low limit of detection (LOD)
  - Measure low abundance components
- **Multiplexing capability**
  - Number of peptides in one LC-MS run
  - Schedule measurements (*elution time*)

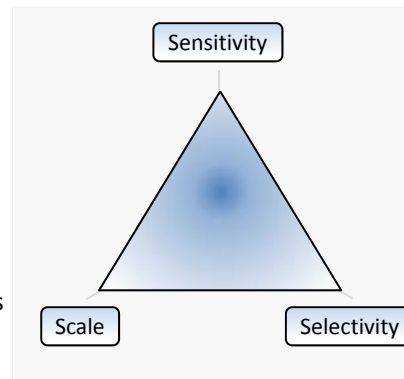

3

## Targeted Proteomic Experiments

- **Precise Quantification**
  - Determine precisely the amount of analyte  
(e.g. *biomarker verification study*)
  - **Internal standards** (calibrated amount)
  - Limited number of analytes
- **Screening Experiment**
  - **Detection** of peptides in biological sample
  - Differential analysis (*biology study / discovery*)
  - **Large-scale** (*hundred of candidates*)

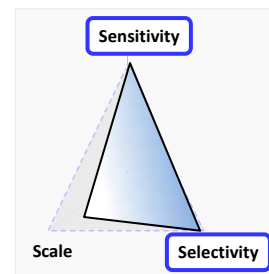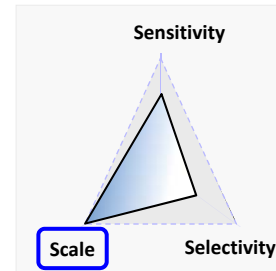

Gallien et al.; *J. Mass Spectrom.*, 2011

Domon - 2013

...

4

## Targeted Experiment: Precise Quantification

- **Precise Quantification**

- Determine precisely the amount of analyte (e.g. *biomarker verification study*)
- **Internal standards** (calibrated amount)
- Limited number of analytes

- **Requirements:**

- Calibrated **internal standards**
- Dilution curves to determine LOD and LOQ
- Replication of analyses (analytical precision, CVs)
- Confirmation of the analyte **identity** based on evidences {*Reference MS/MS spectrum; accurate mass*}
- Assess presence of **interferences**
- Rigorous QC protocols, and data review

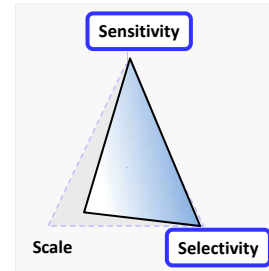

Domon - 2013

...

5

## Targeted Experiment: Screening Mode

- **Screening Experiment**

- **Detection:** presence of peptides in biological sam
- Differential analysis (*biology study / discovery*)
- **Large-scale** (*hundred of candidates*)

- **Requirements:**

- Reference peptide (/spectra) desired
- Focus on detection / concentration estimation
- Relative quantification : changes in expression level
- Selectivity desired, however false positive are acceptable {*Confirmation in a secondary screen*}
- Typically highly multiplexed experiments {*Precise scheduling of measurement required*}
- Automated data analysis {*subsequent validation of results*}

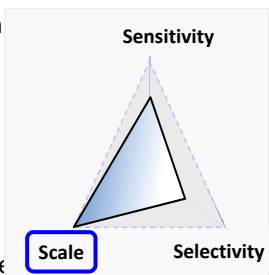

Domon - 2013

...



## Targeted Proteomic Experiment

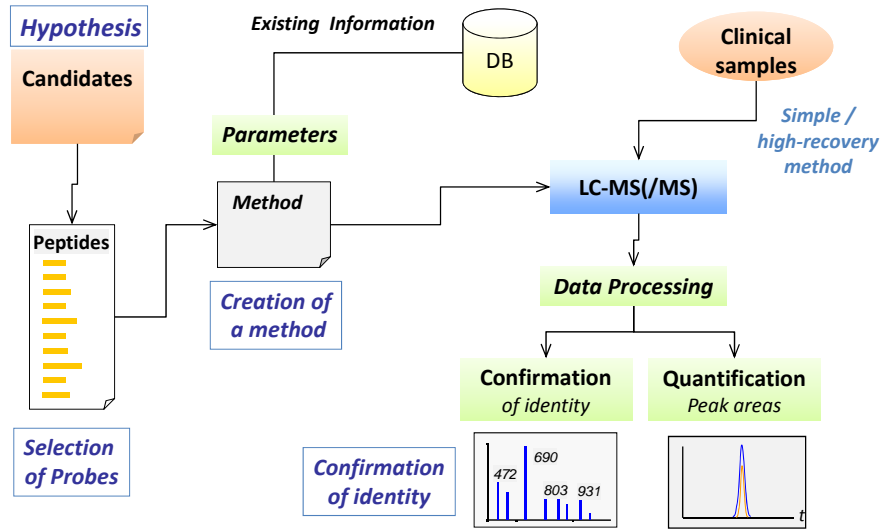

Domon - 2013

Kiyonami et al.; MCP (2011)

...

7

## Parallel Reaction Monitoring (PRM)

- Performed on a quadrupole / orbitrap instrument (high-resolution)

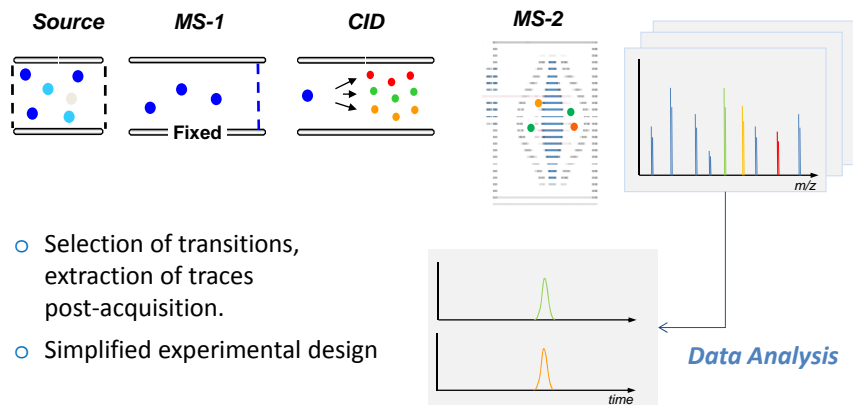

- Selection of transitions, extraction of traces post-acquisition.
- Simplified experimental design

# Design of a PRM Experiment

Quadrupole – Orbitrap  
PRM mode

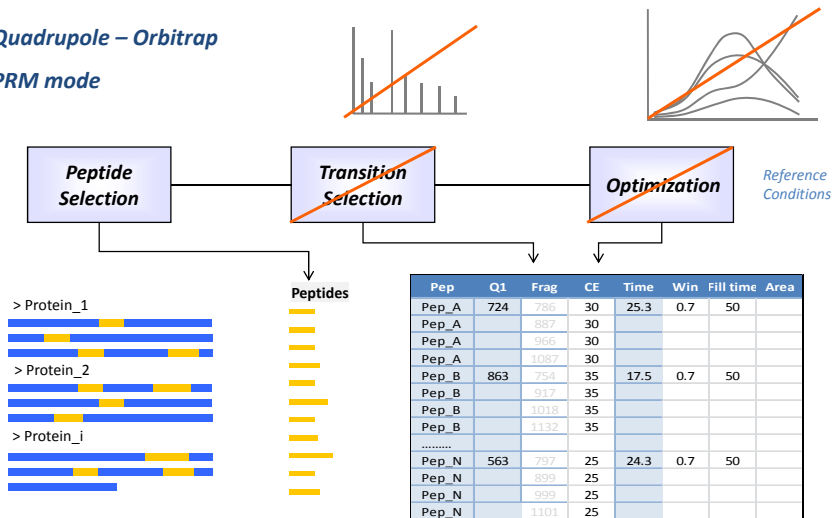

Domon - 2013

9

# Design of Targeted Proteomic Experiments

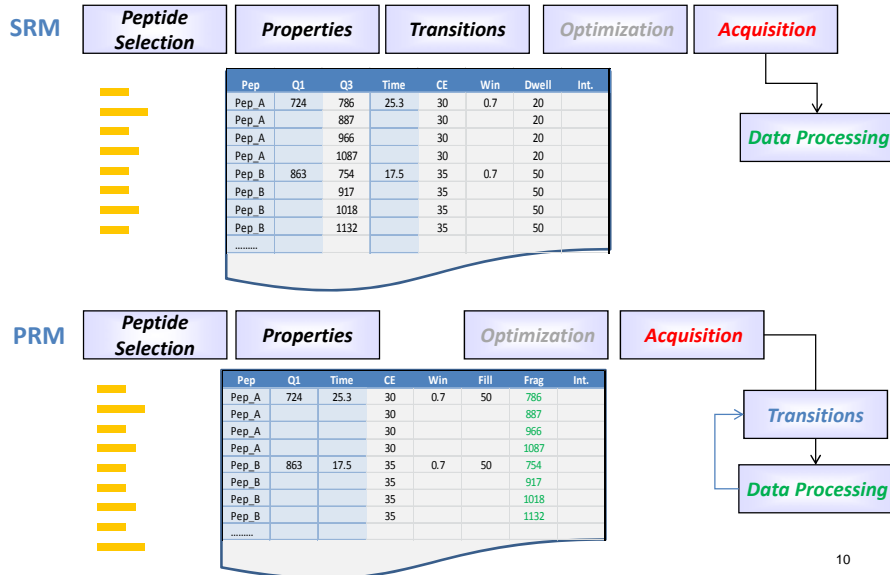

10

## Quadrupole / Orbitrap Mass Spectrometer

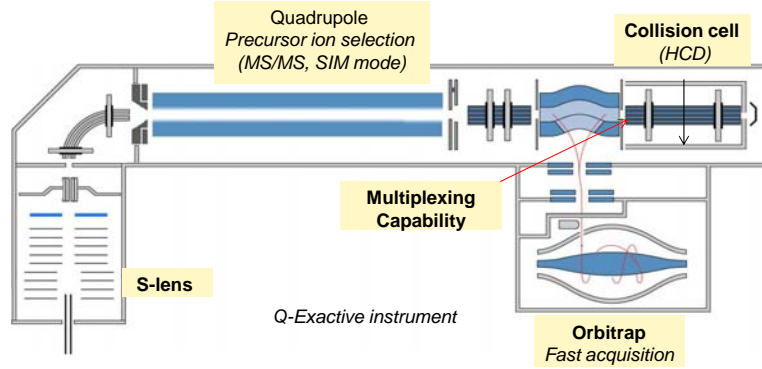

Main characteristics:

- **High resolution** (> 100,000)
- **Accurate mass** (ppm range)
- **Trapping** device

**Targeted** modes of operation:

- Method requires predefined analytes
- **SIM** mode: relies on precursor ions
- **MS/MS** (HCD) mode: relies on fragment ions

Domon - 2013

...

11 11

## Targeted Proteomics Strategies

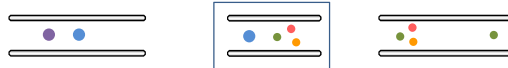

|              | Isolation               | CID                                  | Analyzer                   |
|--------------|-------------------------|--------------------------------------|----------------------------|
| <b>SRM</b>   | 1 u<br><i>(default)</i> | Quadrupole<br><i>In-beam: flux</i>   | Quad (LR)<br><i>Static</i> |
| Primary data |                         |                                      | <i>Traces [set m/z]</i>    |
| Acquisition  |                         |                                      | <b>Sequential</b>          |
| <b>PRM</b>   | 1 u<br><i>(default)</i> | Quadrupole<br><b>Trapping</b> device | HR/AM                      |
| Primary data |                         |                                      | <i>Full spectra</i>        |
| Acquisition  |                         | <b>Multiplexing</b>                  | <b>Parallel</b>            |

12

Domon - 2013

## HR/AM Targeted Proteomics

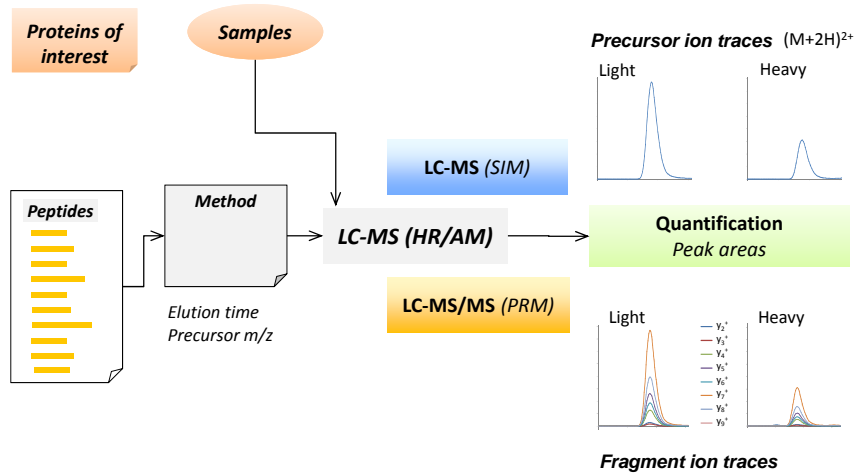

Domon - 2013

Gallien et al. *Proteomics* (2012), 11: 1709-1723

...

13

## Quantification in PRM Mode: Principle

### Targeted HCD Mode

- **Quantification based on fragment ions**
- **Acquisition method:**
  1. Selection precursor ion by quadrupole
  2. Fragmentation in the collision cell (HCD)
  3. Accumulation of fragment ions (HCD cell)
  4. Transfer of fragment ions to the orbitrap (via C-trap).

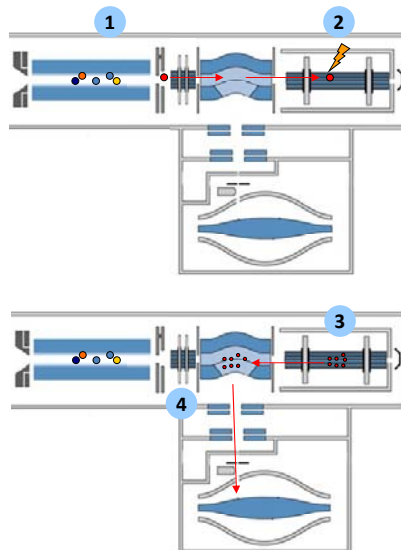

Gallien et al.; *MCP* (2012)

...

14

## PRM Mode: Multiplexed Analysis

- Sequential isolation of L/H precursors
- Fragmentation and storage in HCD cell
- One orbitrap detection scan

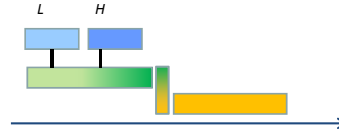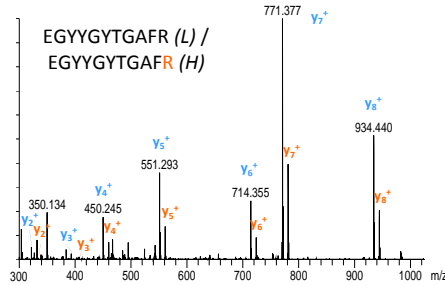

- Quantification based fragment ions
- Selection of ions post-acquisition

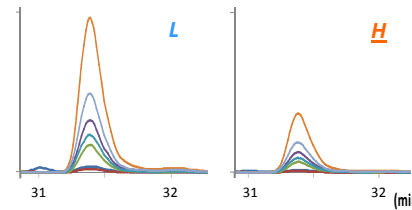

> SRM-like quantification but with high resolution fragment ions

Domon - 2013

...

15

## Performance: Ultimate Sensitivity

### ● Sample

- Two isotopologous peptides:  
**LVALVR** and **LVALVR**
- Amounts : 20 fmol : 0.01 amol  
20 fmol : **0.03 amol**  
20 fmol : 0.10 amol  
20 fmol : 0.30 amol  
20 fmol : 0.90 amol

### ● Acquisition method

- Resolution: 70,000
- Maximum injection time: 3 s
- Multiplexed SIM method

> **Sensitivity : LOD of 30 zeptomol**  
> **Intra-scan dynamic range > 4.5 logs**

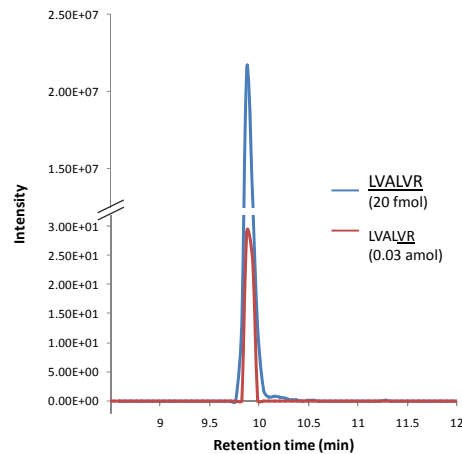

Gallien et al.; MCP (2012)

16

## Large-Scale Experiment – Critical Parameters

- **Chromatography:**
  - **Cycle time** (sampling across the elution profile: 8 – 10 data points)
- **Mass spectrometer resolving power (orbitrap)**
  - **Resolution** ~ length of the transient  
e.g. 35,000 resolution ~ 128 ms transient
  - Number of peptides = Cycle time / Transient time
- **Ion Trapping**
  - Enrichment for low abundance precursor ions
  - Max fill time < Transient length

17

## PRM Large-Scale Screening Experiment

| <i>Parameters</i>                    | <i>Multiplexed PRM analysis</i> |       |      |      |      |      |      |
|--------------------------------------|---------------------------------|-------|------|------|------|------|------|
| <b>Multiplexing:</b> Nb precursors   | 1                               | 1     | 2    | 4    | 4    | 8    | 8    |
| <i>Max injection time/pep [ms]</i>   | < 60                            | < 120 | < 30 | < 30 | < 30 | < 30 | < 15 |
| <b>Resolution</b>                    | 17 k                            | 35k   | 17 k | 35k  | 35k  | 70k  | 35k  |
| <i>Transient time [ms]</i>           | 64                              | 128   | 64   | 128  | 128  | 256  | 128  |
| <b>Cycle time [s]</b>                | 2.0                             | 2.0   | 2.0  | 2.0  | 3.0  | 3.0  | 3.0  |
| <i>Isolation window/peptide [Th]</i> | 2                               | 2     | 2    | 2    | 2    | 2    | 1    |
| <i>'Total' isolation window [Th]</i> | 2                               | 2     | 4    | 8    | 8    | 16   | 8    |
| <b>Number peptides / cycle</b>       | 32                              | 16    | 64   | 64   | 92   | 92   | 184  |

Domon - 2013

...

18

## Multiplexed PRM Analysis (4-plex)

### Method:

- Sequential isolation  
4 precursor ions
- Fragmentation /storage in  
HCD cell
- One detection scan  
(orbitrap); Parallel detection  
of fragment ions.

### Targeted Data Analysis:

- > **Verify identity**
- > **Quantify**

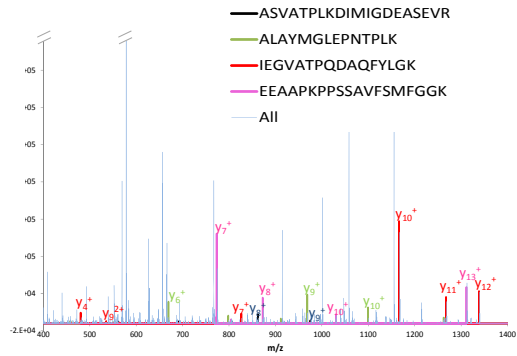

### Results:

- > **605** peptides (~80%) verified by **MS/MS spectra** ( $p\text{-value} \leq 0.1$ )
- > Consistent **quantification** results ( $CV < 10\%$  for 95 % of peptides)

## Example: Peptide *TTTPNAQATR*

### MS (Isolation window: 2 Th)

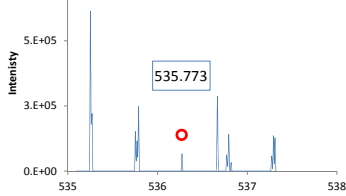

### PRM

Legend: — All fragments (blue), — Fragment ions peptide TTPNAQATR (red)

### MS/MS

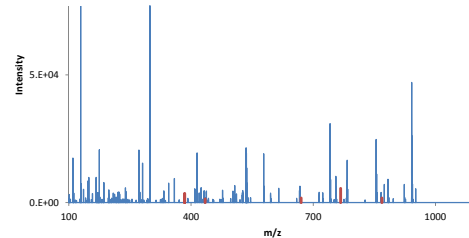

### Spectral Matching

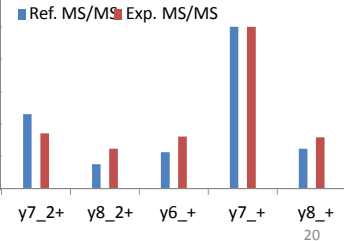

Domon - 2013

## Example: Peptide *TTTPNAQATR*

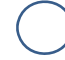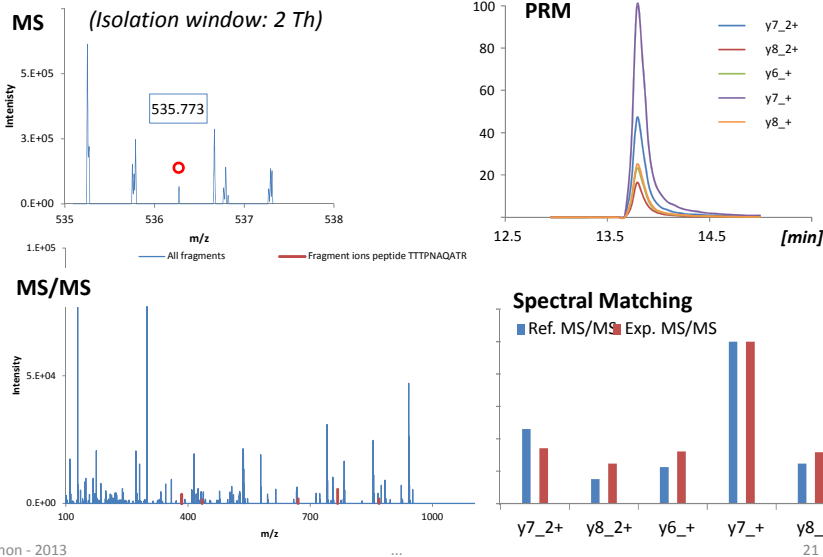

## Multiplexed PRM Analysis (4-plex)

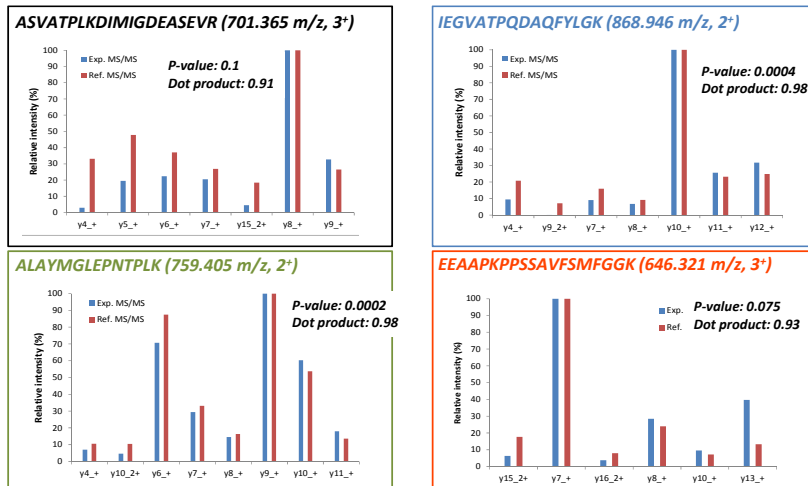

> Confirmation of the identity of the targeted peptides by spectral matching

22



## Multiplexed PRM Analysis (4-plex)

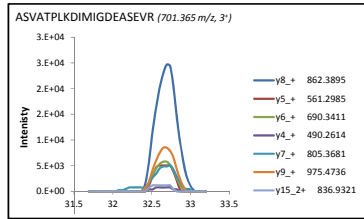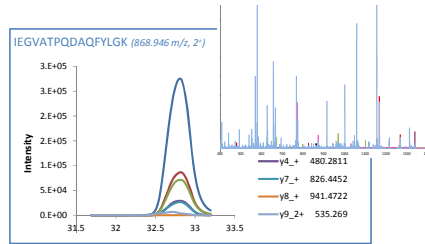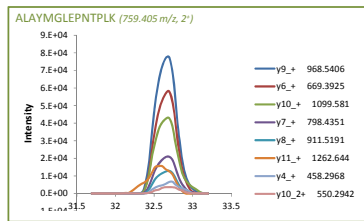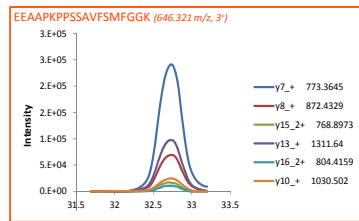

> Extraction of the ion chromatograms of the 6-8 most intense ions for each peptide

Gallien et al.; MCP (2012)

## Comparison of SRM and PRM Performances

- 35 IS spiked in urine sample
- Triplicated analysis
- 175 transitions were evaluated

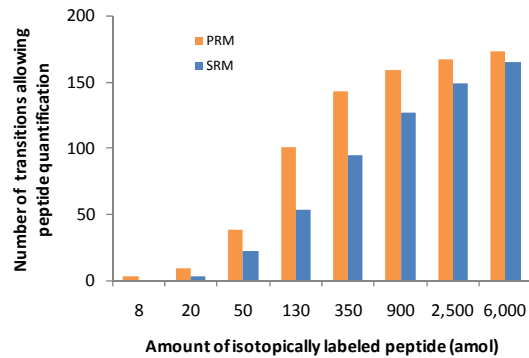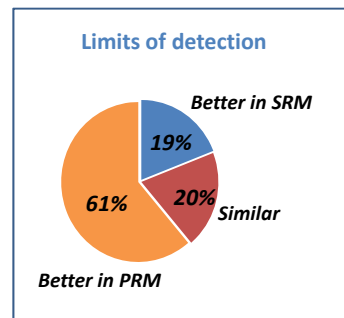

> High resolution of PRM analysis often provides more selectivity  
 > Extension of linearity range (not systematic)

24

## Selectivity Issue .....

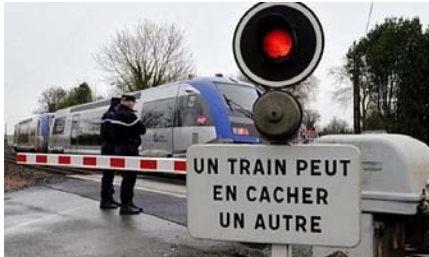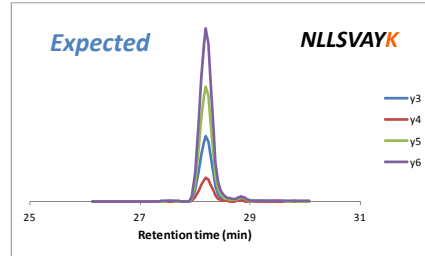

**Reality:**

Domon - 2013

...

25

## Selectivity Issue .....

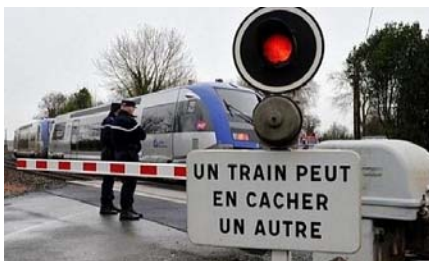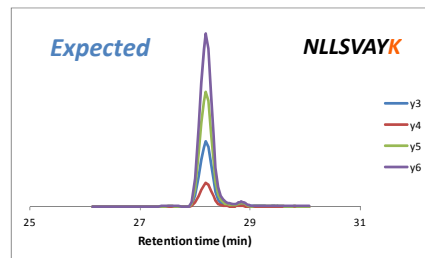

**Reality: what one gets !!**

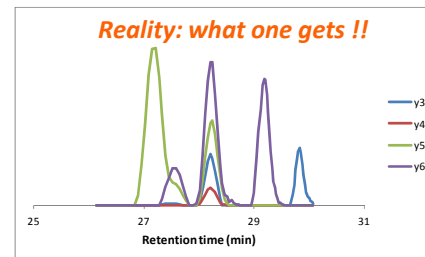

Domon - 2013

...

26

Kim et al.; Proteomics – Clinical Applications (2012)

## Selectivity of PRM Analyses

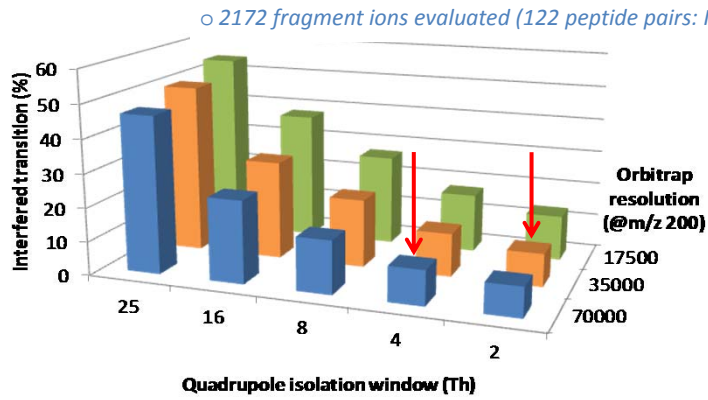

> The selectivity of measurements is dramatically affected by the isolation window  
 > Limited benefit of increasing the nominal orbitrap resolution (17.5 k to 70k)

Domon - 2013

Gallien et al.; J. Proteomics (2012)

## Selectivity in HR/AM Mode /1

SRM on Triple quadrupole

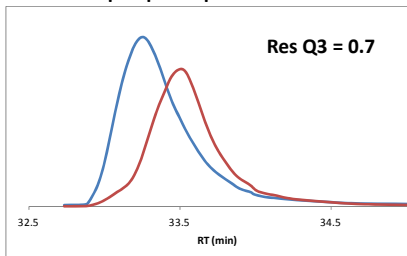

PRM on Q-Orbitrap

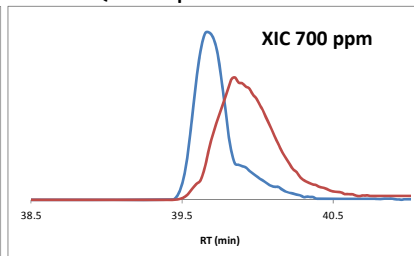

SDLAVPESELALLKYK  
 spiked in urine samples

Transitions : — 682.40->878.54  
 — 682.40->977.61

Gallien et al.; J. Proteomics (2012)

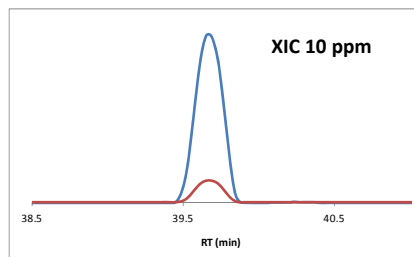

## Interferences

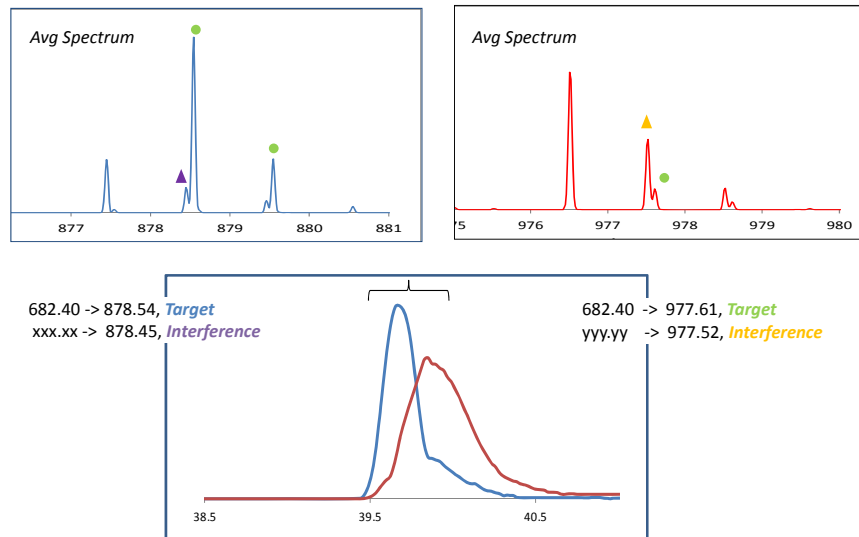

## Requirements for Quantitative Analyses

- **Determination of LOD and LOQ**
  - In the matrix of interest (*multiple samples*)
- **Assessments of level of interferences**
  - Specify complexity of sample (ratio sample/analyte)
  - Window width of precursor mass selection
  - Resolving power of the second mass analyzer
- **Evidences to confirm the identity of the analyte**
  - Number of transitions measured
  - Accurate mass of the precursor and/or fragment ions
  - Fragmentation pattern (ion ratios or MS/MS fingerprint)
- **Proposed Quantification Scheme:**
  1. Confirm identity
  2. Assess signal-to-noise ratio to ensure signal > LOQ
  3. **Quantify** only, and only if 1 and 2 are fulfilled.

## Conclusions

- **Quantification in complex biological samples is challenging**
  - It requires high selectivity and sensitivity
- **HR/AM targeted methods as alternatives to *conventional* SRM**
  - Selected ion monitoring (SIM) mode, for precursor ions
  - Parallel reaction monitoring (PRM), for fragment ions
- **Figures of merit**
  - High sensitivity and selectivity (increased analytical precision)
  - Increased confidence in assignment (accurate mass)
  - Faster /simpler method development than SRM
  - Multiplexing capabilities enabling large-scale experiments
  - The data analysis is straightforward (quantification algorithms)
- **Hotspot**
  - Sample preparation is critical to control the background (LOD)

## Acknowledgements

- Sebastien Gallien, LCP
  - Adele Bourmaud, LCP
  - Yeoun Jin Kim , LCP
  - Nina Khristenko, LCP
  - Jan van Oostrum, LCP
  - Stephane Trevisiol, LCP
  - Elodie Duriez , LCP
  - Panchali Goswami, LCP
  - Sang-Yoon Kim, LCP
  - Kevin Demeure, LCP
  - Guy Berchem, CHL - PPM
  - Markus Kellmann, Thermo
  - Thomas Moehring, Thermo
  - Andreas Huhmer, Thermo
  - Catharina Crone, Thermo
- **Funding:**
    - Fonds National de la Recherche, (FNR) G.-D. Luxembourg
    - Ministry of Research and Higher Education (MESR), G.-D. Luxembourg
    - ThermoFisher Scientific (Bremen and San Jose)

# Targeted Peptide Measurements in Biology and Medicine: Best Practices for Assay Development

Applying SRM for the quantification of proteins in basic biological/clinical research

Ruth Hüttenhain, PhD

Aebersold lab

NIH workshop, June 17-18, Bethesda, MD

## GOALS OF THE TARGETED MS EXPERIMENTS

Quantification of a defined set of proteins (~ 20 - 100) in complex samples across different biological/clinical conditions

### **Requirements for protein quantification in basic research:**

- Sensitivity
- Consistency
- Multiplexed quantification of 20 – 100 proteins
- Relative quantification
- Accuracy & reproducibility

### **But...**

⇒ Requirements for basic applications are less stringent than for clinical assays (current state-of-the art is western blot)

## SRM MEASUREMENTS FOR BASIC RESEARCH APPLICATIONS

- Step 1:** Generation of SRM assays for target proteins
- Step 2:** Testing the detectability of proteins in the target sample
- Step 3:** Preparing the final quantification method
- Step 4:** Data analysis of large-scale SRM datasets

### Example applications:

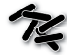

Response of *M. tuberculosis* to hypoxia in a time-course experiment

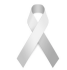

Quantification of cancer-associated proteins in a case-control study

Schubert *et al.* The Mtb Proteome Library: A Resource of Assays to Quantify the Complete Proteome of Mycobacterium tuberculosis. *Cell Host Microbe* (2013)  
 Hüttenhain *et al.* Reproducible Quantification of Cancer-Associated Proteins in Body Fluids Using Targeted Proteomics. *Sci Transl Med* (2012)

3

## STEP 1: SRM ASSAY GENERATION I

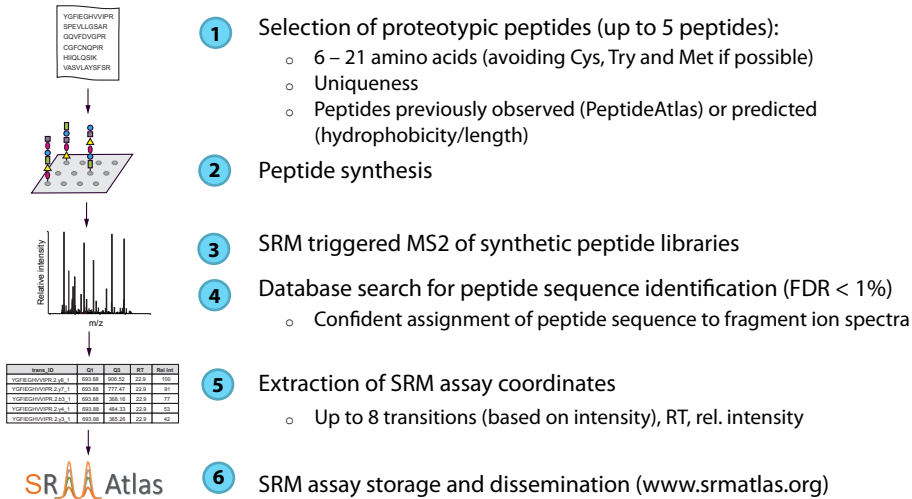

Picotti *et al.* High-throughput generation of selected reaction-monitoring assays for proteins and proteomes. *Nat Methods* (2010)

4

## STEP 1: SRM ASSAY GENERATION II

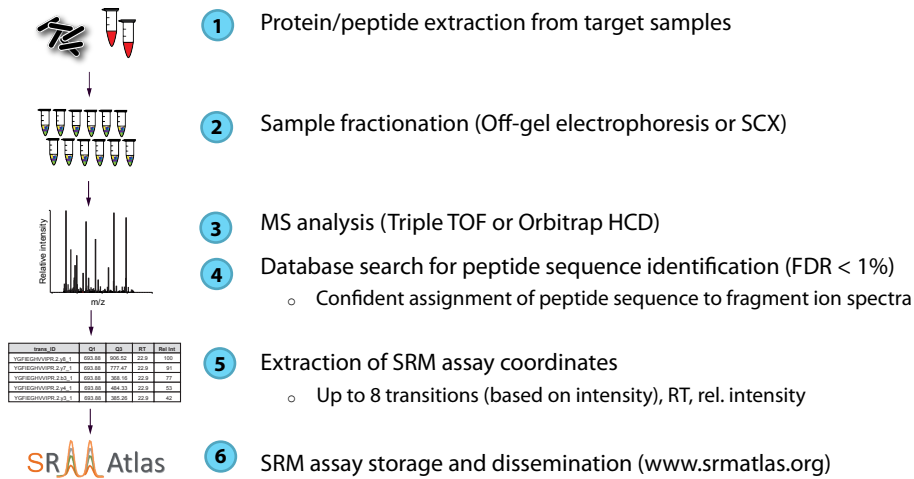

Schubert *et al.* The Mtb Proteome Library: A Resource of Assays to Quantify the Complete Proteome of Mycobacterium tuberculosis. *Cell Host Microbe* (2013)  
 Picotti *et al.* A complete mass-spectrometric map of the yeast proteome applied to quantitative trait analysis. *Nature* (2013)

4

## STEP 1: SRM ASSAY LIBRARIES IN SRMATLAS

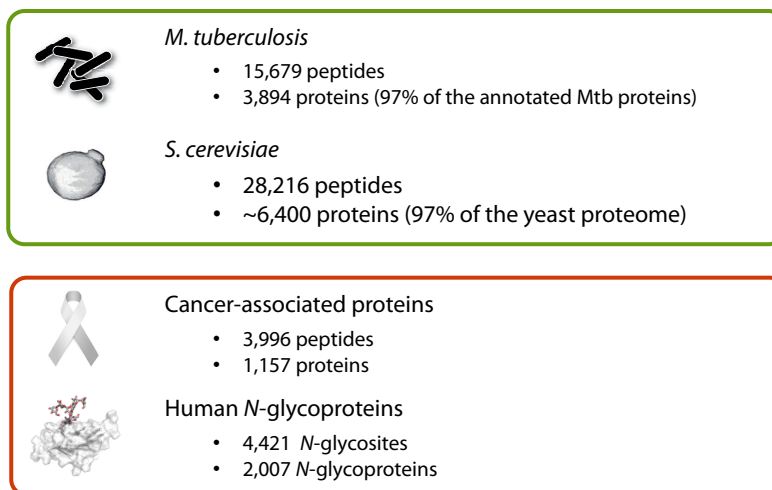

⇒ **Libraries comprising SRM assay coordinates extracted from crude synthetic peptide measurements** (without validation in complex sample background)

5



## STEP 2: DETECTABILITY TEST OF SRM ASSAYS IN TARGET SAMPLE

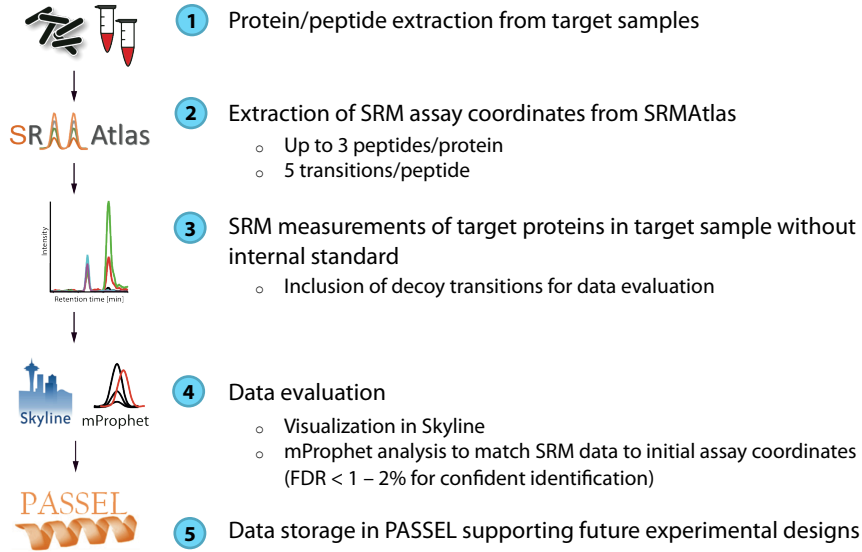

6

## STEP 2: DETECTABLE CONCENTRATION RANGE

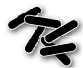

### M. tuberculosis

Detection of 2,884 proteins across 4 orders of magnitude in unfractionated Mtb digest

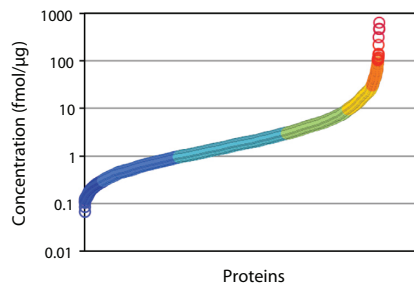

Absolute label-free abundance estimates

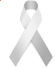

### Cancer-associated proteins

Detection of 162 proteins across 5 orders of magnitude in depleted plasma

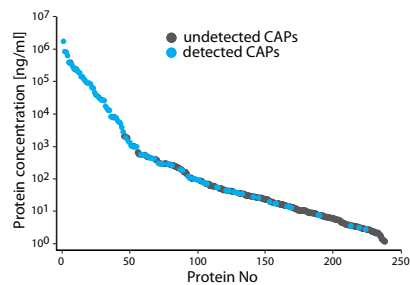

Estimated abundances from PeptideAtlas

Schubert *et al.* The Mtb Proteome Library: A Resource of Assays to Quantify the Complete Proteome of Mycobacterium tuberculosis. *Cell Host Microbe* (2013)  
 Hüttenhain *et al.* Reproducible Quantification of Cancer-Associated Proteins in Body Fluids Using Targeted Proteomics. *Sci Transl Med* (2012)

7

## STEP 3: PREPARING FINAL QUANTIFICATION METHOD

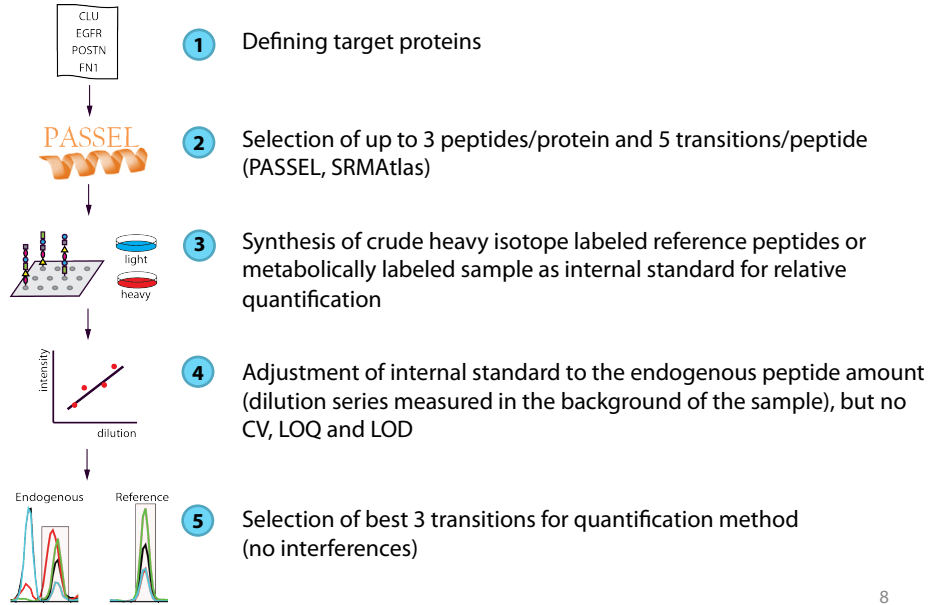

8

## STEP 3: PREPARING FINAL QUANTIFICATION METHOD

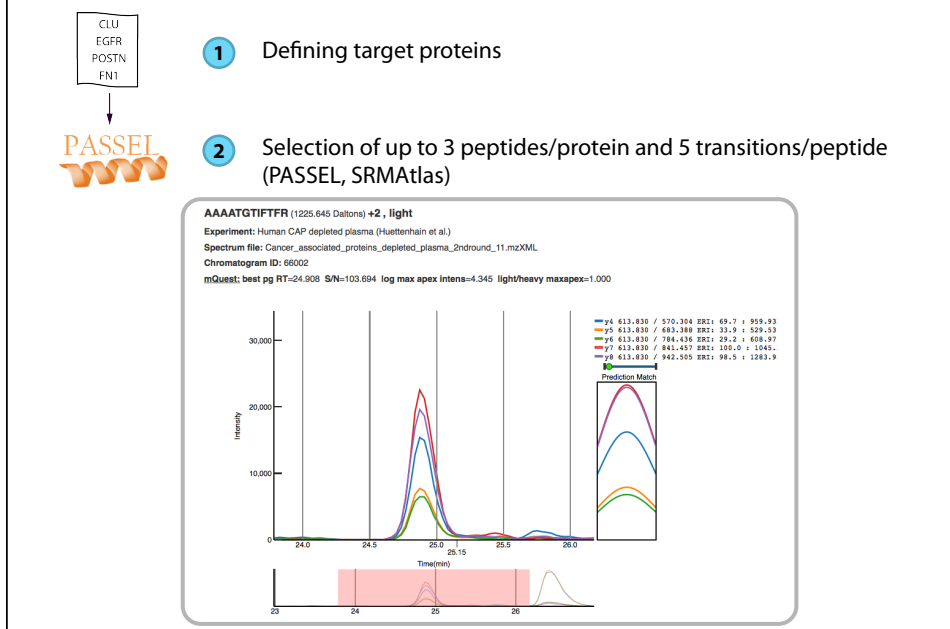

### STEP 3: PREPARING FINAL QUANTIFICATION METHOD

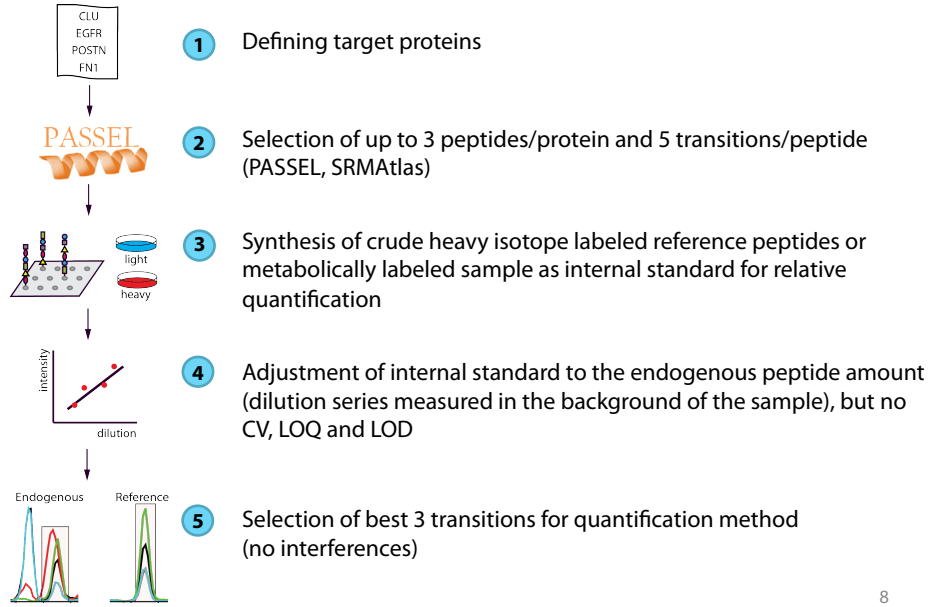

### STEP 3: PREPARING FINAL QUANTIFICATION METHOD

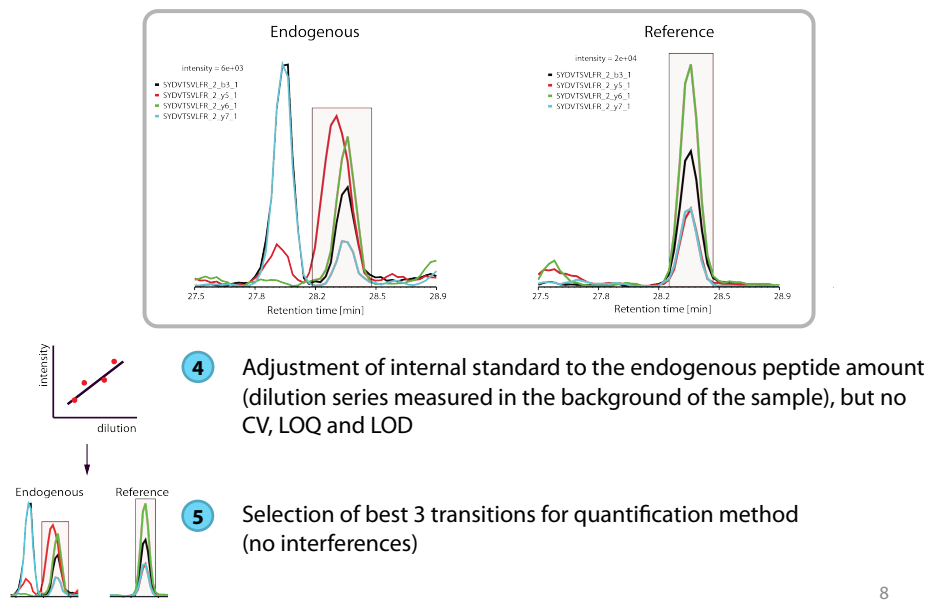

## STEP 4: SRM DATA ANALYSIS

### 1 Confidence in identification

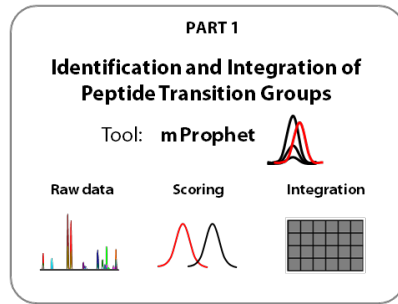

Integration and scoring of all detected peakgroups

Controlling FDR of identified peakgroups (FDR < 1%)

### 2 Confidence in quantification

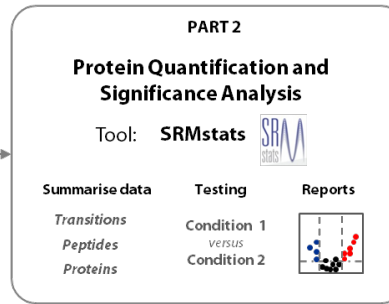

Protein significance analysis using linear mixed effect models

Controlling FDR for quantification (FDR < 5%)

## STEP 4: TIME COURSE IN MTB UNDER HYPOXIC STRESS

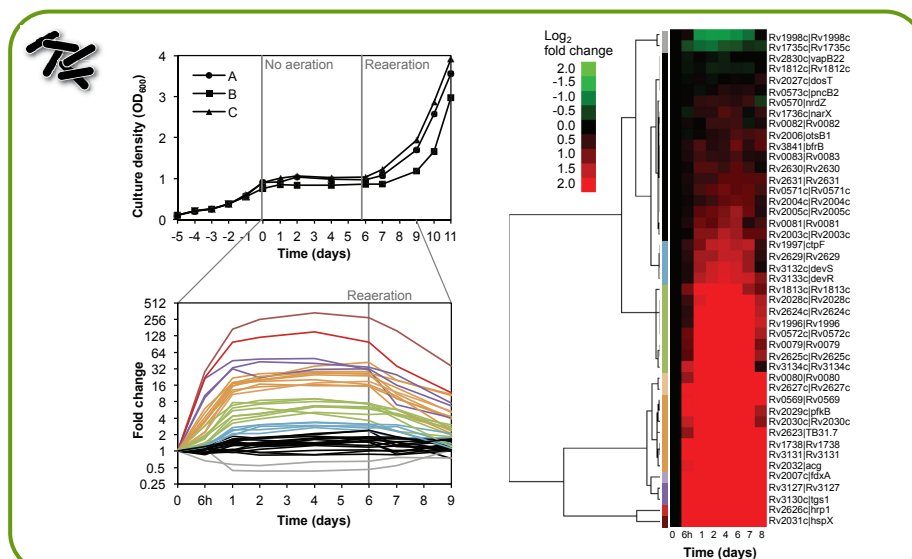

## STEP 4: CASE-CONTROL STUDY FOR OVARIAN CANCER

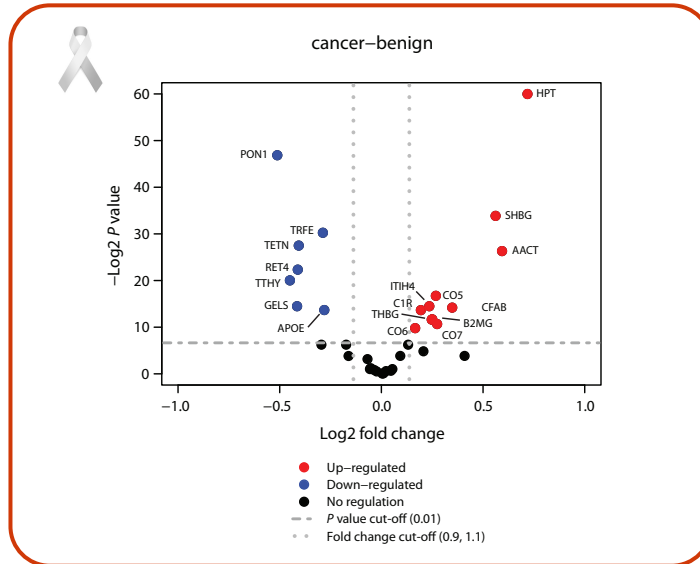

Hüttenhain et al. Reproducible Quantification of Cancer-Associated Proteins in Body Fluids Using Targeted Proteomics. *Sci Transl Med* (2012)

11

## QUESTIONS/ANSWERS I

1. Goal of the targeted MS experiment and plex-level
  - Consistent, quantitative measurements across large number of samples
  - Relative quantification of 20-100 proteins in a tryptic digest of complex biological/clinical samples (total cell lysates, tissue lysates, plasma) for basic research questions
2. ID confidence
  - SRM assay coordinates derived from confidently identified spectra
  - mQuest/mProphet analysis to match to assay coordinates and internal standard (if available)
  - FDR cutoff < 1% for confident identification
3. Quantification
  - Up to 3 peptides/protein (if possible) and 3 transitions/peptide
  - Crude heavy labeled peptides used for relative quantification

12

## QUESTIONS/ANSWERS II

4. Interference detection
  - 5 transitions/peptide initially tested in the sample of interest to select the transitions without interferences
  - Detection of the interferences using mProphet scoring and/or manual inspection in Skyline
5. Protein quantification based on measured peptide levels
  - Transition/peptide level measurements are combined into a protein measurements using statistical models implemented in SRMstats
6. Software and analytical tools
  - SRMAtlas: Dissemination and extraction of SRM assays
  - PASSEL: Dissemination and extraction of experimental SRM data
  - Skyline: Visualization of SRM data
  - mQuest/mProphet: ID confidence
  - SRMstats: statistical analysis/confidence in quantification

13

## INFORMATION REQUIRED FOR PUBLICATION

1. Assay generation
  - Description of the assay generation process
  - Selection criteria and number of peptides and transitions
  - Confidence measure for assay generation
  - Transition list including CE and RT/iRT
2. Quantification
  - Data evaluation
  - Confidence measure for identification/quantification
3. Significance Analysis
  - Statistical test
  - p-value/fold-change cutoff
4. Public availability/dissemination of data
  - SRMAtlas for SRM assays
  - PASSEL for SRM dataset
  - Skyline file

14

# Tier 3 Assays: Labeled Reference Peptide Method

Daniel C. Liebler  
Lisa J. Zimmerman

Vanderbilt University School of Medicine

## Labeled reference peptide method

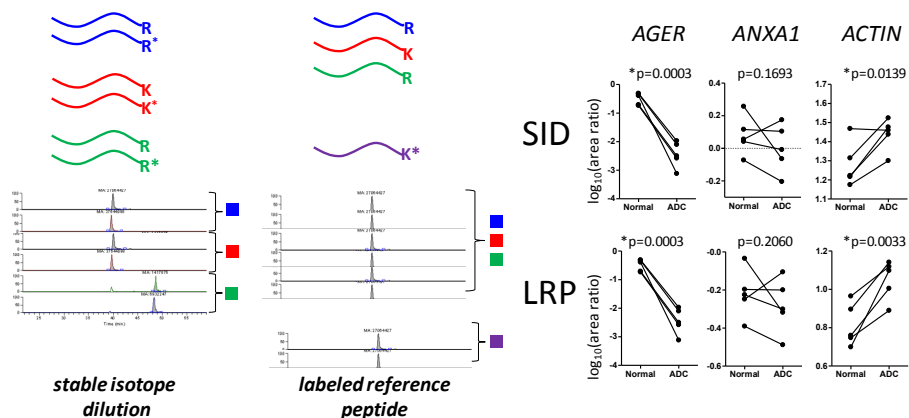

Zhang et al. (2011) Mol. Cellular Proteomics 10: M110.006593

## Q. What are the goals of our targeted MS experiments or software?

- Comparative quantitation between specimens and experiments
- Verify measurements from shotgun datasets
- Preliminary screening of biomarker candidates
- Pathway and system profiling

## Q. Who are the “customers” or likely users of the methods and results?

- Basic and translational research laboratories

## Metabolism Assay Panel

- 58 proteins in glycolysis, TCA and pentose phosphate pathways
- 216 peptides (4 transitions monitored per peptide)= 864 total transitions

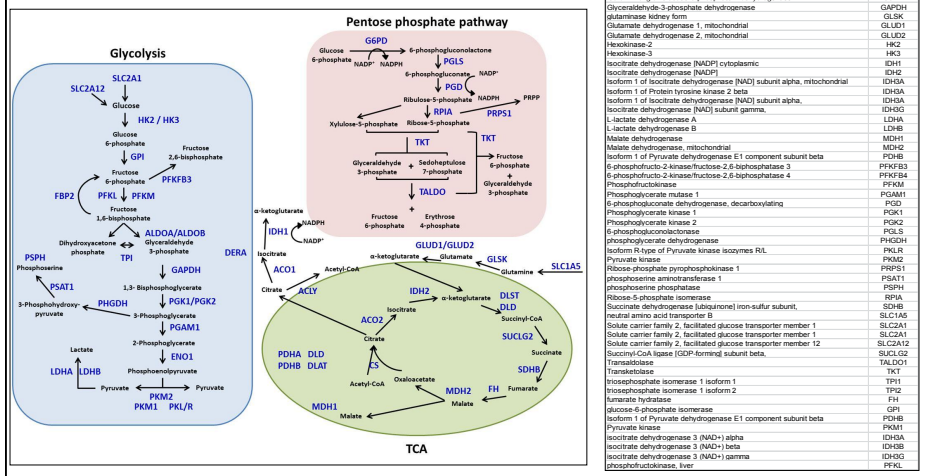



## Receptor tyrosine kinase/non-receptor tyrosine kinase panel

- PRM assays on Q-Exactive
- 83 proteins in RTK/nRTK pathways
- 310 peptides (4 transitions monitored per peptide) =1240 total transitions

**RTK (20 subfamilies; 54 proteins)**

**nRTK (29 proteins)**

|       |       |              |       |
|-------|-------|--------------|-------|
| ABL1  | HCK   | LIMK2        | TEC   |
| BLK   | IRAK3 | LYN          | TNK1  |
| BMX   | ITK   | PTK2 (FAK)   | TNK2  |
| BTX   | JAK1  | PTK6B (FAK2) | TXK   |
| DSTYK | JAK2  | PTK6         | TYK2  |
| FER   | JAK3  | SRC          | YES   |
| FES   | LCK   | SYK          | ZAP70 |
| FYN   |       |              |       |

| Protein Description                                 | Gene Name | Protein Description                                     | Gene Name |
|-----------------------------------------------------|-----------|---------------------------------------------------------|-----------|
| Epidermal growth factor receptor                    | EGFR      | Ephrin type-A receptor 3                                | EPHA3     |
| Receptor tyrosine-protein kinase erbB-2             | ERBB2     | Ephrin type-A receptor 4                                | EPHA4     |
| Receptor tyrosine-protein kinase erbB-3             | ERBB3     | Ephrin type-A receptor 6                                | EPHA6     |
| Receptor tyrosine-protein kinase erbB-4             | ERBB4     | Ephrin type-A receptor 7                                | EPHA7     |
| Fibroblast growth factor receptor 2                 | FGFR2     | Ephrin type-B receptor 1                                | EPHB1     |
| Fibroblast growth factor receptor 4                 | FGFR4     | Ephrin type-B receptor 2                                | EPHB2     |
| Insulin receptor                                    | INSR      | Ephrin type-B receptor 3                                | EPHB3     |
| Insulin-like growth factor 1 receptor               | IGF1R     | Ephrin type-B receptor 4                                | EPHB4     |
| Tyrosine-protein kinase receptor UFO                | AXL       | Ephrin type-B receptor 6                                | EPHB6     |
| Tyrosine-protein kinase Mer                         | MERTK     | Vascular endothelial growth factor receptor 1           | FLT1      |
| Hepatocyte growth factor receptor                   | MET       | Vascular endothelial growth factor receptor 2           | KDR       |
| FL cytokine receptor                                | FLT3      | Vascular endothelial growth factor receptor 3           | FLT4      |
| Alpha-type platelet-derived growth factor receptor  | PDGFRA    | Tyrosine kinase receptor Tie-1                          | TIE1      |
| Beta-type platelet-derived growth factor receptor   | PDGFRB    | Angiopoietin-1 receptor                                 | TEK       |
| Macrophage-stimulating protein receptor             | MST1R     | Tyrosine-protein kinase transmembrane receptor ROR1     | ROR1      |
| Mast/stem cell growth factor receptor               | KIT       | Proto-oncogene tyrosine-protein kinase receptor Ret     | RET       |
| Proto-oncogene tyrosine-protein kinase Src          | SRC       | High affinity nerve growth factor receptor              | NTRK1     |
| Tyrosine-protein kinase Lym                         | LYN       | BDNF/NT-3 growth factors receptor                       | NTRK2     |
| Ephrin type-A receptor 1                            | EPHA1     | NT-3 growth factor receptor                             | NTRK3     |
| Ephrin type-A receptor 2                            | EPHA2     | Tyrosine-protein kinase receptor TYRO3                  | TYRO3     |
| Muscle, skeletal receptor tyrosine-protein kinase   | MUSK      | Tyrosine-protein kinase JAK1                            | JAK1      |
| Fibroblast growth factor receptor 1                 | FGFR1     | Tyrosine-protein kinase JAK2                            | JAK2      |
| Fibroblast growth factor receptor 3                 | FGFR3     | Tyrosine-protein kinase JAK3                            | JAK3      |
| Macrophage colony-stimulating factor 1 receptor     | CSF1R     | Tyrosine-protein kinase SYK                             | SYK       |
| Ephrin type-A receptor 8                            | EPHA8     | Tyrosine-protein kinase ZAP-70                          | ZAP70     |
| Ephrin type-A receptor 10                           | EPHA10    | Tyrosine-protein kinase Fer                             | FER       |
| Tyrosine-protein kinase transmembrane receptor ROR2 | ROR2      | Tyrosine-protein kinase BTK                             | BTK       |
| Epithelial discoidin domain-containing receptor 1   | DDR1      | Interleukin 1 receptor-associated kinase 3              | IRAK3     |
| Discoidin domain-containing receptor 2              | DDR2      | Serine/threonine-protein kinase LMTK2                   | LMTK2     |
| Leukocyte tyrosine kinase receptor                  | LTK       | Tyrosine-protein kinase Tec                             | TEC       |
| ALK tyrosine kinase receptor                        | ALK       | Tyrosine-protein kinase Bcr                             | BLK       |
| Inactive tyrosine-protein kinase 7                  | PTK7      | Tyrosine-protein kinase TXK                             | TXK       |
| Tyrosine-protein kinase Fyn                         | FYN       | Dual serine/threonine and tyrosine protein kinase DSTYK | DSTYK     |
| Tyrosine-protein kinase Yes                         | YES1      | LIM domain kinase 2                                     | LIMK2     |
| Tyrosine-protein kinase Lck                         | LCK       | Tyrosine-protein kinase RYK                             | RYK       |
| Tyrosine-protein kinase Hck                         | HCK       | Proto-oncogene tyrosine-protein kinase R                | R1        |
| Tyrosine-protein kinase Itk                         | ITK       | Tyrosine-protein kinase STYK1                           | STYK1     |
| Focal adhesion kinase 1                             | PTK2      | Tyrosine-protein kinase Fes/Fps                         | FES       |
| Protein-tyrosine kinase 2-beta                      | PTK2B     | Epidermal growth factor receptor                        | EGFR      |
| Protein-tyrosine kinase 6                           | PTK6      | Hepatocyte growth factor receptor                       | MET       |
| Non-receptor tyrosine-protein kinase TYK2           | TYK2      | Mast/stem cell growth factor receptor                   | KIT       |
| Non-receptor tyrosine-protein kinase TNK1           | TNK1      | Proto-oncogene tyrosine-protein kinase Src              | SRC       |
| Activated CDC42 kinase 1                            | TNK2      | Ephrin type-B receptor 2                                | EPHB2     |
| Tyrosine-protein kinase ABL1                        | ABL1      | Ephrin type-B receptor 3                                | EPHB3     |
| Cytoplasmic tyrosine-protein kinase BMX             | BMX       | Protein-tyrosine kinase 2-beta                          | PTK2B     |

**Q. What range of analyte plex-level per-injection do you typically use in your experiments?**

| Plex-Level | Proteins | Method      | Example                                                       |
|------------|----------|-------------|---------------------------------------------------------------|
| Low        | < 5      | Unscheduled | SID methods (i.e. KRAS, BRAF mutants)                         |
| Medium     | 10-15    | Unscheduled | LRP approach                                                  |
| High       | > 15     | Scheduled   | Thematic Panels (metabolism, RTK/nRTK, etc) with LRP approach |

**Q. What is the impact of the plex-level used on the robustness and figures of merit (CV, LOD, LOQ) of the developed MRM/SRM assays?**

- CV independent of plex level under above scenarios
- LOD/LOQ not determined

**Q. Explain how you establish confidence that what is being measured is the analyte of interest.**

- Synthetic peptides are obtained for all analytes
  - New England Peptide FLASHPURE™ Peptide Array; 96-well plate format; 2-3 mg lyophilized material per well; no AAA; moderate purity (50-85%); MALDI-MS QC analysis for each peptide; \$3,300 per plate
- Preliminary analyses in our laboratory
  - master mix prepared; analyzed on MRM/SRM/PRM instrument to optimize transitions and obtain retention time
  - Standards enable exclusion of poor performers; development of scheduled methods

**Q. How do these methods differ from “Discovery Proteomics” using data-dependent or data-independent experiments?**

- analyses are targeted to specific analytes ( $m/z$  targets)

**Q. Explain your method of quantification, how many transitions you monitor and which ones are chosen to quantify.**

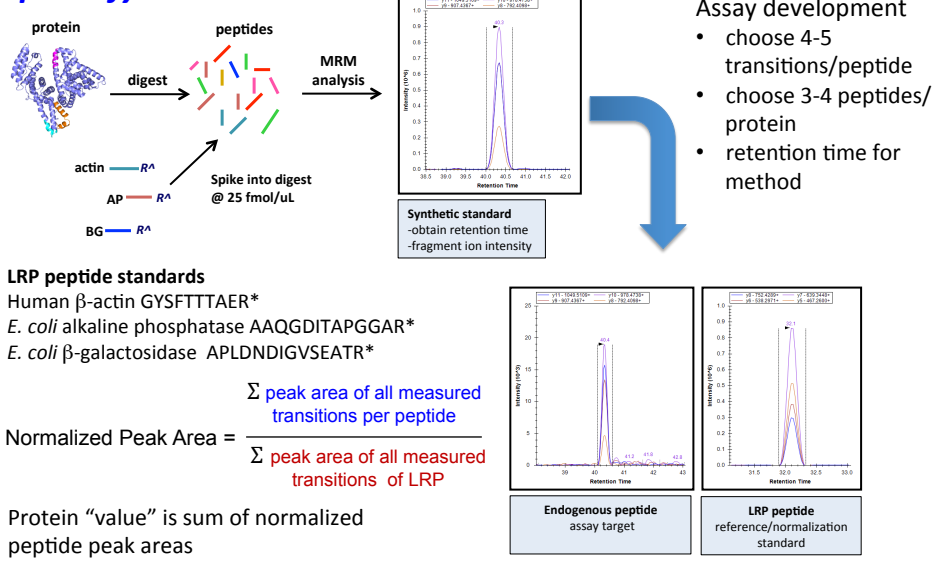

**Q. If you generate standard curves (calibration or response curve), explain how you use them to assess the quantitative accuracy of the assay (e.g., are the slope and y-intercept from the curve regression used in the calculating the analyte concentration in the sample? Is an external calibration curve used?**

- *Not applicable*

**Q. Can you provide a useful estimate or accurately determine the amount of protein in the matrix based on the measured levels of peptides? Explain how/why. Indicate experimental parameters such as number of peptides per protein and the criteria/computational tools applied. If you have multiple peptides from the same protein and each gives a different answer for the extrapolated protein level, how do you deal with this?**

- *Not applicable*

**Q. Describe methods you use to establish presence of interferences and how you deal with them if detected.**

- Synthetic peptide standards provide transition intensities under run conditions.
- Compare detected fragment ion patterns with those from authentic standard.
- Skyline and visual inspection of the fragment ion patterns
- Interferences in a specific transition lead to selection of an alternative fragment ion.
- AuDIT – developed at Broad Institute) Automated Detection of Inaccurate and imprecise Transitions (AuDIT) algorithm. Assists in detecting interferences by comparing the relative product ion intensities of the analyte peptide to those of the SIS.
- Typically spike three LRP standards; if there is an interference problem with one, the others can be used.

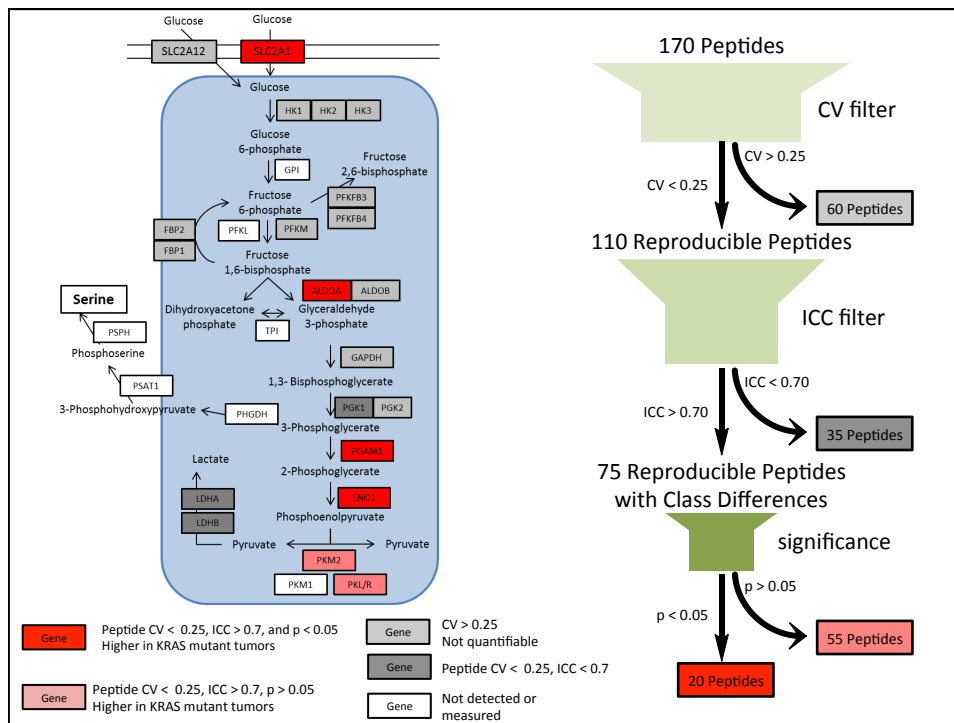

### Q. How do you account for suppression of ionization in your quantification method?

- Ionization suppression affecting whole runs or large segments may be evident from LRP peptide signal
- Transient suppression effects not detected or corrected in LRP method

***Q. What software and analytical tools do you use in your studies and why?***

- Skyline
- QuaSAR
- AuDIT
- Prototype data analysis package in “R” for CV and ICC determination

***Q. What information do authors need to provide in their manuscripts/supplement to enable reviewers and readers to understand what was done and to be able to judge the confidence of the measurements made?***

- List target peptides and transitions
- Peptide standards vs. predicted transitions
- CV for all peptide measurements
- CV for LRP peptides
- ICC for peptides across sample groups

## Acknowledgements

- Lisa Zimmerman
- Mike MacCoss
- Jaime Hutton
- Brendan MacLean
- Ming Li
- Rob Slebos
- U24CA59988 Clinical Proteomic Tumor Analysis Consortium
- De Lin
- Hye-Jung Kim
- Haixia Zhang

# Statistical design and analysis of targeted quantitative proteomic experiments

**Olga Vitek**

Statistics and computer science  
Purdue University

Special thank you:  
Veavi Chang and Meena Choi, Purdue University

## Customers and goals

- **Customers**
  - ◆ All users of targeted MS
    - biology & biomarker discovery
  - ◆ Not necessarily statisticians
- **Biotechnological goal**
  - ◆ Find differentially abundant proteins
- **Statistical goals**
  - ◆ Design: minimize bias & maximize efficiency
  - ◆ Analysis: effectively summarize all data
- **Overall goal**
  - ◆ Maximize reproducibility

### *Label-based SRM study of ovarian cancer*

R. Hüttenhain et al.

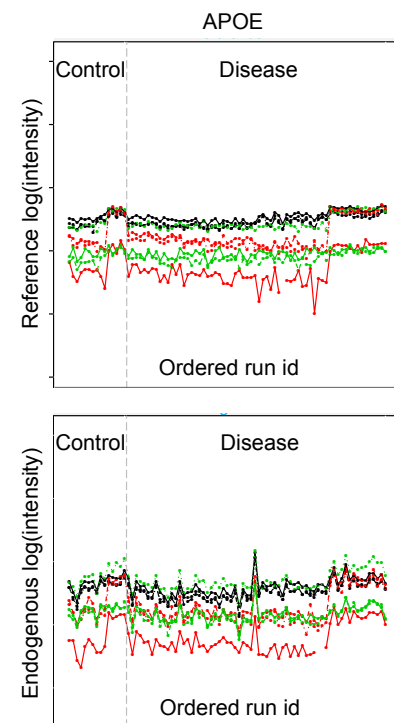

## Impact of multiplexing

(Study design)

- Impact of multiplexing
  - Multiple comparisons
  - Interferences and larger variation
  - + Learn variance from all proteins
- More important: assay design
  - ◆ Consistent protocol
  - ◆ Randomization & blocking
- Even more important: study design
  - ◆ *Subject selection*
    - Defined populations
    - Matching for confounding factors
    - Defined scope of conclusions
  - ◆ *Protein selection*
    - Biological variation
    - Expected changes

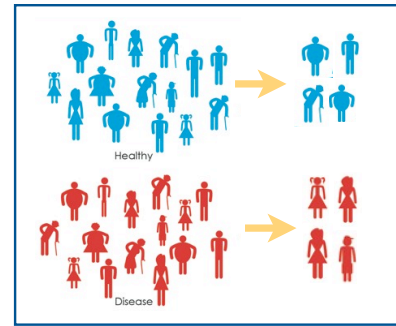

Complete randomization  
= inflated variance

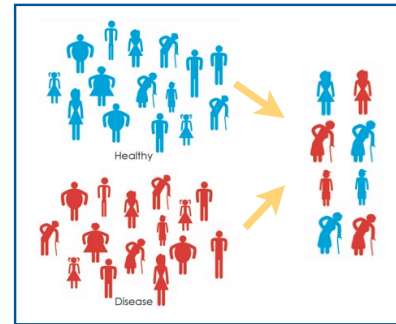

Matching  
= restricted randomization

Käll and Vitek, *PLoS Computational Biology*, 2011

## Impact of multiplexing

(Study design)

- Impact of multiplexing
  - Multiple comparisons
  - Interferences and larger variation
  - + Learn variance from all proteins
- More important: assay design
  - ◆ Consistent protocol
  - ◆ Randomization & blocking
- Even more important: study design
  - ◆ *Subject selection*
    - Defined populations
    - Matching for confounding factors
    - Defined scope of conclusions
  - ◆ *Protein selection*
    - Biological variation
    - Expected changes

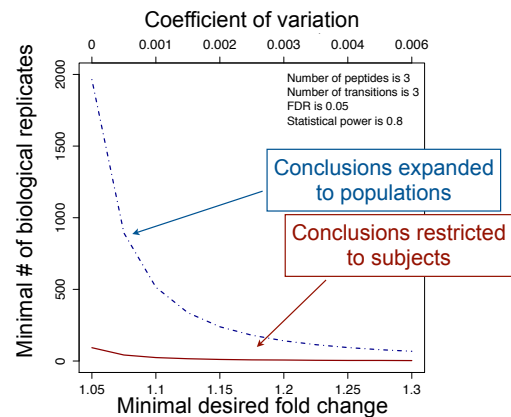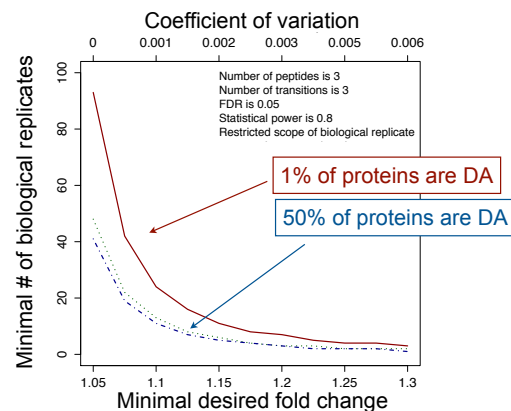

# Confidence in identification and quantification

5

(1: Identify and quantify the right transitions)

- **Current practice:**
  - ◆ *Consistency of*
    - Retention times of endogenous fragments
    - Relative intensities of fragments
    - Co-elution with reference peptides
- **Proposed, in addition:**
  - ◆ *Interferences propagate into between-run variation of intensities*
    - Weight each transition by the variation
    - Extra weight if needed (e.g. mProphet)
    - Set small weights to 0

|          | Sensitivity<br>N = 15, 66 | Specificity<br>N = 7, 8 |
|----------|---------------------------|-------------------------|
| All      | 0.71                      | 0.53                    |
| Proposed | 0.88                      | 0.75                    |

**Sensitivity: literature**  
**Specificity: controls vs controls**

Chang et al., ASMS 2013

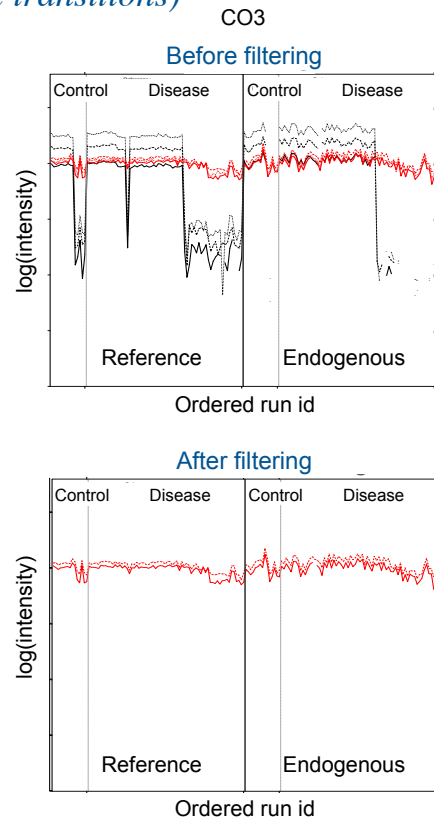

# Confidence in identification and quantification

6

(2: Enhance the accuracy with internal standards)

- **Current practice:**
  - ◆ Internal standards enhance our ability to detect DA proteins
- **Proposed:**
  - ◆ The full collection of reference transitions is unnecessary
  - ◆ Can predict intensities of missing reference transitions from the observed
    - Particularly helpful in large-scale confirmatory studies

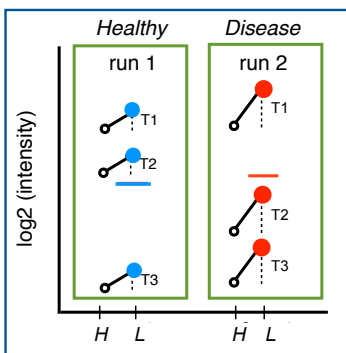

Chang et al., MCP 2012  
Chang et al., ASMS 2012

## Label-based SRM study of mouse metabolism

E. Sabidó et al.

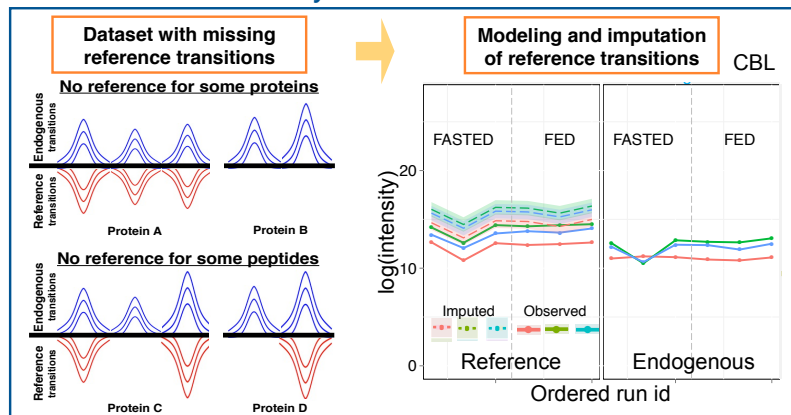



## Accuracy assessment with standard curves

(Agreement with known concentrations, or with other methods)

- **Current practice**
  - Correlation & regression are flawed
  - Measure association, not agreement
    - arbitrary high correlations and  $R^2$  by increasing the spread on X axis
    - more noise leads to better apparent agreement with the 45° line
- **Better metrics:**
  - + Bias and variance wrt known concentrations
  - + Paired differences wrt alternative methods
- **LOD and LOQ are not always needed**
  - ◆ Assays with an acceptable dynamic range can focus on changes in abundance
    - Standard curves are not informative of biological variation

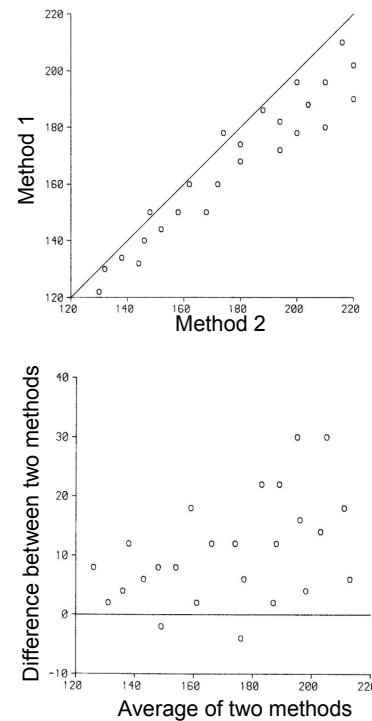

Altman and Bland, *The Statistician*, 1983

Altman and Bland, *The Lancet*, 1986

## Protein-level quantification

(Detection of changes in protein abundance, summarized over peptides)

- **Linear mixed effects model**
  - ◆ Jointly model all measurements of a protein
  - ◆ Input:  $\log(\text{intensity of transition})$  (i.e. not ratio)
- **User assumption: nature of interferences**
  - ◆ *Additive model: interferences are noise*
    - Less sensitive, more specific
  - ◆ *Model with interactions: systematic interferences*
    - More sensitive, less specific
- **User assumption: scope of conclusions**
  - ◆ *Expanded to the underlying population*
    - Less sensitive, more specific
    - Needs random sampling and large sample size to characterize the variation in the population
  - ◆ *Restricted to the subjects in the study*
    - More sensitive, less specific

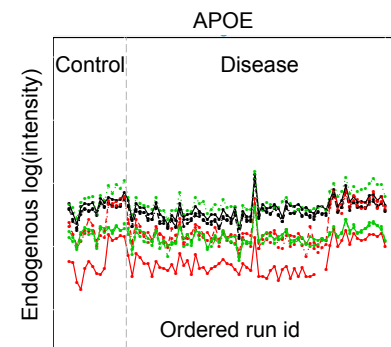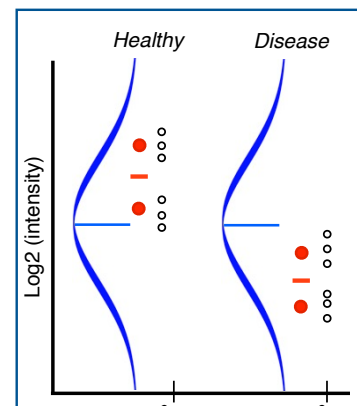

## What is a good assay?

(Does it answer the research question?)

- Accurately quantifies analytes?
  - ◆ LOQ and LOD, dynamic range
- Detects differential abundance?
  - ◆ *Dynamic range & technical variation*
    - Versus expected biological change & technical variation
    - On average over subjects
- Can be used as a biomarker?
  - ◆ *Is predictive?*
    - For an individual subject
  - ◆ *Is accurate?*
    - Sensitivity & specificity of classification
    - Evaluated on an independent validation set

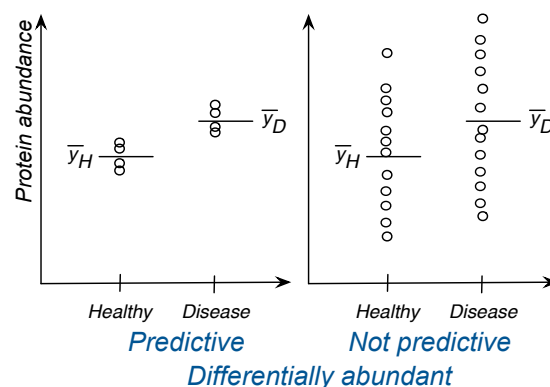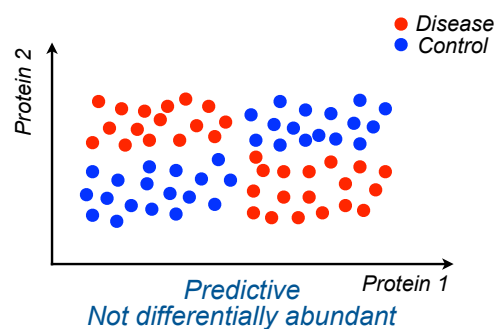

## Software and analytical tools

(Statistical software for relative protein quantification)

- Input
  - ◆ Statement of the problem
    - Groups to compare, scope of conclusions
  - ◆ Experimental design
  - ◆ Identified and quantified transitions
- Data analysis
  - ◆ Label-free, label-based; LC-MS, SRM, DIA
  - ◆ Group comparison, time course
- Experimental design
  - ◆ # of biological samples, peptides, transitions
  - ◆ *New:* # of reference proteins & peptides
  - ◆ *New:* a subset of informative features
- Availability
  - ◆ R-based, open-source

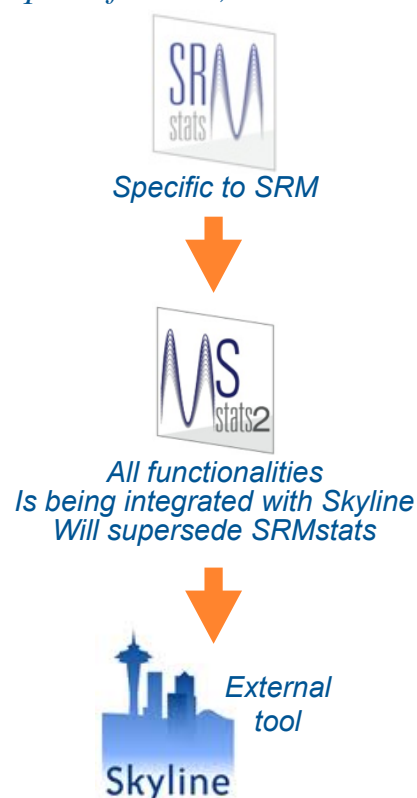

# Information in manuscripts

(Ensure reproducible research)

Reporting determines the scope of reproducibility

| <b>Not repeatable</b>                                                                                                          | <b>Repeatable data analysis</b>                                                                                                                                 | <b>Reproducible data analysis</b>                                                                                                                              | <b>Repeatable experiment</b>                                                                                                                            | <b>Reproducible experiment</b>                             |
|--------------------------------------------------------------------------------------------------------------------------------|-----------------------------------------------------------------------------------------------------------------------------------------------------------------|----------------------------------------------------------------------------------------------------------------------------------------------------------------|---------------------------------------------------------------------------------------------------------------------------------------------------------|------------------------------------------------------------|
| <i>Publication only</i>                                                                                                        | <i>Same results with same data analysis steps</i>                                                                                                               | <i>Same results with slightly different data analysis steps</i>                                                                                                | <i>Same results with new experiment &amp; same subjects</i>                                                                                             | <i>Same results with new experiment &amp; new subjects</i> |
| <ul style="list-style-type: none"> <li>• Data</li> <li>• Annotations</li> <li>• Software</li> <li>• Executable code</li> </ul> | <ul style="list-style-type: none"> <li>• Scientific question</li> <li>• Statistical questions</li> <li>• Assumptions</li> <li>• Scope of conclusions</li> </ul> | <ul style="list-style-type: none"> <li>• Sample allocation</li> <li>• Sample handling</li> <li>• Sample preparation</li> <li>• Spectral acquisition</li> </ul> | <ul style="list-style-type: none"> <li>• Populations</li> <li>• Subject selection</li> <li>• Target selection</li> <li>• Estimated variation</li> </ul> |                                                            |

**Example guidelines:**

REporting recommendations for tumor MARKer prognostic studies (REMARK). *Nature Clinical Practice Oncology*. 2005  
 Transparent Reporting of Clinical Trials (CONSORT). [www.consort-statement.org/consort-statement](http://www.consort-statement.org/consort-statement)  
 Nature Journals: Reporting checklist for life sciences articles. [www.nature.com/authors/policies/checklist.pdf](http://www.nature.com/authors/policies/checklist.pdf)

Large literature available

## Automated & Reproducible Data Analysis Tools for Targeted Proteomics:

### The QuaSAR Pipeline

[Quantitative and Statistical Analysis of Reaction Monitoring Results]

D. R. Mani

manidr@broadinstitute.org

Representing

Susan Abbatiello, Rushdy Ahmad, Deepak Mani and Steven Carr

Fit-for-purpose Assay Workshop  
Jun 18, 2013

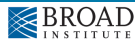

Proteomics and Biomarker Discovery

## Goals: QuaSAR as an automated pipeline for MRM-MS data analysis

- Create an easy to use, automated platform for analysis of MRM-MS data
  - Generally applicable when multiple precursor-product pairs (transitions) are measured (e.g., parallel reaction monitoring)
  - Enable laboratory technicians or scientists to quickly perform standard analysis without statistical / computing expertise
- Encapsulate the best algorithms for commonly performed analyses
  - Calibration curves
  - Assay characterization and metrics
- Enable reproducible data analysis

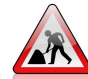

Some Features  
under Construction

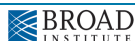

Proteomics and Biomarker Discovery

## QuaSAR is optimized for targeted analysis with isotopically labeled internal standards

- Use of isotopically labeled peptide standards (with multiple transitions monitored per precursor) allows:
  - Confident identification of analyte being measured
  - Identification of interferences
  - More precise quantitation
    - Accounts for
      - » Ionization efficiency
      - » Run-to-run variation
  
- Some QuaSAR features are available only when internal standards are present

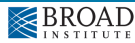

Proteomics and Biomarker Discovery

### QuaSAR Software for high throughput MRM assay development

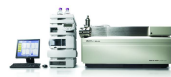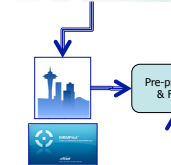

Vendor Independent

Public Release (Aug 2012):  
genepattern.broadinstitute.org

### Interference & Imprecision Detection

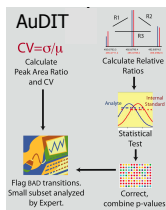

### Detection Limits & Precision

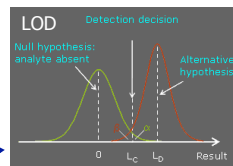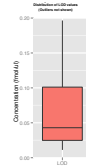

Modular  
Easy addition of  
new algorithms

### Calibration

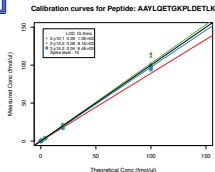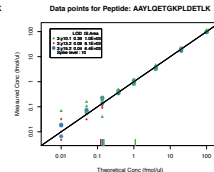

Calibration Curves & Regression

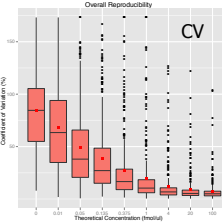

Visualization & Publication Quality Plots

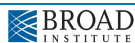

Proteomics and Biomarker Discovery

Mani, Abbatiello, Ahmad, Mani and Carr, 2013. Manuscript in Preparation

## QuaSAR Input Data:

Exports from peak integration software

- Raw MRM-MS data is processed using peak integration software
  - E.g.: Skyline, Multi-Quant, Pinpoint
- Peak integration software determines:
  - Peak location
  - Identity / match to standard
  - Peak area, height, FWHM, and other peak characteristics
- QuaSAR input:
  - Exported table from peak integration software
  - Concentration, sample grouping and replicate info

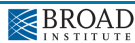

Proteomics and Biomarker Discovery

## Calibration / Response Curves

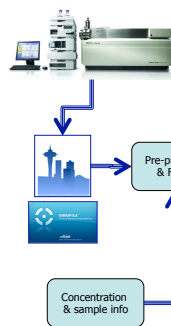

- For each peptide QuaSAR outputs:
  - **Linear calibration curves** for every monitored transition for the peptide;
  - **Log plots** to visualize all raw data points, and identify trends.
- Calibration curves are fitted using **robust, weighted regression**.
  - Tables provide:
    - Slope and intercept along with **confidence intervals**
- Calibration curves can be based on:
  - Concentration (= PAR \* IS Concentration)
  - Peak area ratio (= Analyte Peak Area / IS Peak Area)
  - Analyte peak intensity (area)



Proteomics and Biomarker Discovery

## Calibration / Response Curves Quasar Output

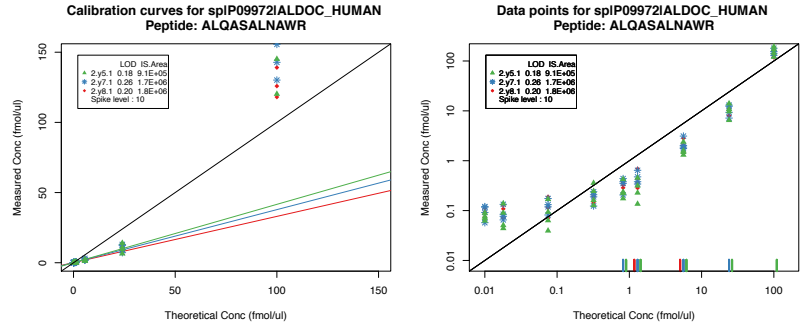

| peptide          | transition.id | slope      | slope stderr | y-intercept  | y-intercept stderr |
|------------------|---------------|------------|--------------|--------------|--------------------|
| AAYLQETGKPLDETLK | 2.y7.1        | 0.01472712 | 0.003205305  | -0.000119491 | 8.35E-05           |
| AAYLQETGKPLDETLK | 2.y9.1        | 0.01078705 | 0.003212164  | -0.000314087 | 8.36E-05           |
| AEVNGLAQAQ GK    | 2.y5.1        | 0.31772655 | 0.049735831  | -0.001208592 | 0.001294958        |
| AEVNGLAQAQ GK    | 2.y8.1        | 0.25086684 | 0.027051172  | -0.003264394 | 0.000704324        |
| AEVNGLAQAQ GK    | 2.y7.1        | 0.28192988 | 0.049231984  | -0.002154075 | 0.00128184         |
| AGLCQTFVYGGCR    | 2.y8.1        | -0.6687997 | 0.44916624   | 29.75333306  | 0.011694819        |
| AGLCQTFVYGGCR    | 2.y7.1        | -0.1765    | 0.548283165  | 32.56094202  | 0.014275499        |

Regression Table

## Interference & Imprecision Detection using AuDIT

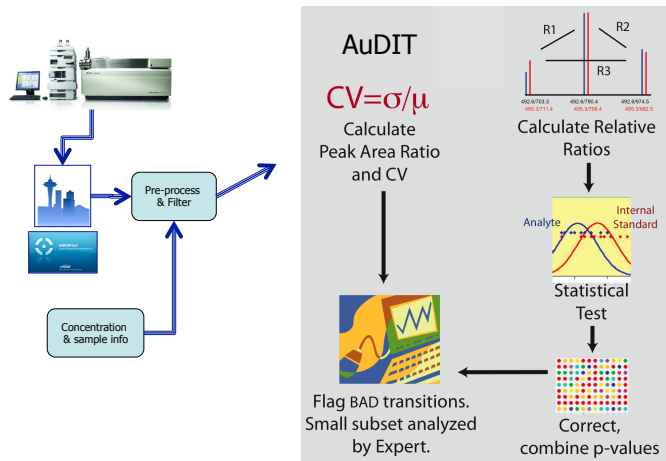

## Interference & Imprecision Detection using AuDIT Quasar Output

Data points for splP09972IALDOC\_HUMAN  
Peptide: ALQASALNAWR

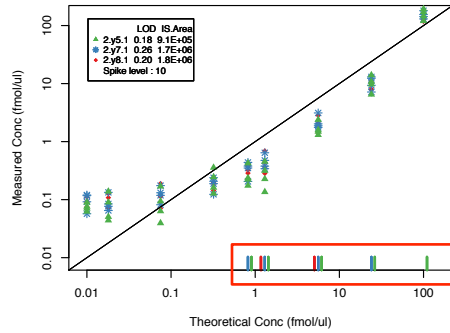

Transitions with  
interference or  
high CV

AuDIT Table

| peptide      | sample | transition.id | pvalue.final | status | cv         | cv.status | final.call |
|--------------|--------|---------------|--------------|--------|------------|-----------|------------|
| AEVNGLAAQ GK | I      | 2.y5.1        | 0.999436761  | good   | 0.26378578 | bad       | bad        |
| AEVNGLAAQ GK | I      | 2.y7.1        | 0.999973076  | good   | 0.17551101 | good      | good       |
| AEVNGLAAQ GK | I      | 2.y8.1        | 0.999998359  | good   | 0.34918799 | bad       | bad        |
| AEVNGLAAQ GK | J      | 2.y5.1        | 0.529145605  | good   | 0.11329347 | good      | good       |
| AEVNGLAAQ GK | J      | 2.y7.1        | 0.558946276  | good   | 0.09584199 | good      | good       |

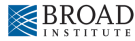

Proteomics and Biomarker Discovery

## Limits of Detection (LOD) & Quantification (LOQ)

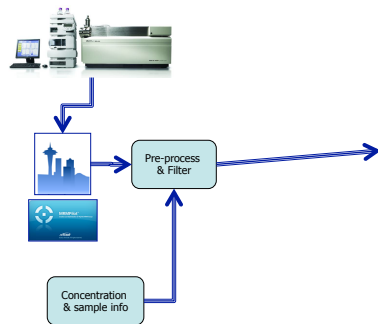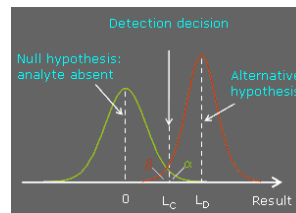

- Default method for calculating LOD and LOQ uses the **blank (b)** and a **low concentration sample (s)**:

$$\text{LOD} = \text{mean}_b + t_{(1-\alpha)} s.d_b + t_{(1-\beta)} s.d_s$$

$$\text{LOQ} = 3 \times \text{LOD}$$

- Other methods—ranging from algorithms using only the blank sample, to those that use the entire calibration curve, are also available for calculating LOD and LOQ in specific experimental settings.

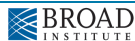

Proteomics and Biomarker Discovery



## Limits of Detection (LOD) & Quantification (LOQ) Quasar Output

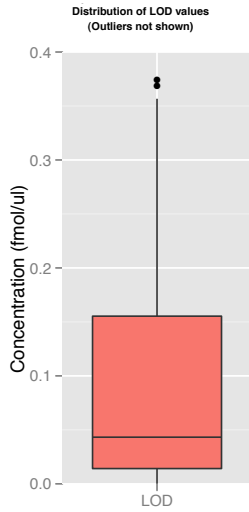

| peptide         | transition.id | LOD        | LOQ        |
|-----------------|---------------|------------|------------|
| ALQASALNAWR     | 2.y8.1        | 0.20200176 | 0.60600528 |
| ALQASALNAWR     | 2.y5.1        | 0.18219591 | 0.54658772 |
| ALQASALNAWR     | 2.y7.1        | 0.26102768 | 0.78308304 |
| ALYEAGER        | 2.y7.1        | 0.00664957 | 0.01994872 |
| ALYEAGER        | 2.y5.1        | 0.10399518 | 0.31198554 |
| ALYEAGER        | 2.y4.1        | 0.03927739 | 0.11783216 |
| AMVALIDVFHQYSGR | 3.y9.1        | 0.04975135 | 0.14925406 |
| AMVALIDVFHQYSGR | 3.y7.1        | 0.02702137 | 0.08106411 |
| AMVALIDVFHQYSGR | 3.y6.1        | 0.0360675  | 0.1082025  |

All Transitions

Quantifying Transitions

| peptide         | transition.id | LOD        | LOQ        |
|-----------------|---------------|------------|------------|
| ALQASALNAWR     | 2.y5.1        | 0.18219591 | 0.54658772 |
| ALYEAGER        | 2.y7.1        | 0.00664957 | 0.01994872 |
| AMVALIDVFHQYSGR | 3.y7.1        | 0.02702137 | 0.08106411 |

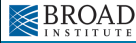

Proteomics and Biomarker Discovery

## Choice of quantifying transition

- Lowest LOD
  - Uses only a single transition to quantify peptide; other transitions are ignored
- Sum of transitions with no interferences
  - More robust
  - If new samples have different interferences, transitions constituting the sum can change, resulting in inconsistencies.

Calibration curves for spIP54727IRD23B\_HUMAN  
Peptide: IDIDPEETVK

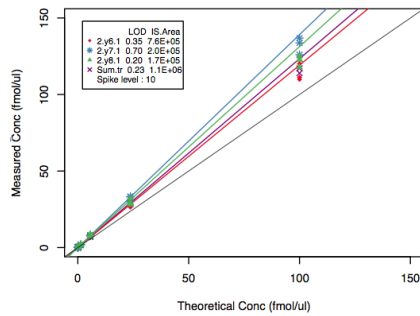

Data points for spIP54727IRD23B\_HUMAN  
Peptide: IDIDPEETVK

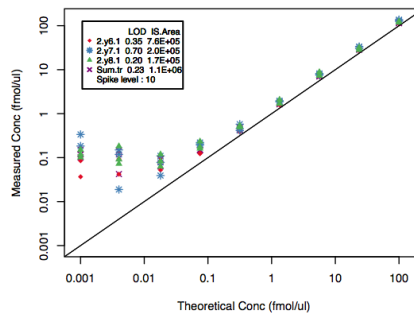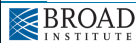

Proteomics and Biomarker Discovery

## Assay Precision: Coefficient of Variation

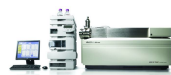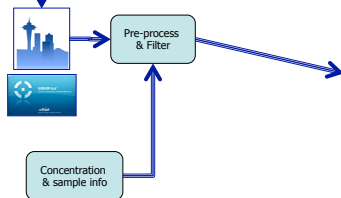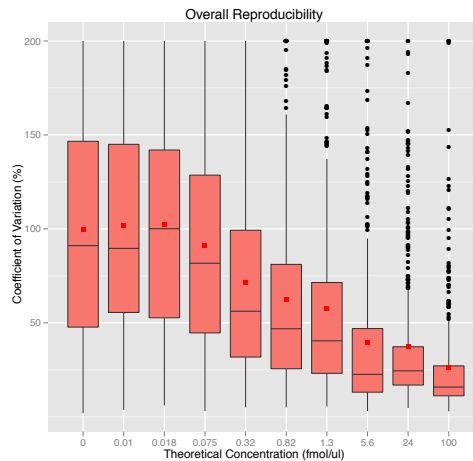

CV Table for Quantifying Transitions

| sample | peptide    | transition.id | concentration | cv    | mean.concentration |
|--------|------------|---------------|---------------|-------|--------------------|
| D      | AEVNGLAAGK | 2.y7.1        | 0.075         | 155   | 0.01567            |
| E      | AEVNGLAAGK | 2.y7.1        | 0.32          | 101.5 | 0.1243             |
| F      | AEVNGLAAGK | 2.y7.1        | 0.82          | 54.42 | 0.2574             |
| G      | AEVNGLAAGK | 2.y7.1        | 1.3           | 88.33 | 0.1077             |
| H      | AEVNGLAAGK | 2.y7.1        | 5.6           | 52.39 | 1.216              |
| I      | AEVNGLAAGK | 2.y7.1        | 24            | 17.55 | 7.154              |
| J      | AEVNGLAAGK | 2.y7.1        | 100           | 9.584 | 48.01              |

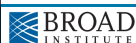

Proteomics and Biomarker Discovery

## New / Unknown Samples

- Configured assays can be run on new samples and the resulting data processed using QuaSAR
  - New samples are indicated using a missing value for the sample concentration in the concentration map
- QuaSAR calculates mean concentration and CV for each monitored transition
- Response curve is currently ignored during new sample concentration determination
  - Need to address response curve application when new samples are run separately from calibration curve samples.

| sample | peptide          | transition.id | concentration | cv    | mean.concentration |
|--------|------------------|---------------|---------------|-------|--------------------|
| 4      | AAYLQETGKPLDETLK | 2.y10.1       | NA            | 140.6 | 0.007957           |
| 25     | AAYLQETGKPLDETLK | 2.y10.1       | NA            | 108.3 | 0.3747             |
| 75     | AAYLQETGKPLDETLK | 2.y10.1       | NA            | 65.8  | 1.057              |

CV Table for New Samples (Quantifying Transitions)

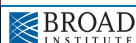

Proteomics and Biomarker Discovery

## QuaSAR supports alternate workflows

- "Reverse Calibration Curves"
  - Internal standard concentration is varied, keeping the analyte level constant
  - Used in situations where background matrix has endogenous analyte present
- Alternate internal standards
  - E.g.: Pre-digestion protein standards + post-digestion peptide standards to account for digestion efficiency / recovery
- No internal standards
  - Calculations based on peak area
  - QuaSAR does not confirm confident identification of peptide
    - Identification step delegated to peak integration software
- Sample processing variants with MRM-MS quantification
  - E.g.: iMRM-MS



Proteomics and Biomarker Discovery

## QuaSAR in GenePattern

The screenshot shows the GenePattern interface for the QuaSAR workflow. The main content area is titled "QuaSAR version 1" and contains a "Documentation" link. Below this, there are several input fields and options:

- skyline file\***: Includes "Upload File...", "Add Path or URL...", and "drop files here" buttons. A "Batch" checkbox is also present.
- concentration file\***: Includes "Upload File...", "Add Path or URL...", and "drop files here" buttons. A "Batch" checkbox is also present.
- title\***: A text input field.
- analyte\***: A text input field with a note: "User must specify the exact analyte column header name as it appears in the input CSV file. The default is 'light Area'".
- standard\***: A text input field with a note: "User must specify the exact internal standard column header name as it appears in the input CSV file. The default is 'heavy Area'".
- generate cv table\***: A dropdown menu with "yes" selected.
- generate calcurves\***: A dropdown menu with "yes" selected.
- generate lodloq table\***: A dropdown menu with "yes" selected.
- generate peak area plots\***: A dropdown menu with "no" selected.
- use par\***: A dropdown menu with "no" selected.
- max calcurve linear scale\***: A text input field with "100" entered.
- max calcurve log scale\***: A text input field with "100" entered.
- perform audit\***: A dropdown menu with "yes" selected.
- audit cv threshold\***: A text input field with "0.2" entered.
- output prefix\***: A text input field with "<skyline.file\_basename>" entered.

At the bottom of the page, there is a "Broad Institute" logo and the text "Proteomics and Biomarker Discovery".

## QuaSAR enables high-throughput analysis of multiple MRM-MS experiments

- Plots show median CV for a set of calibration curve samples with increasing concentration.
- Identical samples with pre-specified SOP were analyzed on 14 different instruments spanning 9 laboratories
- Data were processed using QuaSAR and plots created from QuaSAR output
  - QuaSAR analysis + plots took less than a day!

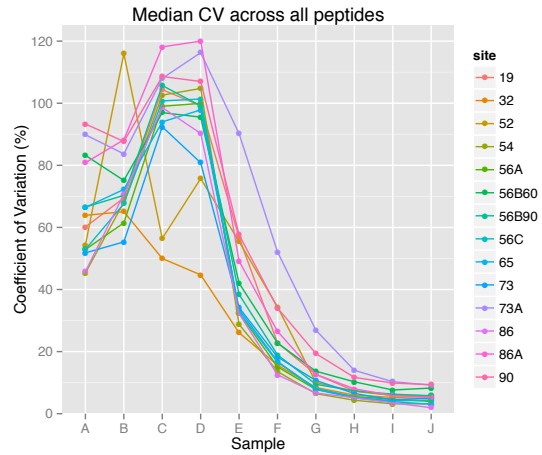

## QuaSAR enables high-throughput analysis of multiple MRM-MS experiments

- Plots show LOD distribution for peptides at each site.
- Identical samples with pre-specified SOP were analyzed on 14 different instruments spanning 9 laboratories
- Data were processed using QuaSAR and plots created from QuaSAR output
  - QuaSAR analysis + plots took less than a day!

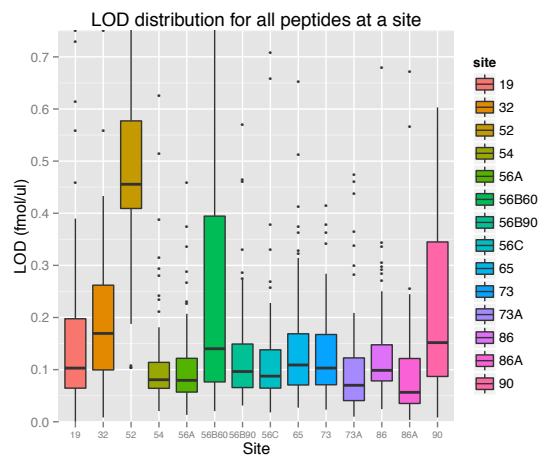

## Summary of QuaSAR features

- QuaSAR implements a comprehensive, easy to use pipeline for MRM-MS data analysis including:
  - **Statistics:** For every monitored peptide
    - Coefficient of variation (CV)
    - Regression slope and intercept (with confidence intervals)
    - Interference detection, and
    - Limits of detection (LOD) and quantification (LOQ)
  - **Visualization:** Succinct visual summaries of various results including reproducibility, interferences and detection limits are generated.
  - **Interpretation:** Statistics and visualization are integrated to enable effective data interpretation, understanding and insight.

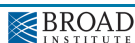

BROAD  
INSTITUTE

Proteomics and Biomarker Discovery

## QuaSAR can promote standardization of data analysis in manuscripts

- Use of QuaSAR results in reproducible data analysis:
  - QuaSAR version + parameter settings completely specifies analysis
  - Easy replication of data analysis at other sites/laboratories
- Custom analysis would require authors to specify:
  - Determination and use of response/calibration curves
  - Interference detection and action taken
  - Assessment of assay precision
  - Specification of assay sensitivity (limits of detection/quantification)



BROAD  
INSTITUTE

Proteomics and Biomarker Discovery

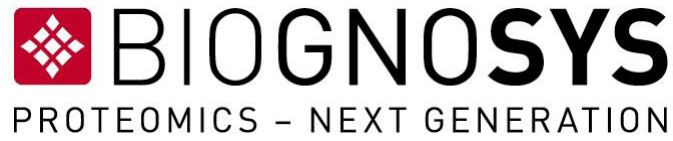

## National Institute of Health Assay Workshop – Data Analysis

Lukas Reiter

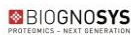

1

### 1) Goals and Customers

- What are the goals of your targeted MS experiments or software?
- Who are the “customers” or likely users of the methods and results?

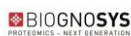

2

# 1) Goals and Customers

## Goals

### As a Company

- Robust and easy to use products

### For Technology

- Suitability to answer question
- Sensitivity
- Quantitative accuracy/precision
- Sample throughput
- Analyte throughput

### Of Experiments

- Discovery (DIA)
- Mechanistic insight
- Biomarker validation
- Absolute quantification
- Monitor specific modification

### For Software

- Automated
- Objective and results comparable
- Robust and flexible (chromatography, technology, plex-level,...)

# 1) Goals and Customers

## Customers

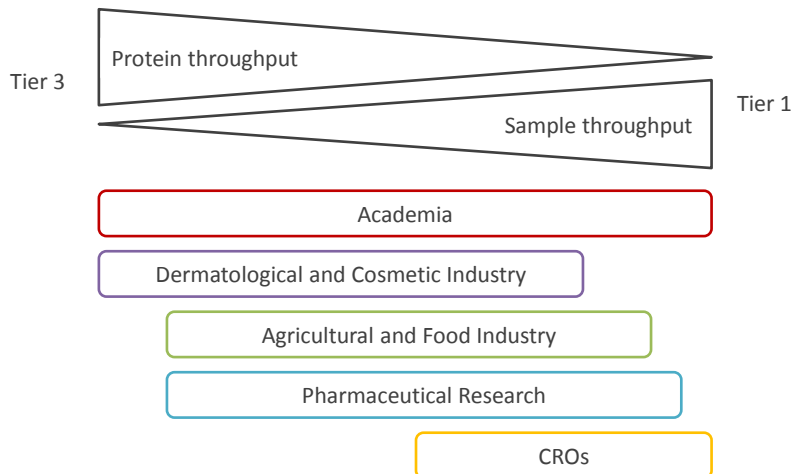

## 2) Plex Level

- What range of analyte plex-level per-injection do you typically use in your experiments?
- What is the impact of the plex-level used on the robustness and figures of merit (CV, LOD, LOQ) of the developed MRM/SRM assays?

## 2) Plex Level

*Range*

- DIA
  - Label free
  - Label (2-plex)
- MRM/PRM
  - Plex level 1 or 2

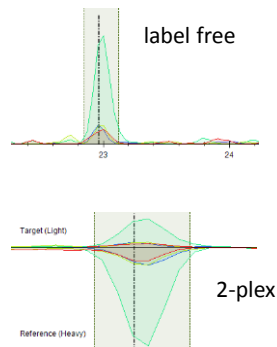



## 2) Plex Level

*Impact*

Influence on LOD, LOQ  
and CV not systematically  
checked

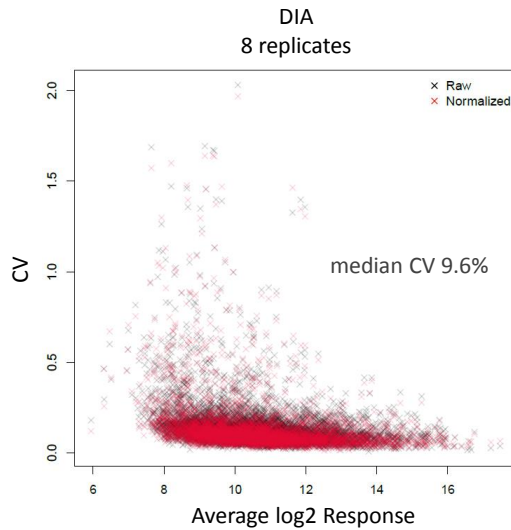

## 3) Analyte Identification

- Explain how you establish confidence that what is being measured is the analyte of interest (e.g., match to spectra of an internal standards, match to reference spectra from discovery experiments, RT, etc.).
- How do these methods differ from “Discovery Proteomics” using data-dependent or data-independent experiments?

### 3) Analyte Identification

#### Method – Scoring

- Internal scores
  - Shape correlation
- External scores
  - Relative fragment ion current
  - iRT (retention time)
- Plex scores
  - Relative fragment ion current
  - iRT (retention time)
  - Shape correlation

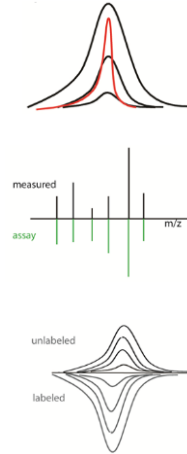

### 3) Analyte Identification

#### Method – Scoring

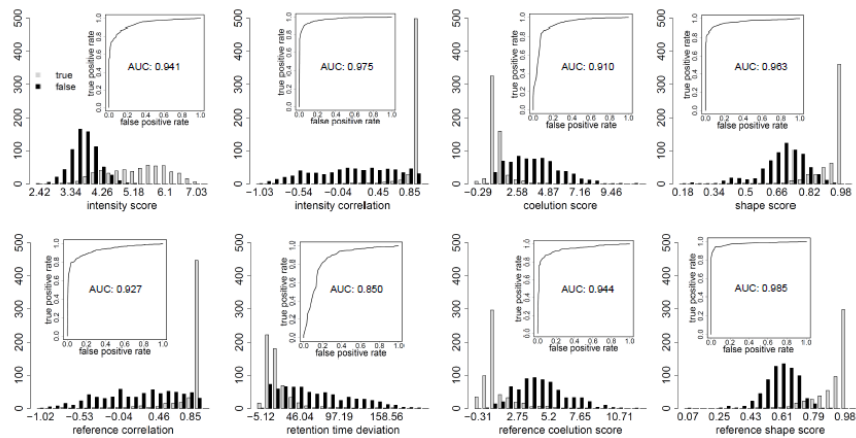

■ True signal  
■ False signal

### 3) Analyte Identification

Method – Scoring

**Workflows**

- Label free
- 2-plex
  - “Spike in” (typically SIS)
    - Peak detection on internal standard
    - Peak scoring on endogenous
  - “Label”
    - Peak detection and scoring on both channels

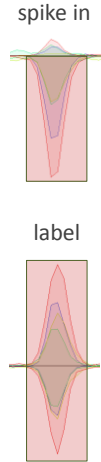

### 3) Analyte Identification

Method – Scoring

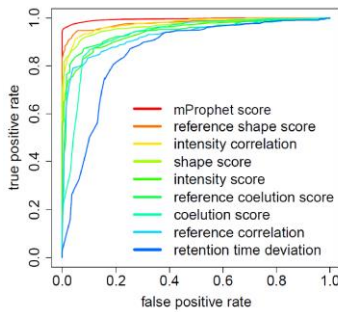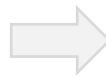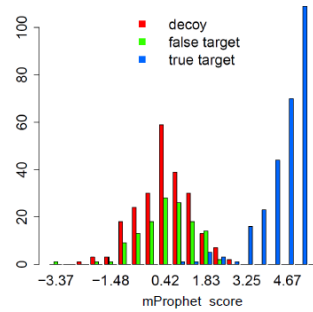

Scores are optimally combined using semi-supervised machine learning

### 3) Analyte Identification

Method – Qvalues or false discovery rates

#### How to estimate Qvalues (FDR) in MRM?

- Statistically characterize the signals that result from an assay being measured in a matrix where the analyte is not detectable

#### Decoy transitions

- Assays for molecules that do not exist
- Negative controls

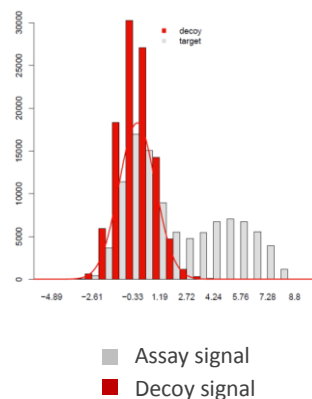

### 3) Analyte Identification

Method – Comparison to discovery proteomics

- Can be applied to DIA, MRM and PRM
- Comparison to shotgun proteomics
  - Identical goal to estimate a Qvalue/FDR
  - Distinct method
    - $FDR = PSM_{\text{decoy}}/PSM_{\text{target}}$  does not work

### 3) Analyte Identification

*Method – Use*

#### Qvalues

- Always calculated
- Especially useful for
  - Label free
  - DIA and large MRM/PRM data sets
- Combined with manual data review in small MRM/PRM data sets
  - i.e. dilution series

### 3) Analyte Identification

*Method – Cons*

- Decoys have to be available
- Decoys have to be representative
- Parameterization of decoy distribution
- Cutting away the left tail of the target distribution
- Does not solve issue to get complete quantification matrices

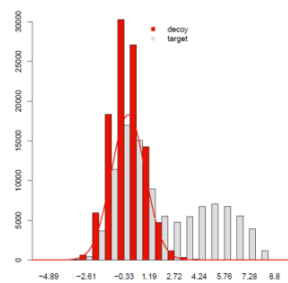

### 3) Analyte Identification

#### *Method – Pros*

- Large data sets (DIA)
- Why helpful in case internal standards are available?
  - Detection of internal standard signal
  - If LOD is missing
  - Can be hard to determine a “real” LOD
    - Matrix just missing the endogenous analyte required, pure light and heavy analyte, one of the two with known absolute quantity needed
    - Variability of sample matrix (e.g. human blood)
  - Transferability to other laboratories, machines,...

### 4) Analyte Quantification

- Explain your method of quantification, how many transitions you monitor and which ones are chosen to quantify.
- If you are using internal standards describe in detail how they are used.
- If you are not using internal standards, explain how you are quantifying.
- Discuss the capabilities and limitations of your approach.

## 4) Analyte Quantification

*MRM*

Identifications in MRM (n=591)

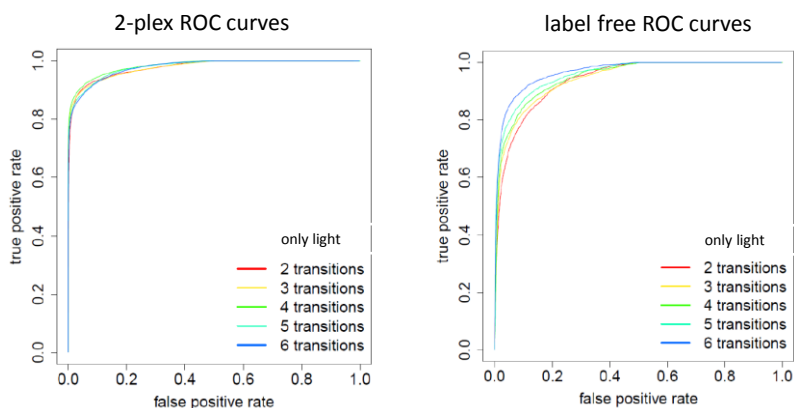

**BIOGNOSYS**  
PROTEOMICS - NEXT GENERATION

Reiter et al. NM 2011

19

## 4) Analyte Quantification

*MRM/PRM*

- Transitions with highest response
- Transitions with interferences removed
- 1-plex
  - ~5 transitions
  - Relative quantification
- 2-plex
  - ~3 transitions (total 6)
  - Relative and absolute quantification
- Sum of peak areas (or peak heights) for an analyte

**BIOGNOSYS**  
PROTEOMICS - NEXT GENERATION

20

## 4) Analyte Quantification

*MRM/PRM – Internal standards*

- Same number of transitions monitored for endogenous as for internal standard
- S/N of internal standard ~500
- Sum of transition areas for endogenous and internal standard
- Ratio of sums endogenous to internal standard

## 4) Analyte Quantification

*DIA – Label free*

- ~6-10 most responsive fragment ions
- Sums of peak areas (or peak heights)
- Normalization
- Relative quantification



## 4) Analyte Quantification

### *Capabilities and limitations*

#### **“Quantify the analyte in the MS sample vial”**

- Absolute analyte quantification with internal standard
  - Losses of internal standard (absorption,...)
- Relative quantification with internal standard
  - Variation of ion spray, MS sensitivity etc. can be balanced out
- Label free relative quantification
  - Experiment design and normalization
- Carry over should be considered for experiments where this can be an issue

## 5) Standard Curves

- If you generate standard curves (calibration or response curve), explain how you use them to assess the quantitative accuracy of the assay.
- Are the slope and y-intercept from the curve regression used in calculating the analyte concentration in a sample?
- Is an external calibration curve used?

## 5) Standard Curves

### Handling and Use

- Exponential dilution (n=3)
- Calibration curves
  - LOD/LOQ (absolute or relative)
  - CV in linear range
  - Specification sheet
  - Quality control
- Accuracy difficult to determine (->ELISA)
- Precision estimated based on CVs in linear range
- Calibration curves not used to determine analyte concentration

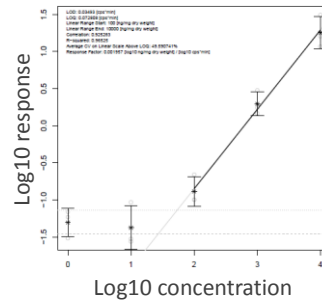

## 6) Protein Quantitation Using Peptides

- Can you provide a useful estimate or accurately determine the amount of protein in the matrix based on the measured levels of peptides?
- Explain how/why.
- Indicate experimental parameters such as number of peptides per protein and the criteria/computational tools applied.
- If you have multiple peptides from the same protein and each gives a different answer for the extrapolated protein level, how do you deal with this?

## 6) Protein Quantitation Using Peptides

### Challenges

#### Challenges for absolute quantitation with internal standard

- Determination of amount of starting material
  - e.g cell volume, number of cells, total protein
- Recovery of protein from sample preparation protocol
- Protein digest
- Protein modifications
- Proteotypicity of peptides (specific to protein or gene)
- Losses of internal standard

## 6) Protein Quantitation Using Peptides

### Measures

- Repeat digest and sample preparation and monitor variance
- Multiple peptides per protein
  - DIA: 5 to as many as possible peptides per protein
  - MRM: start with 3-5 peptides per protein, scheduling
- Consider proteotypicity
- Consistency
  - DIA: average
  - MRM: Select most stable peptides
- Recombinant protein
  - Modifications (glycosylation), fold,...?

## 7) Interferences

Describe methods you use to establish presence of interferences and how you deal with them if detected.

## 7) Interferences

- Manual detection and removal
- Automatic refinement with interference score\*
  - Based on shape correlations

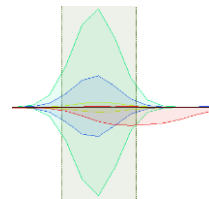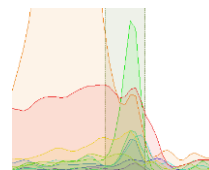

## 8) Ion suppression

How do you account for suppression of ionization in your quantification method?

## 8) Ion suppression

*Label free*

- Stable spray conditions
- Blocking and randomization of acquisition sequence
- Normalization\*
  - Account for time drifts in ionization affecting all/most eluting peptides
  - Central tendency
  - Local regression
- Use several peptides per protein

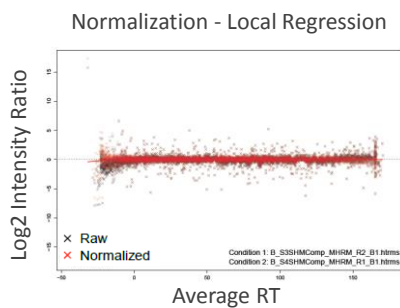

## 9) Assay Quality Control

How do you “qualify” your measurements/assays, i.e., what criteria do you use or think appropriate to say that your measurements/assays has been successfully developed?

## 9) Assay Quality Control

- Protein relative response factor
- Proteotypicity for protein or gene
- Accurate iRT (indexed retention time of apex)
- Most responsive fragment ions and relative intensities (no interferences)
- Low sample preparation variance
- Label free
  - Detectability (Qvalue)
- Absolute quantification with internal standards
  - LOD/LOQ
  - Linear range

## 10) Software

What software and analytical tools do you use in your studies and why?

## 10) Software

MRM/PRM

### SpectroDive

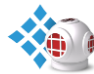

- Biognosys internal software
- Scheduling with iRT
- Automated parameter calibration
- Scoring and Qvalues
- Profiling across runs
- Automated assay refinement and panel versioning

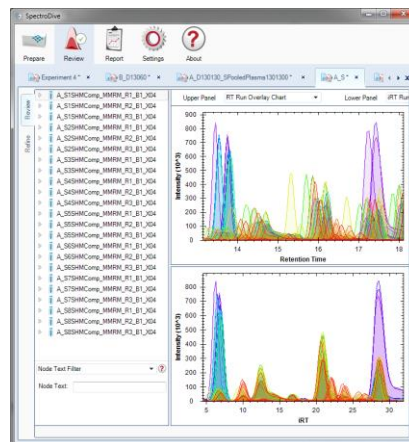

## 10) Software

DIA

### Spectronaut

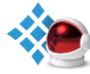

- Biognosys software
- Automated parameter calibration
- Fast and low memory requirements
- Scoring and Qvalues
- Profiling across runs
- Targeted data extraction with iRT

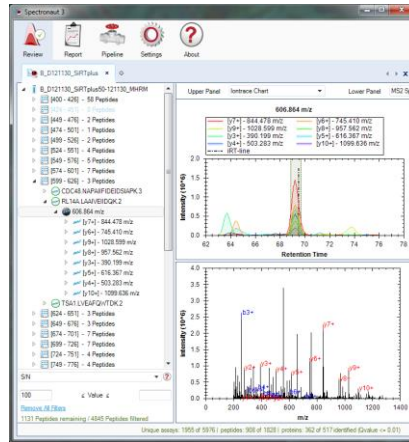

**BIOGNOSYS**  
PROTEOMICS - NEXT GENERATION

37

## 11) Information for Publication

What information do authors need to provide in their manuscripts/supplement to enable reviewers and readers to understand what was done and to be able to judge the confidence of the measurements made?

**BIOGNOSYS**  
PROTEOMICS - NEXT GENERATION

38



## 11) Information for Publication

- Algorithm/software version and parameters
- Acquisition sequence (randomization/blocking)
- Identification criteria
  - Algorithm description
  - Criteria for manual peak identification/integration
- Normalization
- Proteotypicity of peptides
- Transitions per peptide
- Peptides per protein
- Discussion of known challenges regarding absolute quantification

## Targeted Peptide Measurements in Biology and Medicine: Best Practices for Assay Development

### Software for Data Acquisition and Databasing

Eric Deutsch

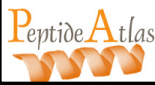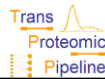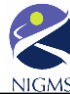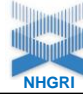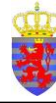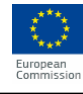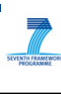

## Overview of PeptideAtlas Project Components

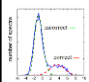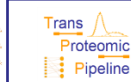

Complete software suite  
of tools for processing  
MS/MS data

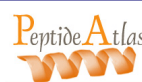

Compendium of  
results from uniform  
processing of many  
MS/MS datasets

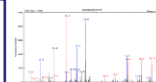

SRMAtlas

Compendium of ranked  
peptides and transitions  
for all proteins in select  
proteomes

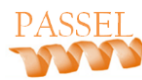

Repository for  
submitted SRM  
experimental datasets  
and results

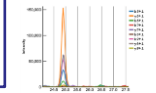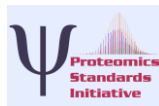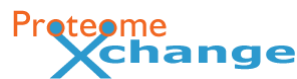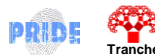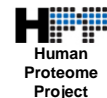

## PeptideAtlas SRM Experiment Library (PASSEL)

Data repository specifically designed for SRM experimental results

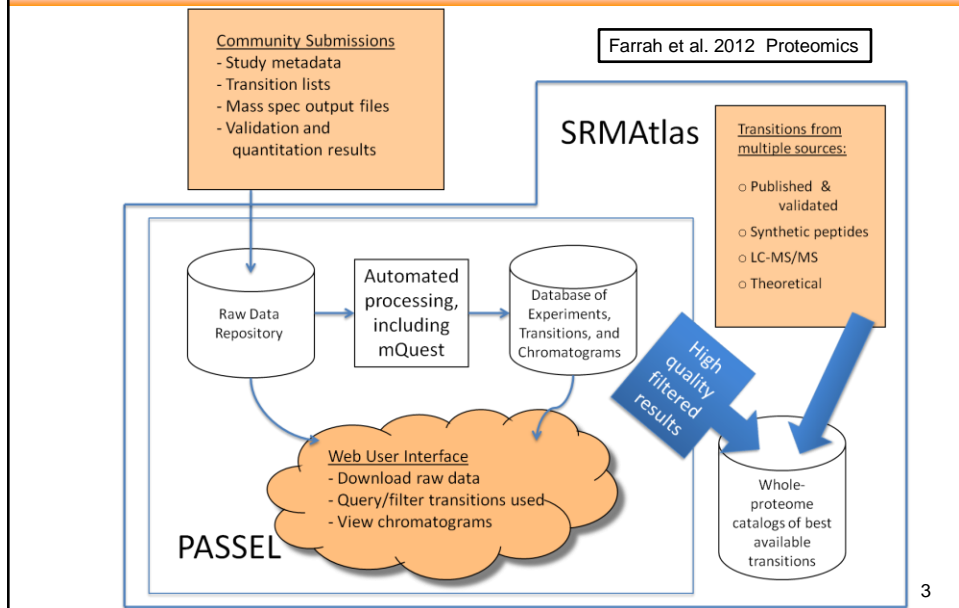

## Q/A: Goals, Customers

What are the goals of your targeted MS experiments or software? Who are the “customers” or likely users of the methods and results?

- Develop software and resources to facilitate design and accessibility of SRM experiments
  - SRMatlas catalogs best-available information on potential assays
  - PASSEL stores resulting experimental data
  - Experimental results feed back into SRMatlas

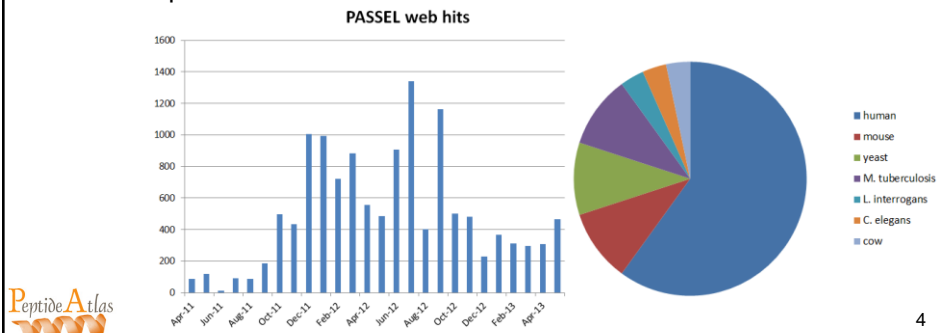

## Q/A: Analyte Plex Level

What range of analyte plex-level per injection do you typically use in your experiments?

- PASSEL current has 20 public experiments. 3 about to be released.
- Another 5 that are under review and thus still private
- 2163 total SRM runs
- 592709 total (redundant) Q1/Q3 pairs measured

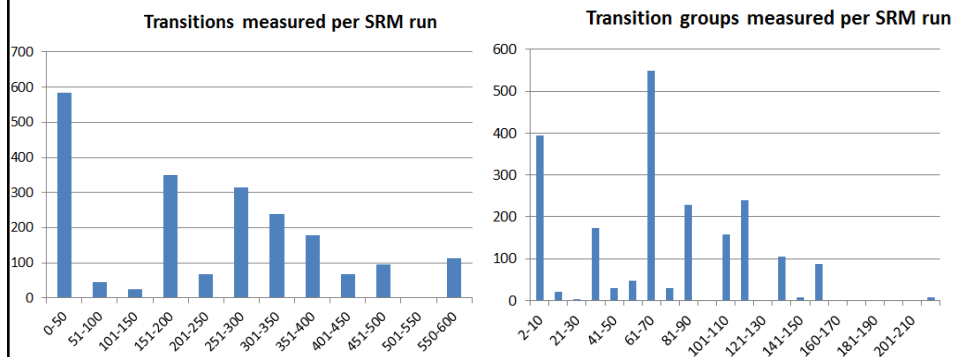

## Q/A: ID confidence

Explain how you establish confidence that what is being measured is the analyte of interest (e.g., match to spectra of an internal standards, match to reference spectra from discovery experiments, RT, etc.). How do these methods differ from "Discovery Proteomics" using data-dependent or data-independent experiments?

- PASSEL processing pipeline is still an evolving process
- Currently uses mQuest and mProphet for statistical analysis
- mProphet scores are loaded into PASSEL for viewing when possible
- Requires decoy transitions
- This pipeline is similar to the PeptideAtlas – shotgun pipeline, which uses decoy and model-based confidence metrics

# PASSEL Transition Browser

Works best under Firefox.

Get SRM Experiment Transitions

Form Resultset ChromaVis Plot

show column descriptions

| Modified Peptide Sequence | Z | Peptide<br>Side<br>Atlas | Light<br>Chromatogram | Max<br>Peak<br>Left |
|---------------------------|---|--------------------------|-----------------------|---------------------|
| AAATGTFIFR                | 2 |                          |                       |                     |
| AADITVERFASGK             | 2 |                          |                       |                     |
| AALLTSWK                  | 2 |                          |                       |                     |
| AALSAPSNFR                | 2 |                          |                       |                     |
| AAPFEASTLAITEPER          | 2 |                          |                       |                     |
| AAGEQVLNASR               | 2 |                          |                       |                     |
| AASDIAMTELPPTHIR          | 2 |                          |                       |                     |
| AASGFNAMEAQTLR            | 2 |                          |                       |                     |
| AATVGSILAGQPIER           | 2 |                          |                       |                     |
| AAVATLGSVGVFEETPK         | 2 |                          |                       |                     |
| AAVPSGASTGVYALFLR         | 2 |                          |                       |                     |
| AALHVDGQEALESRLR          | 3 |                          |                       |                     |
| AADGRPEPQVTK              | 2 |                          |                       |                     |
| AADGDEELVYHPK             | 3 |                          |                       |                     |
| AADFDGYNPHPTIK            | 2 |                          |                       |                     |
| AEDFDGYNPHPTIK            | 2 |                          |                       |                     |
| AEDMLDIR                  | 2 |                          |                       |                     |
| AELKMSRTP                 | 3 |                          |                       |                     |

**SPEVLLGSAR (1027.5662 Daltons) +2, light**  
 Experiment: ATAGS T-47D cell line  
 Spectrum file: 4Q20100303uk\_seltb\_ATAGS\_40f\_1-s1.m2mML  
 Chromatogram\_id: 63917

6541 514.760 / 626.290  
 6541 514.760 / 619.290  
 6541 514.760 / 639.370  
 6741 514.760 / 699.260  
 7741 514.760 / 715.460  
 8541 514.760 / 793.400  
 9541 514.760 / 844.460  
 9541 514.760 / 854.460  
 9541 514.760 / 841.546

**SPEVLLGSAR (1027.5662 Daltons) +2, heavy**  
 Experiment: ATAGS T-47D cell line  
 Spectrum file: 4Q20100303uk\_seltb\_ATAGS\_40f\_1-s1.m2mML  
 Chromatogram\_id: 63916

6541 519.761 / 626.290  
 6541 519.761 / 626.290  
 6541 519.761 / 639.372  
 6741 519.761 / 699.260  
 7741 519.761 / 725.447  
 8541 519.761 / 793.425  
 9541 519.761 / 854.462  
 9541 519.761 / 854.469  
 9541 519.761 / 851.542

Auto Scale Y Axis  
 Max Y Value:

7

## Q/A: Quantification

Explain your method of quantification, how many transitions you monitor and which ones are chosen to quantify. If you are using internal standards describe in detail how they are used. If you are not using internal standards, explain how you are quantifying. Discuss the capabilities and limitations of your approach.

- Goal of PASSEL is not to reproduce/automatically derive quantification
- Goal of PASSEL is to disseminate experimental data along with uniformly derived identification confidence for reuse in assay development and experimental design

Transitions per peptide

8

## Q/A: Calibration Curves

If you generate standard curves (calibration or response curve), explain how you use them to assess the quantitative accuracy of the assay (e.g., are the slope and y-intercept from the curve regression used in calculating the analyte concentration in a sample? Is an external calibration curve used?)

- A new component of SRMAtlas: SRMQuantAtlas
- Assesses peptides and transitions suitability via calibration curves
- Initially human peptides in simple mixture, plasma, urine matrix

## Quantitative SRM Assay Development

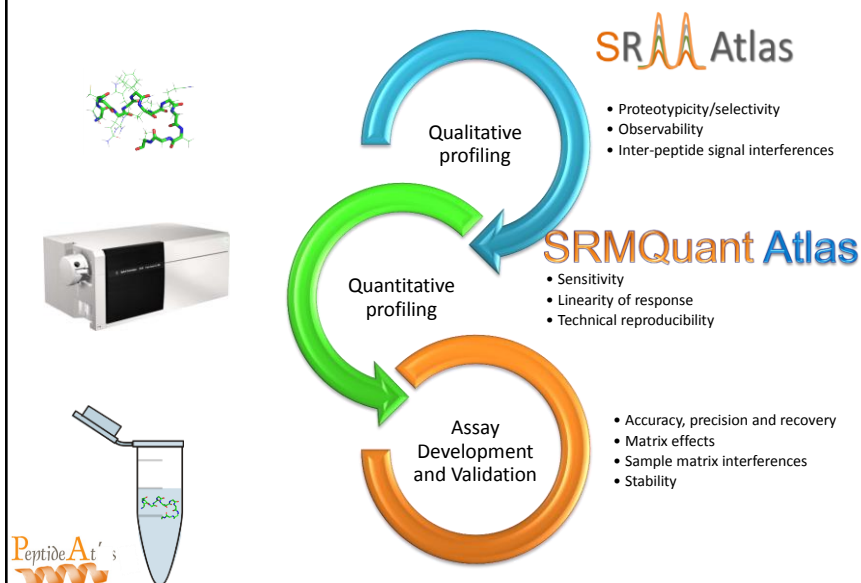

# SRMQuantAtlas Workflow

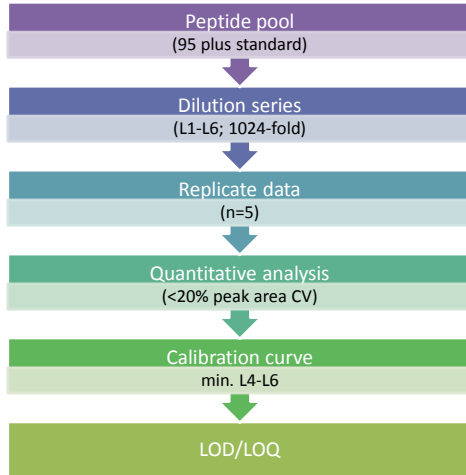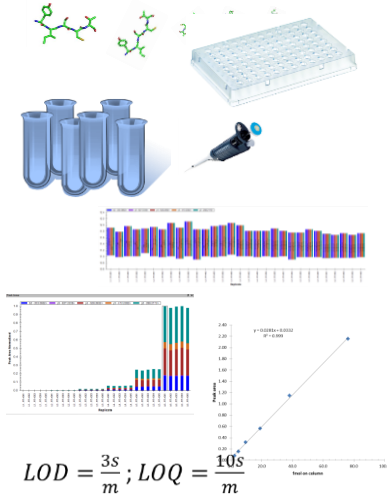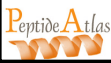

# SRMQuantAtlas Interface

Search All Builds Current Build Queries SRMAtlas PTPAtlas Submission

show row descriptions

Quantitation information

|                  |            |
|------------------|------------|
| Peptide Sequence | FMIDPHAIR  |
| Precursor m/z    | 372.056    |
| Titration range  | 0.18-179.3 |
| R-squared value  | 0.9995     |
| LOD              | 0.06       |
| LOQ              | 0.20       |
| Linear range     | 0.20-179.3 |
| Fold change      | 24.0       |
| Is quantitative  | Yes        |
| Content-type     | text/html  |

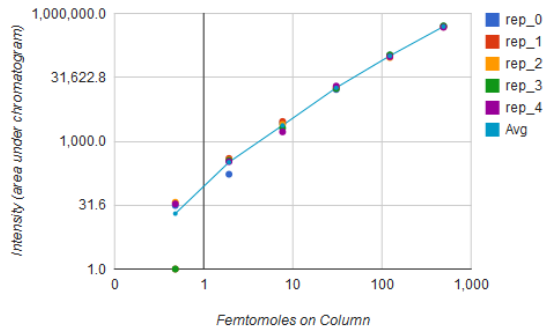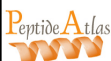

## Q/A: Protein Abundance

Can you provide a useful estimate or accurately determine the amount of protein in the matrix based on the measured levels of peptides? Explain how/why. Indicate experimental parameters such as number of peptides per protein and the criteria/computational tools applied. If you have multiple peptides from the same protein and each gives a different answer for the extrapolated protein level, how do you deal with this?

- Not currently within scope of PASSEL

## Q/A: Interferences

Describe methods you use to establish presence of interferences and how you deal with them if detected.

- Interference taken in account in mProphet modeling for ID confidence calculation, but otherwise no PASSEL metric for interference severity



## Q/A: Ion Suppression

How do you account for suppression of ionization in your quantification method?

- Note in scope of PASSEL

## Q/A: Assay Qualification

How do you “qualify” your measurements/assays, i.e., what criteria do you use or think appropriate to say that your measurements/assays has been successfully developed?

- My opinion:
- All measurements should be qualified with a probability that the measured peak group is indeed the intended analyte
- Threshold can be authors’ choice
- Quantitative measurements should have associated uncertainties
  - CVs are nice
  - But how about a real uncertainty:  $\pm n.nn$ 
    - Relative to other measurements
    - Absolute if appropriate
    - Maybe still to hard. Need better software.

## Q/A: Software

What software and analytical tools do you use in your studies and why?

- mProphet toolset
- Skyline
- Vendor software
  
- SRMAtlas & related in-house tools
- SRMQuantAtlas & related in-house tools

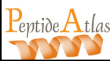

17

## Q/A: Metadata Dissemination

What information do authors need to provide in their manuscripts/ supplement to enable reviewers and readers to understand what was done and to be able to judge the confidence of the measurements made?

- Currently PASSEL has rather modest requirement to encourage use:
  - Mass spec output files (vendor format or mzML)
  - Transition lists (TraML or whatever)
  - Basic metadata in a submission form (basic for now)
  - Analysis results in whatever format (not currently used, but available for download)
  
- **MIAPE – Quant** is a PSI Minimum Information specification for all quantitative study data, including SRM
- **TraML** is a PSI data format for encoding SRM transitions
- **mzQuantML** is a PSI data format for all quantitative study data, including SRM
- **mzTab** is a PSI format under development for simplified quant data

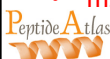

18

## MIAPE – Quant

- MIAPE = Minimum Information About a Proteomics Experiment
- Set of minimum information elements for the quantitative aspect of a proteomics experiment
- Complements MIAPE – MS + MIAPE – MSI
  
- Submitted through the PSI document process
- Explicitly sought input from:
  - Data metrics workshop participants
  - HUPO New Technologies Initiative members
  - Journal editors
  
- Published: Martínez-Bartolomé, S., Deutsch, E. W., et al. 2013, Journal of Proteomics, S1874-3919, 102-4

19

1. General features:
  - 1.1. Experiment identifier or name
  - 1.2. Date stamp
  - 1.3. Responsible person or role
  - 1.4. Associated MIAPE documents
  - 1.5. Quantitative approach
2. Experimental design and sample description:
  - 2.1. Experimental design
    - 2.1.1. Groups
    - 2.1.2. Biological and technical replicates
  - 2.2. Sample description
    - 2.2.1. Labelling protocol
    - 2.2.2. for each sample:
      - 2.2.2.1. Sample name
      - 2.2.2.2. Sample labelling with reporting ion mass, reagent or isotope labelled amino acid
      - 2.2.2.3. Replicate and/or group
    - 2.2.3. Isotopic corrections
  - 2.3. Internal references
3. Input data:
  - 3.1. Input data type
  - 3.2. Input data format
  - 3.3. Availability of the input data
4. Protocol:
  - 4.1. Quantification software
    - 4.1.1. Software name and version
    - 4.1.2. Parameters used for the quantitative process
  - 4.2. Confidence filter of features prior to quantification
  - 4.3. Description of the method of the quantitative values calculation for each feature
  - 4.4. Combination of quantification values
  - 4.5. Calibration curves of standards
5. Resulting data:
  - 5.1. Quantification values at peptide level:
    - 5.1.1. Quantification values
    - 5.1.2. Statistical values associated with the quantification value
  - 5.2. Quantification values at protein level:
    - 5.2.1. Quantification values
    - 5.2.2. Statistical values associated with the quantification value

20

## Unifying exchange of transitions with TraML

- PSI's TraML (Transitions Markup Language) (similar to mzML et al.)
- Format for encoding SRM transitions
- Version 1.0.0 now finalized and published in MCP

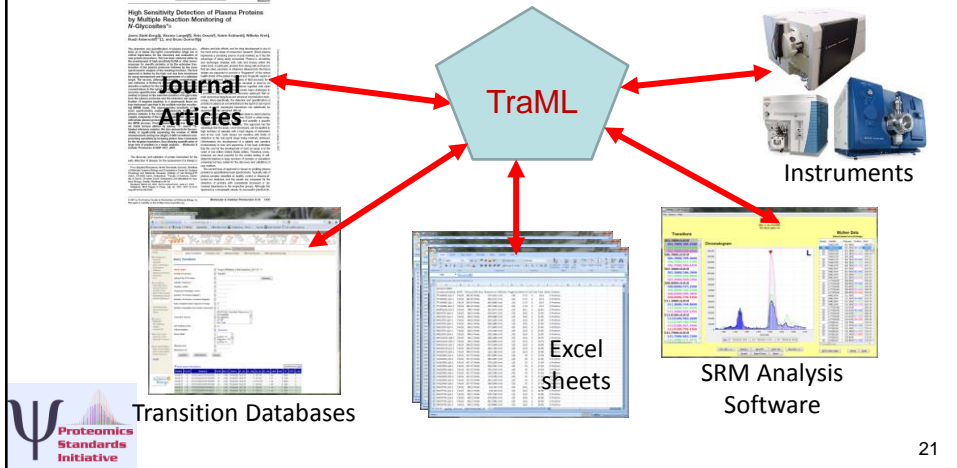

21

## mzQuantML - for encoding the quantitative aspects of MS1, MS2, SRM, etc. experiments

Waltzer et al. 2013, MCP, in press

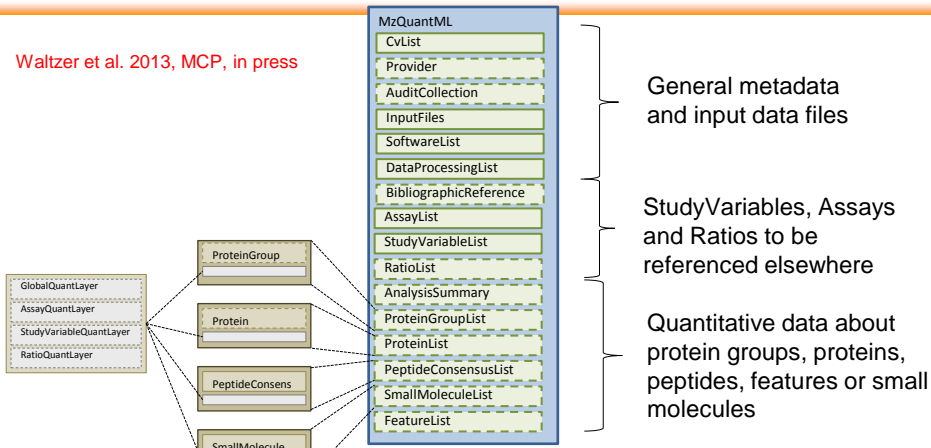

### Important features:

- Captures evidence trail from quantitative values about: protein group → protein → peptide → features on 2D LC-MS maps
- Currently this evidence trail is lost in almost all workflows
- Without this, very difficult to visualise each step of the analysis workflow

22

## mzTab - Aims

- To provide a lightweight format for exchanging proteomics data
  - Simple summary report of the experimental results
  - Peptides identified in a given experimental setting
  - Reported quantification values
  - Metadata
  - Not 'direct' support for technical/biological replicates
- Easy to use by the proteomics community, systems biologists as well as providers of knowledge bases
- It can be used by non-experts in bioinformatics

23

## mzTab – current draft

- What the format does NOT aim to do:
  - Replace mzIdentML or mzQuantML
  - Contain the complete data of a MS proteomics experiment
  - Provide detailed evidence for the data
  - Allow a researcher to recreate the process which led to the results
  - Be requirements conforming (MIAPE, journal guidelines, etc.)
  - In short: be complete in any way
- But does provide a standardized format for users who are going to transform mzIdentML, mzQuantML into TSV anyway
- Currently in the PSI document process

24

# ProteomeXchange Consortium

- **Goal:** Sharing proteomics data between main existing proteomics repositories.
- Includes PeptideAtlas and PRIDE, with data sharing infrastructure to be provided at the EBI and ISB.
- ProteomeXchange is primarily **user-oriented**: the idea is to provide a **single point of submission**, but **multiple points of data visualization and analysis**.
- Since January 2011, supported by the European Commission (FP7 framework). SIB (UniProt) also involved in the grant.

Proteome  
Xchange

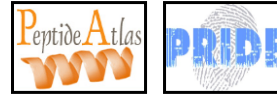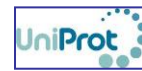

<http://www.proteomexchange.org>



25

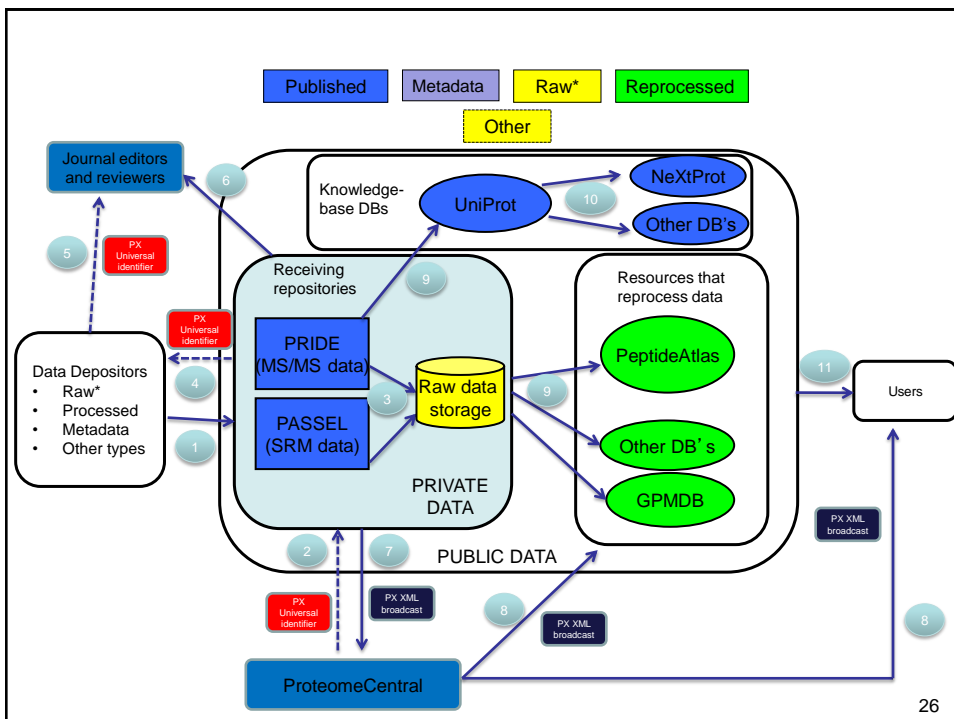

26

## Overview of PeptideAtlas Project Components

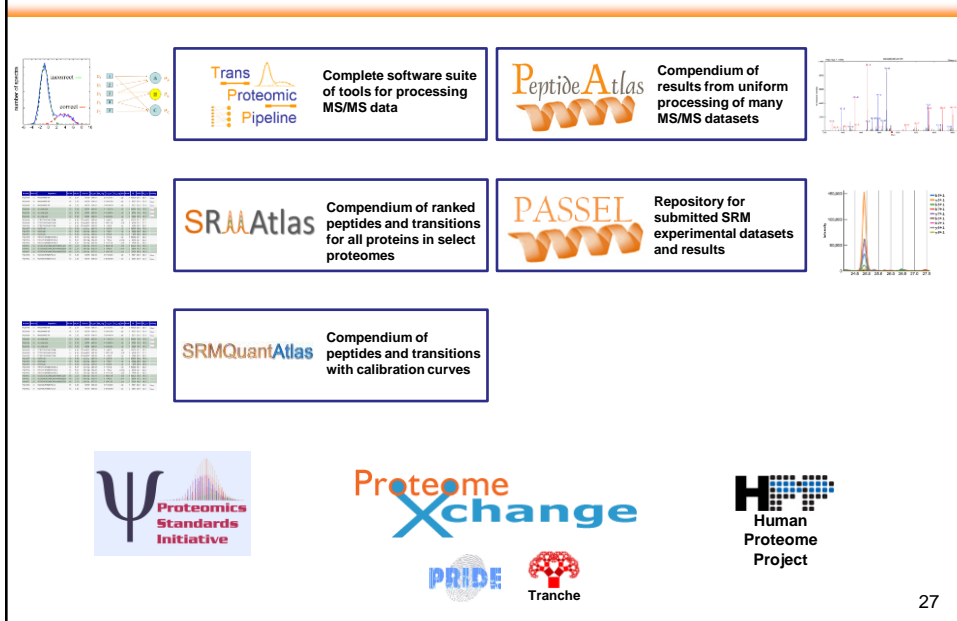

27

Thank you!

Questions?

28

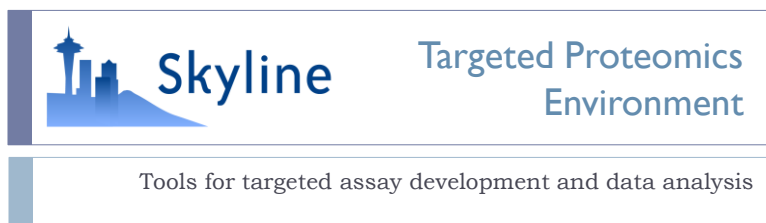

Brendan MacLean  
MacCoss Lab

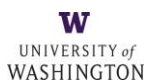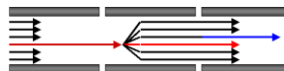

## Chromatography-based Quantification

- ▶ SRM
  - ▶ MSI chromatogram extraction
  - ▶ Targeted MS/MS
  - ▶ Data independent acquisition (DIA/SWATH)
- 
- ▶ 1000+ registered users, 4500+ instances each week
  - ▶ Supporting 5 instrument vendors, 4 funding development
  - ▶ Supporting 15 peptide search engines, 4 library formats
  - ▶ Free and open source (Apache 2.0)

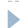



## Aggregating and Publishing

- ▶ Publish fully annotated Skyline documents
- ▶ Build chromatogram libraries
- ▶ Aggregate lab QC data (future)
- ▶ Free hosted version (<http://panoramaweb.org>)
  - ▶ 23 separate projects so far (CPTAC and ABRF sPRG)
  - ▶ User controlled security
- ▶ Locally installable server application
- ▶ Free and open source (Apache 2.0)

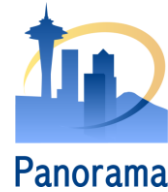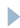

## Skyline Use

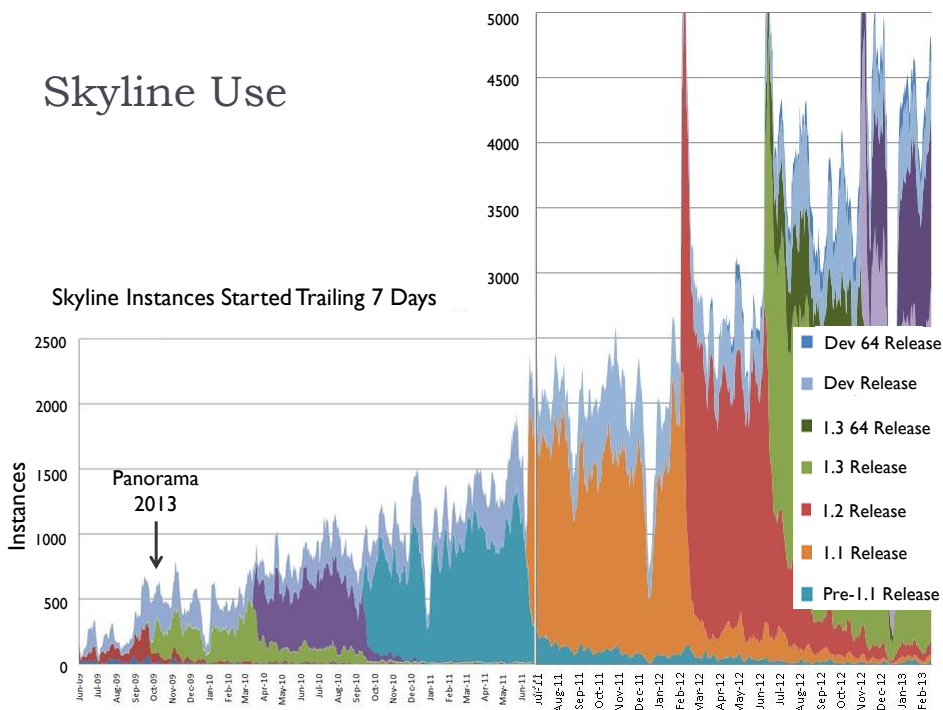

## Analyte Plex Level

---

- ▶ **Pushing vendor limits**
    - ▶ >320 transitions on Thermo
    - ▶ >1000 transitions on AB SCIEX
    - ▶ >256 light-heavy precursor pairs on Waters
  
  - ▶ **Vendors pushing the limits with Skyline**
    - ▶ Agilent and AB SCIEX triggered MRM
    - ▶ Thermo iSRM
    - ▶ Agilent, AB SCIEX and Thermo scheduled targeted MS/MS
    - ▶ DIA/SWATH
- 

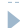

## Prior Knowledge and Consistency

---

- ▶ Powerful enough to be used cross-lab / cross experiment
  - ▶ More powerful run-to-run
  
  - ▶ Relative ion abundance
    - ▶ Spectral and chromatogram libraries
  - ▶ Retention time
    - ▶ iRT
  
  - ▶ Does ensuring comparable measurements require ID?
- 



# Haptoglobin

LQTEGDGIYTLNSEK

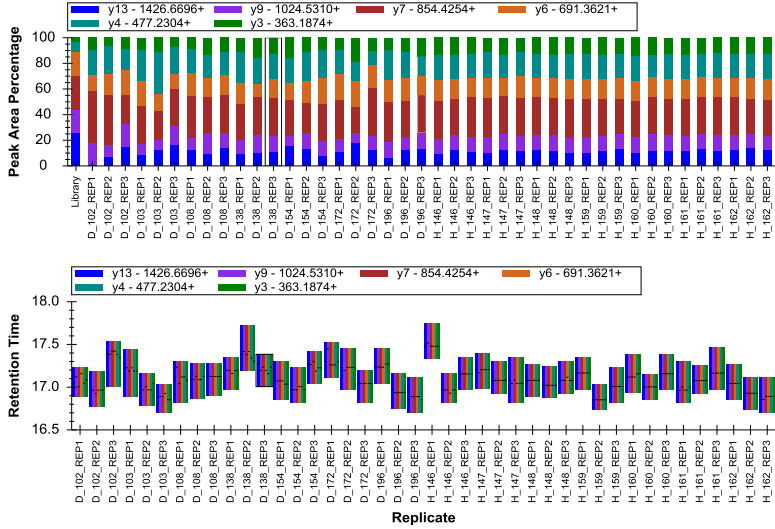

# Haptoglobin

LQTEGDGIYTLNSEK

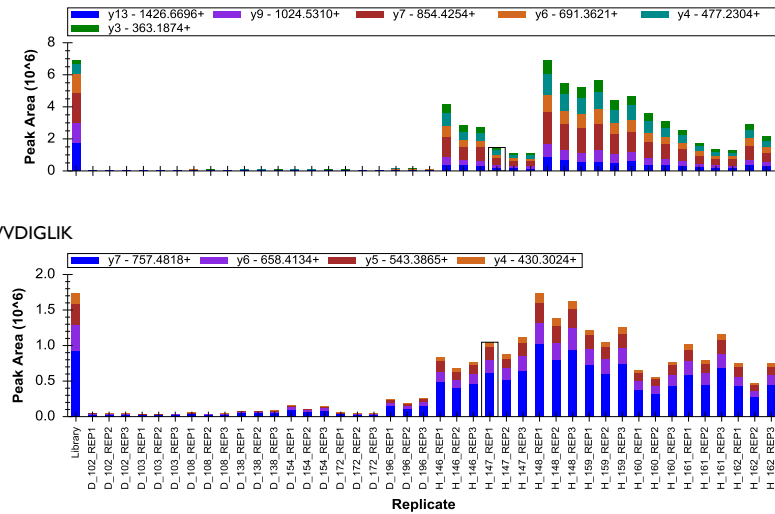

# Mitochondrial 39S ribosomal protein L9

CSSLWAGAAWLR

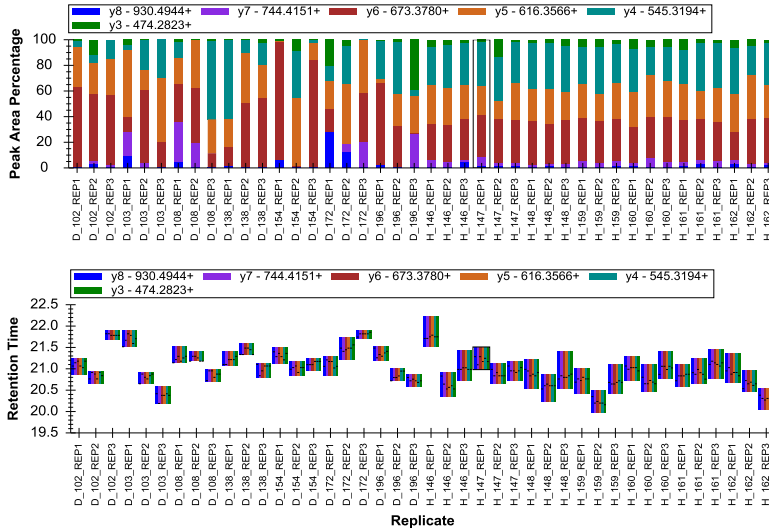

# Mitochondrial 39S ribosomal protein L9

CSSLWAGAAWLR

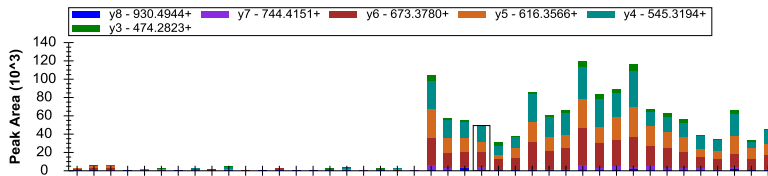

SWVDIGLIK

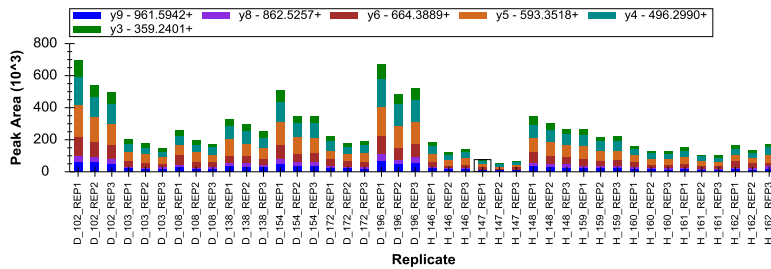

# CSSLWAGAWLR

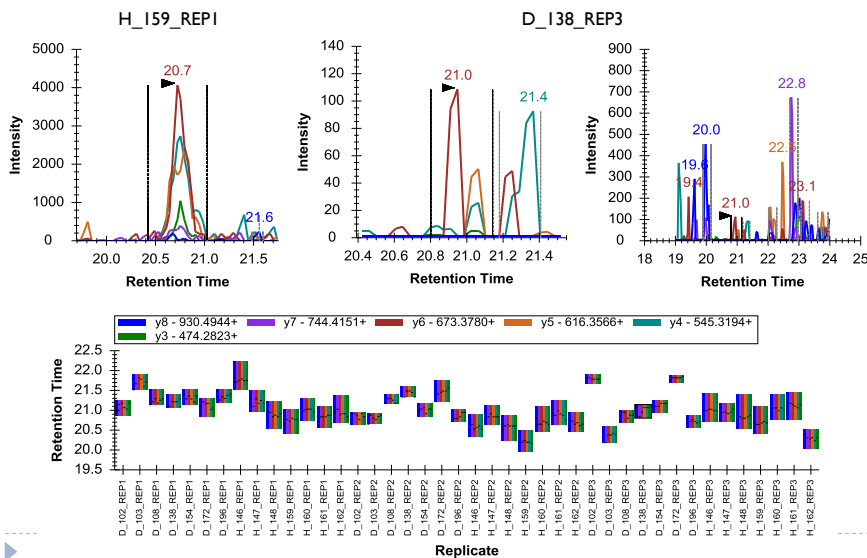

# Truncated and Missing Peaks

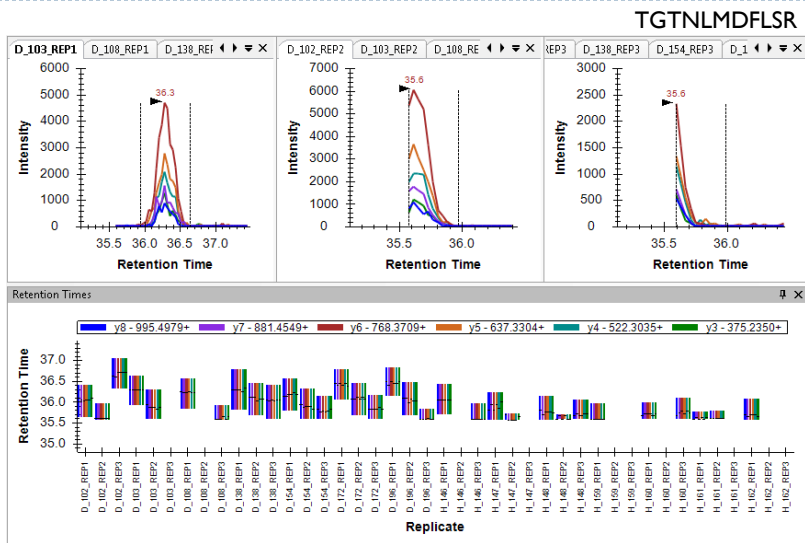

# Deciphering the Unexpected

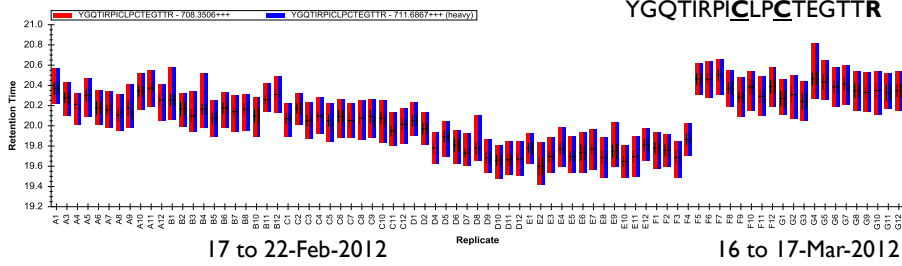

| Replicate Name | Acquired Time         | Peptide Peak Found Ratio | Peptide Retention Time | Ratio To Standard | BioReplicate | Run | Condition |
|----------------|-----------------------|--------------------------|------------------------|-------------------|--------------|-----|-----------|
| F2             | 2/21/2012 9:02:23 PM  | 0.83                     | 19.46                  | 0.7895            | 59           | 59  | Disease   |
| F3             | 2/21/2012 10:15:23 PM | 0.83                     | 19.39                  | 1.1252            | 60           | 60  | Disease   |
| F4             | 2/22/2012 12:41:17 AM | 1                        | 19.66                  | 1.2937            | 61           | 61  | Disease   |
| F5             | 3/16/2012 6:47:27 AM  | 1                        | 20.13                  | 1.2389            | 62           | 62  | Healthy   |
| F6             | 3/16/2012 8:00:25 AM  | 1                        | 20.18                  | 0.9268            | 63           | 63  | Healthy   |
| F7             | 3/16/2012 9:13:23 AM  | 1                        | 20.17                  | 1.3614            | 64           | 64  | Healthy   |

# Aligned by iRT

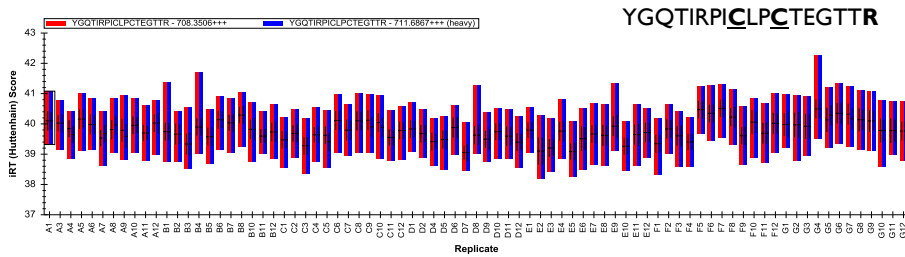

# Global Normalization Problem

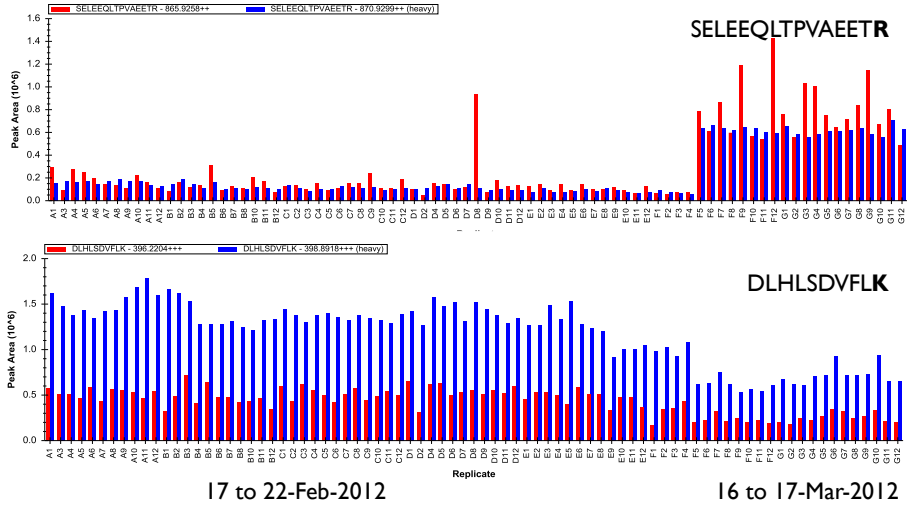

# Normalization by Reference Standard

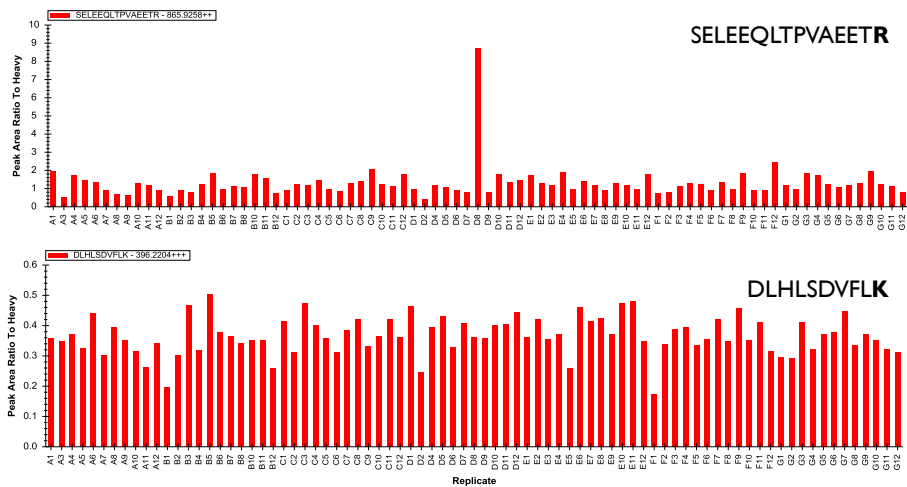

## Custom Reports

| ProteinName | PeptideSequence | Precurs | Frag | Prodi | IsotopeLa | Condition | Bio | Run   | Area  |
|-------------|-----------------|---------|------|-------|-----------|-----------|-----|-------|-------|
| NP_036629   | CSLPRPWALTFYSGR | 2       | y10  | 1     | light     | Disease   | 1   | 1     | 14516 |
| NP_036629   | CSLPRPWALTFYSGR | 2       | y10  | 1     | light     | Disease   | 1   | 15    | 9607  |
| NP_036629   | CSLPRPWALTFYSGR | 2       | y10  | 1     | light     | Disease   | 1   | 29    | 7480  |
| NP_036629   | CSLPRPWALTFYSGR | 2       | y10  | 1     | light     | Disease   | 2   | 2     | 5692  |
| NP_036629   | CSLPRPWALTFYSGR | 2       | y10  | 1     | light     | Disease   | 2   | 16    | 5953  |
| NP_036629   | CSLPRPWALTFYSGR | 2       | y10  | 1     | light     | Disease   | 2   | 30    | 649   |
| FSYGR       | 2               | y10     | 1    | light | Disease   | 3         | 3   | 10476 |       |
| FSYGR       | 2               | y10     | 1    | light | Disease   | 3         | 17  | 3952  |       |
| FSYGR       | 2               | y10     | 1    | light | Disease   | 3         | 31  | 3165  |       |
| FSYGR       | 2               | y10     | 1    | light | Disease   | 4         | 4   | 9830  |       |
| FSYGR       | 2               | y10     | 1    | light | Disease   | 4         | 18  | 10671 |       |
| FSYGR       | 2               | y10     | 1    | light | Disease   | 4         | 32  | 6369  |       |
| FSYGR       | 2               | y10     | 1    | light | Disease   | 5         | 5   | 15037 |       |
| FSYGR       | 2               | y10     | 1    | light | Disease   | 5         | 19  | 9128  |       |
| FSYGR       | 2               | y10     | 1    | light | Disease   | 5         | 33  | 6918  |       |
| FSYGR       | 2               | y10     | 1    | light | Disease   | 6         | 6   | 11991 |       |
| FSYGR       | 2               | y10     | 1    | light | Disease   | 6         | 20  | 8630  |       |
| FSYGR       | 2               | y10     | 1    | light | Disease   | 6         | 34  | 6896  |       |
| FSYGR       | 2               | y10     | 1    | light | Disease   | 7         | 7   | 13061 |       |
| FSYGR       | 2               | y10     | 1    | light | Disease   | 7         | 21  | 12258 |       |
| FSYGR       | 2               | y10     | 1    | light | Disease   | 7         | 35  | 9037  |       |
| FSYGR       | 2               | y10     | 1    | light | Healthy   | 8         | 8   | 7891  |       |
| FSYGR       | 2               | y10     | 1    | light | Healthy   | 8         | 22  | 3362  |       |
| FSYGR       | 2               | y10     | 1    | light | Healthy   | 8         | 36  | 4448  |       |

**Edit Report**

Report Name: MSstats2 Input Preview...

Peptides  
 Results  
    ProteinName  
    ProteinDescription  
    ProteinSequence  
    ProteinNote

Add >

ProteinName  
 PeptideSequence  
 PrecursorCharge  
 Fragmentation  
 ProductCharge  
 IsotopeLabelType  
 Condition  
 BioReplicate  
 Run  
 Area

Pivot Replicate Name     Pivot Isotope Label

OK Cancel

## Replicate Annotations

**Define Annotation**

Name:

Condition:

Type:

Values:  
Disease  
Healthy

Applies To:  
 Proteins  
 Peptides  
 Precursors  
 Transitions  
 Replicates  
 Precursor Results  
 Transition Results

**Annotation Settings**

Annotations are extra pieces of data which you can attach to elements in a Skyline document. Use this dialog to control which annotations are available in this document, as well as to define new annotations.

SubjectId  
 BioReplicate  
 Run  
 Condition  
 Concentration

Edit List...

OK Cancel

**Results Grid**

| Replicate Name | SubjectId | BioReplicate | Run | Condition |
|----------------|-----------|--------------|-----|-----------|
| D_172_REP1     | D172      | 6            | 6   | Disease   |
| D_172_REP2     | D172      | 6            | 20  | Disease   |
| D_172_REP3     | D172      | 6            | 34  | Disease   |
| D_196_REP1     | D196      | 7            | 7   | Disease   |
| D_196_REP2     | D196      | 7            | 21  | Disease   |
| D_196_REP3     | D196      | 7            | 35  | Disease   |
| H_146_REP1     | H146      | 8            | 8   | Healthy   |
| H_146_REP2     | H146      | 8            | 22  | Healthy   |
| H_146_REP3     | H146      | 8            | 36  | Healthy   |
|                |           | 9            | 9   | Healthy   |
|                |           | 9            | 23  | Healthy   |
|                |           | 9            | 37  | Healthy   |
|                |           | 10           | 10  | Healthy   |
|                |           | 10           | 24  | Healthy   |
|                |           | 10           | 38  | Healthy   |
|                |           | 11           | 11  | Healthy   |
|                |           | 11           | 25  | Healthy   |
|                |           | 11           | 29  | Healthy   |

Filter:



## External Tool MSstats

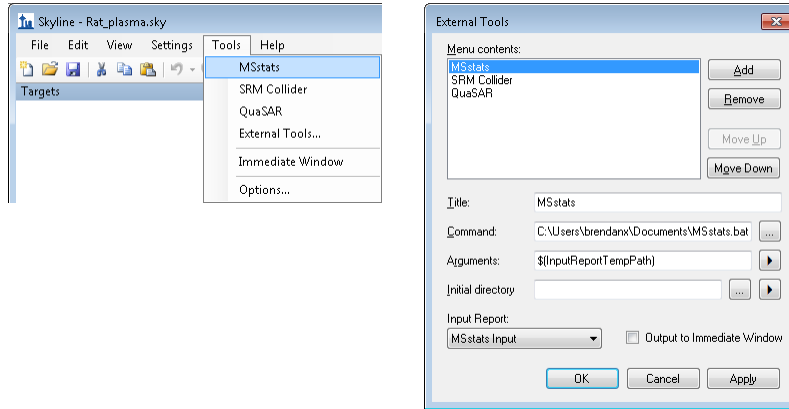

## Downstream Analysis with Statistical Tools

- ▶ Analysis of reports with R – MSstats

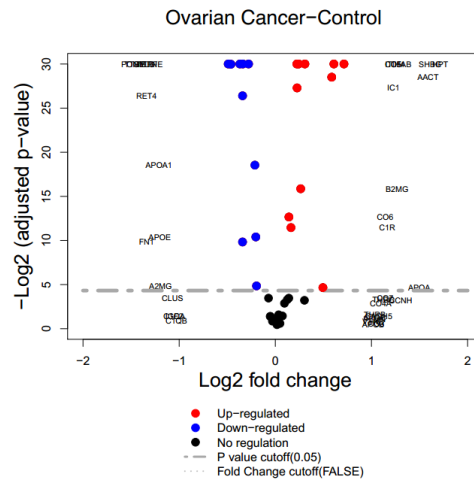

# Full Cycle – Reusing Targeted Results

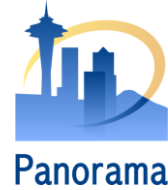

1. Create Folder
2. Users / Permissions
3. Configure Targeted MS Folder

## Configure Targeted MS Folder

- Experimental data** - a collection of published Skyline documents for various experimental designs
- Chromatogram library** - curated precursor and product ion expression data for use in designing and validating future experiments
  - Rank peptides within proteins by peak area

FINISH

## Publish to Panorama Library

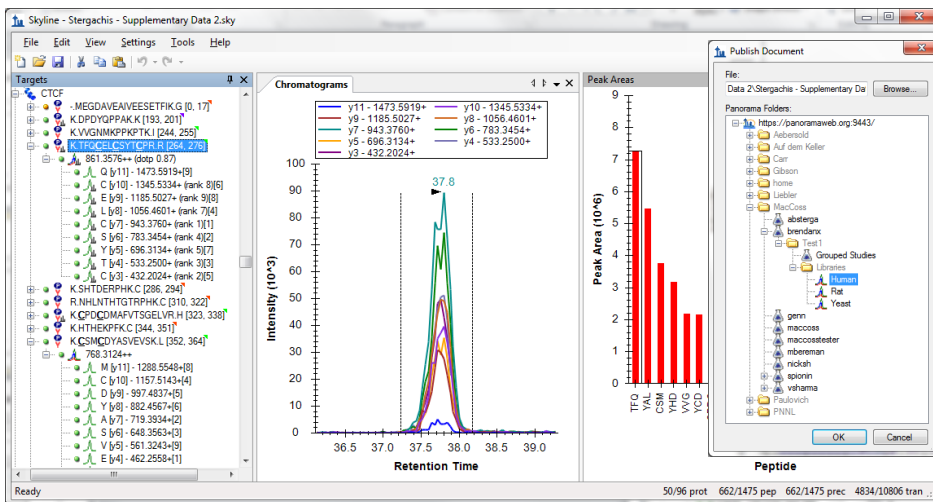

## Download from Panorama

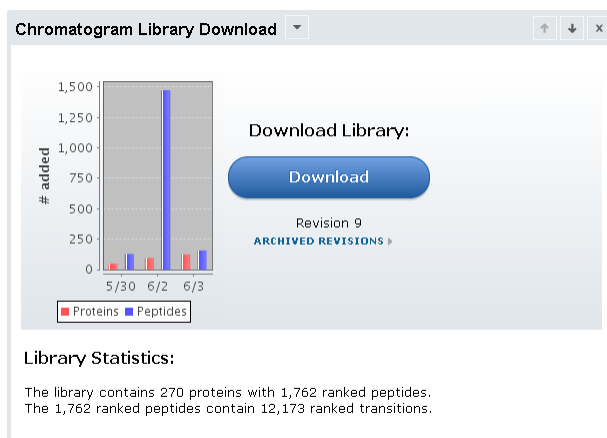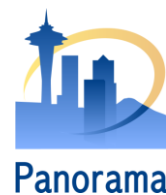

## Chromatogram Library in Skyline

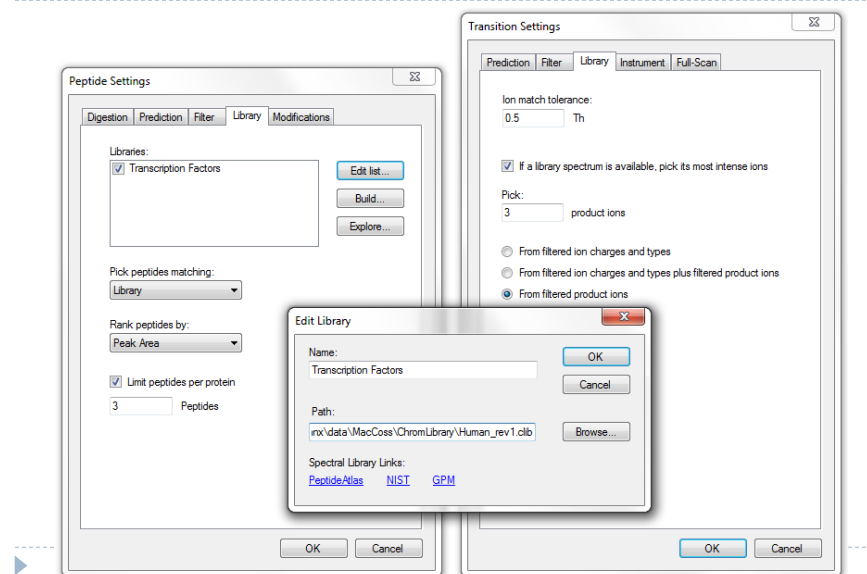

## Chromatogram Library in Skyline

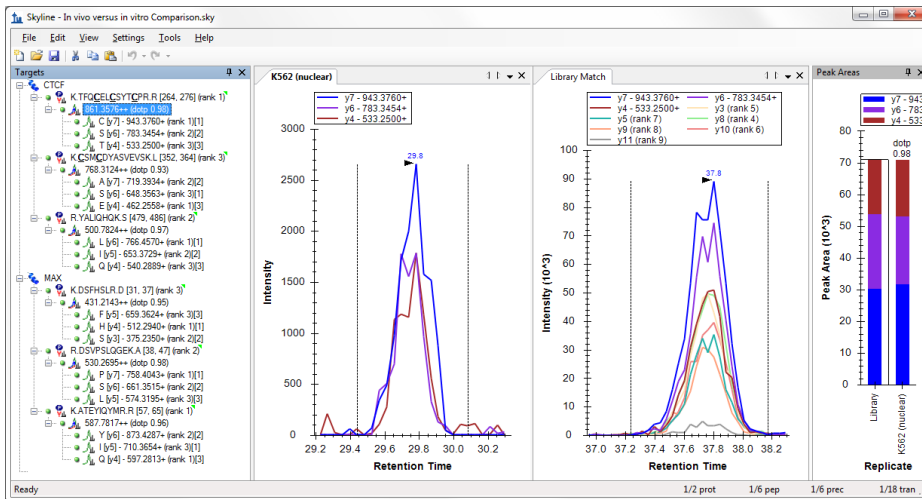

## Information Provided by Authors

- ▶ Information rich
  - ▶ Fully annotated Skyline documents
  - ▶ Custom report templates
  - ▶ Published to Panorama
- ▶ Do it yourself
  - ▶ Raw data
  - ▶ Transition lists
  - ▶ FASTA

### **III. List of discussion group leaders and participants for each Tier**

Tier I – Clinical Discussion Leaders: Andy Hoofnagle, University of Washington and Russell Grant, Laboratory Corporation of America

Participants: Leigh Anderson, Hendrik Neubert, Elizabeth Mansfield, Josip Blonder, Nadir Rifai, James Ritchie, Dan Chan, Emily Boja, Julianne Botelho, Michael Boyne, Gordon Whitely, Sang Won Lee

Tier 2: Candidate Verification Discussion Leaders: Brad Ackerman, Eli Lilly and Susan Abbatiello, Broad

Participants: Christoph Borchers, Brad Ackerman, John Koomen, Tao Liu, Mandy Paulovich, Eric Kuhn, Hasmik Keshishian, R. Reid Townsend, DR Mani, Brendan MacLean, Jennifer Van Eyk, Arun Wiita

Tier 3: Biology Focus Discussion Leaders: Bruno Domon, Luxembourg CRP-Santé and Ruth Hüttenhain, UCSF

Participants: Dan Liebler, Olga Vitek, Lukas Reiter, Robert Moritz, Eric Deutsch, Sue Weintraub, Ralph Bradshaw, Steve Carr, Juan Oses, Jerry Lee
